# Supplementary material
Source: publisher figshare collection journal article supplement (https://karger.figshare.com/ndownloader/files/7351708)
Supplement: Supplementary file 1 [file 7351708]

## Sheet: GO_miRNA_Gene
GO_Term	Gene ID	miRNA	Gene_Name	GO_Function	GO_name
GO:0003700	10320	hsa-miR-638	IKZF1	molecular_function	sequence-specific DNA binding transcription factor activity
GO:0003700	10481	hsa-miR-638	HOXB13	molecular_function	sequence-specific DNA binding transcription factor activity
GO:0003700	1316	hsa-miR-638	KLF6	molecular_function	sequence-specific DNA binding transcription factor activity
GO:0003700	1482	hsa-miR-638	NKX2-5	molecular_function	sequence-specific DNA binding transcription factor activity
GO:0003700	169841	hsa-miR-638	ZNF169	molecular_function	sequence-specific DNA binding transcription factor activity
GO:0003700	1998	hsa-miR-638	ELF2	molecular_function	sequence-specific DNA binding transcription factor activity
GO:0003700	2113	hsa-miR-638	ETS1	molecular_function	sequence-specific DNA binding transcription factor activity
GO:0003700	2306	hsa-miR-638	FOXD2	molecular_function	sequence-specific DNA binding transcription factor activity
GO:0003700	23493	hsa-miR-638	HEY2	molecular_function	sequence-specific DNA binding transcription factor activity
GO:0003700	2354	hsa-miR-638	FOSB	molecular_function	sequence-specific DNA binding transcription factor activity
GO:0003700	25833	hsa-miR-638	POU2F3	molecular_function	sequence-specific DNA binding transcription factor activity
GO:0003700	3131	hsa-miR-638	HLF	molecular_function	sequence-specific DNA binding transcription factor activity
GO:0003700	3159	hsa-miR-638	HMGA1	molecular_function	sequence-specific DNA binding transcription factor activity
GO:0003700	3174	hsa-miR-638	HNF4G	molecular_function	sequence-specific DNA binding transcription factor activity
GO:0003700	339488	hsa-miR-638	TFAP2E	molecular_function	sequence-specific DNA binding transcription factor activity
GO:0003700	4208	hsa-miR-638	MEF2C	molecular_function	sequence-specific DNA binding transcription factor activity
GO:0003700	4212	hsa-miR-638	MEIS2	molecular_function	sequence-specific DNA binding transcription factor activity
GO:0003700	4610	hsa-miR-638	MYCL1	molecular_function	sequence-specific DNA binding transcription factor activity
GO:0003700	54738	hsa-miR-638	FEV	molecular_function	sequence-specific DNA binding transcription factor activity
GO:0003700	5626	hsa-miR-638	PROP1	molecular_function	sequence-specific DNA binding transcription factor activity
GO:0003700	57616	hsa-miR-638	TSHZ3	molecular_function	sequence-specific DNA binding transcription factor activity
GO:0003700	579	hsa-miR-638	NKX3-2	molecular_function	sequence-specific DNA binding transcription factor activity
GO:0003700	5927	hsa-miR-638	KDM5A	molecular_function	sequence-specific DNA binding transcription factor activity
GO:0003700	6047	hsa-miR-638	RNF4	molecular_function	sequence-specific DNA binding transcription factor activity
GO:0003700	64344	hsa-miR-638	HIF3A	molecular_function	sequence-specific DNA binding transcription factor activity
GO:0003700	6657	hsa-miR-638	SOX2	molecular_function	sequence-specific DNA binding transcription factor activity
GO:0003700	7021	hsa-miR-638	TFAP2B	molecular_function	sequence-specific DNA binding transcription factor activity
GO:0003700	7707	hsa-miR-638	ZNF148	molecular_function	sequence-specific DNA binding transcription factor activity
GO:0003700	7710	hsa-miR-638	ZNF154	molecular_function	sequence-specific DNA binding transcription factor activity
GO:0003700	7762	hsa-miR-638	ZNF215	molecular_function	sequence-specific DNA binding transcription factor activity
GO:0003700	7775	hsa-miR-638	ZNF232	molecular_function	sequence-specific DNA binding transcription factor activity
GO:0003700	7849	hsa-miR-638	PAX8	molecular_function	sequence-specific DNA binding transcription factor activity
GO:0003700	8013	hsa-miR-638	NR4A3	molecular_function	sequence-specific DNA binding transcription factor activity
GO:0003700	81566	hsa-miR-638	CSRNP2	molecular_function	sequence-specific DNA binding transcription factor activity
GO:0003700	8543	hsa-miR-638	LMO4	molecular_function	sequence-specific DNA binding transcription factor activity
GO:0003700	8856	hsa-miR-638	NR1I2	molecular_function	sequence-specific DNA binding transcription factor activity
GO:0003700	9337	hsa-miR-638	CNOT8	molecular_function	sequence-specific DNA binding transcription factor activity
GO:0003700	9839	hsa-miR-638	ZEB2	molecular_function	sequence-specific DNA binding transcription factor activity
GO:0003700	10389	hsa-miR-1246	SCML2	molecular_function	sequence-specific DNA binding transcription factor activity
GO:0003700	10655	hsa-miR-1246	DMRT2	molecular_function	sequence-specific DNA binding transcription factor activity
GO:0003700	128553	hsa-miR-1246	TSHZ2	molecular_function	sequence-specific DNA binding transcription factor activity
GO:0003700	132625	hsa-miR-1246	ZFP42	molecular_function	sequence-specific DNA binding transcription factor activity
GO:0003700	1389	hsa-miR-1246	CREBL2	molecular_function	sequence-specific DNA binding transcription factor activity
GO:0003700	1602	hsa-miR-1246	DACH1	molecular_function	sequence-specific DNA binding transcription factor activity
GO:0003700	1748	hsa-miR-1246	DLX4	molecular_function	sequence-specific DNA binding transcription factor activity
GO:0003700	1820	hsa-miR-1246	ARID3A	molecular_function	sequence-specific DNA binding transcription factor activity
GO:0003700	2001	hsa-miR-1246	ELF5	molecular_function	sequence-specific DNA binding transcription factor activity
GO:0003700	2005	hsa-miR-1246	ELK4	molecular_function	sequence-specific DNA binding transcription factor activity
GO:0003700	203447	hsa-miR-1246	NRK	molecular_function	sequence-specific DNA binding transcription factor activity
GO:0003700	2100	hsa-miR-1246	ESR2	molecular_function	sequence-specific DNA binding transcription factor activity
GO:0003700	2104	hsa-miR-1246	ESRRG	molecular_function	sequence-specific DNA binding transcription factor activity
GO:0003700	2313	hsa-miR-1246	FLI1	molecular_function	sequence-specific DNA binding transcription factor activity
GO:0003700	23435	hsa-miR-1246	TARDBP	molecular_function	sequence-specific DNA binding transcription factor activity
GO:0003700	25833	hsa-miR-1246	POU2F3	molecular_function	sequence-specific DNA binding transcription factor activity
GO:0003700	286380	hsa-miR-1246	FOXD4L3	molecular_function	sequence-specific DNA binding transcription factor activity
GO:0003700	2969	hsa-miR-1246	GTF2I	molecular_function	sequence-specific DNA binding transcription factor activity
GO:0003700	3131	hsa-miR-1246	HLF	molecular_function	sequence-specific DNA binding transcription factor activity
GO:0003700	3239	hsa-miR-1246	HOXD13	molecular_function	sequence-specific DNA binding transcription factor activity
GO:0003700	342357	hsa-miR-1246	ZKSCAN2	molecular_function	sequence-specific DNA binding transcription factor activity
GO:0003700	4211	hsa-miR-1246	MEIS1	molecular_function	sequence-specific DNA binding transcription factor activity
GO:0003700	430	hsa-miR-1246	ASCL2	molecular_function	sequence-specific DNA binding transcription factor activity
GO:0003700	4520	hsa-miR-1246	MTF1	molecular_function	sequence-specific DNA binding transcription factor activity
GO:0003700	466	hsa-miR-1246	ATF1	molecular_function	sequence-specific DNA binding transcription factor activity
GO:0003700	4863	hsa-miR-1246	NPAT	molecular_function	sequence-specific DNA binding transcription factor activity
GO:0003700	5036	hsa-miR-1246	PA2G4	molecular_function	sequence-specific DNA binding transcription factor activity
GO:0003700	5090	hsa-miR-1246	PBX3	molecular_function	sequence-specific DNA binding transcription factor activity
GO:0003700	5178	hsa-miR-1246	PEG3	molecular_function	sequence-specific DNA binding transcription factor activity
GO:0003700	51804	hsa-miR-1246	SIX4	molecular_function	sequence-specific DNA binding transcription factor activity
GO:0003700	5241	hsa-miR-1246	PGR	molecular_function	sequence-specific DNA binding transcription factor activity
GO:0003700	5463	hsa-miR-1246	POU6F1	molecular_function	sequence-specific DNA binding transcription factor activity
GO:0003700	5465	hsa-miR-1246	PPARA	molecular_function	sequence-specific DNA binding transcription factor activity
GO:0003700	55769	hsa-miR-1246	ZNF83	molecular_function	sequence-specific DNA binding transcription factor activity
GO:0003700	55888	hsa-miR-1246	ZNF167	molecular_function	sequence-specific DNA binding transcription factor activity
GO:0003700	571	hsa-miR-1246	BACH1	molecular_function	sequence-specific DNA binding transcription factor activity
GO:0003700	57594	hsa-miR-1246	HOMEZ	molecular_function	sequence-specific DNA binding transcription factor activity
GO:0003700	58487	hsa-miR-1246	CREBZF	molecular_function	sequence-specific DNA binding transcription factor activity
GO:0003700	5927	hsa-miR-1246	KDM5A	molecular_function	sequence-specific DNA binding transcription factor activity
GO:0003700	6095	hsa-miR-1246	RORA	molecular_function	sequence-specific DNA binding transcription factor activity
GO:0003700	64288	hsa-miR-1246	ZNF323	molecular_function	sequence-specific DNA binding transcription factor activity
GO:0003700	6474	hsa-miR-1246	SHOX2	molecular_function	sequence-specific DNA binding transcription factor activity
GO:0003700	653404	hsa-miR-1246	FOXD4L6	molecular_function	sequence-specific DNA binding transcription factor activity
GO:0003700	6657	hsa-miR-1246	SOX2	molecular_function	sequence-specific DNA binding transcription factor activity
GO:0003700	6688	hsa-miR-1246	SPI1	molecular_function	sequence-specific DNA binding transcription factor activity
GO:0003700	677	hsa-miR-1246	ZFP36L1	molecular_function	sequence-specific DNA binding transcription factor activity
GO:0003700	7003	hsa-miR-1246	TEAD1	molecular_function	sequence-specific DNA binding transcription factor activity
GO:0003700	7068	hsa-miR-1246	THRB	molecular_function	sequence-specific DNA binding transcription factor activity
GO:0003700	7227	hsa-miR-1246	TRPS1	molecular_function	sequence-specific DNA binding transcription factor activity
GO:0003700	7490	hsa-miR-1246	WT1	molecular_function	sequence-specific DNA binding transcription factor activity
GO:0003700	7547	hsa-miR-1246	ZIC3	molecular_function	sequence-specific DNA binding transcription factor activity
GO:0003700	7567	hsa-miR-1246	ZNF19	molecular_function	sequence-specific DNA binding transcription factor activity
GO:0003700	7644	hsa-miR-1246	ZNF91	molecular_function	sequence-specific DNA binding transcription factor activity
GO:0003700	7694	hsa-miR-1246	ZNF135	molecular_function	sequence-specific DNA binding transcription factor activity
GO:0003700	7706	hsa-miR-1246	TRIM25	molecular_function	sequence-specific DNA binding transcription factor activity
GO:0003700	7711	hsa-miR-1246	ZNF155	molecular_function	sequence-specific DNA binding transcription factor activity
GO:0003700	7741	hsa-miR-1246	ZNF187	molecular_function	sequence-specific DNA binding transcription factor activity
GO:0003700	7745	hsa-miR-1246	ZNF192	molecular_function	sequence-specific DNA binding transcription factor activity
GO:0003700	7849	hsa-miR-1246	PAX8	molecular_function	sequence-specific DNA binding transcription factor activity
GO:0003700	79365	hsa-miR-1246	BHLHE41	molecular_function	sequence-specific DNA binding transcription factor activity
GO:0003700	79733	hsa-miR-1246	E2F8	molecular_function	sequence-specific DNA binding transcription factor activity
GO:0003700	7975	hsa-miR-1246	MAFK	molecular_function	sequence-specific DNA binding transcription factor activity
GO:0003700	80317	hsa-miR-1246	ZKSCAN3	molecular_function	sequence-specific DNA binding transcription factor activity
GO:0003700	84458	hsa-miR-1246	LCOR	molecular_function	sequence-specific DNA binding transcription factor activity
GO:0003700	84525	hsa-miR-1246	HOPX	molecular_function	sequence-specific DNA binding transcription factor activity
GO:0003700	90655	hsa-miR-1246	TGIF2LY	molecular_function	sequence-specific DNA binding transcription factor activity
GO:0003700	9603	hsa-miR-1246	NFE2L3	molecular_function	sequence-specific DNA binding transcription factor activity
GO:0003700	10481	hsa-miR-4734	HOXB13	molecular_function	sequence-specific DNA binding transcription factor activity
GO:0003700	10538	hsa-miR-4734	BATF	molecular_function	sequence-specific DNA binding transcription factor activity
GO:0003700	10736	hsa-miR-4734	SIX2	molecular_function	sequence-specific DNA binding transcription factor activity
GO:0003700	121643	hsa-miR-4734	FOXN4	molecular_function	sequence-specific DNA binding transcription factor activity
GO:0003700	1523	hsa-miR-4734	CUX1	molecular_function	sequence-specific DNA binding transcription factor activity
GO:0003700	1871	hsa-miR-4734	E2F3	molecular_function	sequence-specific DNA binding transcription factor activity
GO:0003700	2298	hsa-miR-4734	FOXD4	molecular_function	sequence-specific DNA binding transcription factor activity
GO:0003700	2300	hsa-miR-4734	FOXL1	molecular_function	sequence-specific DNA binding transcription factor activity
GO:0003700	23090	hsa-miR-4734	ZNF423	molecular_function	sequence-specific DNA binding transcription factor activity
GO:0003700	25806	hsa-miR-4734	VAX2	molecular_function	sequence-specific DNA binding transcription factor activity
GO:0003700	27287	hsa-miR-4734	VENTX	molecular_function	sequence-specific DNA binding transcription factor activity
GO:0003700	286380	hsa-miR-4734	FOXD4L3	molecular_function	sequence-specific DNA binding transcription factor activity
GO:0003700	3167	hsa-miR-4734	HMX2	molecular_function	sequence-specific DNA binding transcription factor activity
GO:0003700	3198	hsa-miR-4734	HOXA1	molecular_function	sequence-specific DNA binding transcription factor activity
GO:0003700	3204	hsa-miR-4734	HOXA7	molecular_function	sequence-specific DNA binding transcription factor activity
GO:0003700	3222	hsa-miR-4734	HOXC5	molecular_function	sequence-specific DNA binding transcription factor activity
GO:0003700	349334	hsa-miR-4734	FOXD4L4	molecular_function	sequence-specific DNA binding transcription factor activity
GO:0003700	4772	hsa-miR-4734	NFATC1	molecular_function	sequence-specific DNA binding transcription factor activity
GO:0003700	5087	hsa-miR-4734	PBX1	molecular_function	sequence-specific DNA binding transcription factor activity
GO:0003700	54738	hsa-miR-4734	FEV	molecular_function	sequence-specific DNA binding transcription factor activity
GO:0003700	56033	hsa-miR-4734	BARX1	molecular_function	sequence-specific DNA binding transcription factor activity
GO:0003700	5994	hsa-miR-4734	RFXAP	molecular_function	sequence-specific DNA binding transcription factor activity
GO:0003700	6257	hsa-miR-4734	RXRB	molecular_function	sequence-specific DNA binding transcription factor activity
GO:0003700	63950	hsa-miR-4734	DMRTA2	molecular_function	sequence-specific DNA binding transcription factor activity
GO:0003700	653404	hsa-miR-4734	FOXD4L6	molecular_function	sequence-specific DNA binding transcription factor activity
GO:0003700	653427	hsa-miR-4734	FOXD4L5	molecular_function	sequence-specific DNA binding transcription factor activity
GO:0003700	7161	hsa-miR-4734	TP73	molecular_function	sequence-specific DNA binding transcription factor activity
GO:0003700	7711	hsa-miR-4734	ZNF155	molecular_function	sequence-specific DNA binding transcription factor activity
GO:0003700	7975	hsa-miR-4734	MAFK	molecular_function	sequence-specific DNA binding transcription factor activity
GO:0003700	79776	hsa-miR-4734	ZFHX4	molecular_function	sequence-specific DNA binding transcription factor activity
GO:0003700	8022	hsa-miR-4734	LHX3	molecular_function	sequence-specific DNA binding transcription factor activity
GO:0003700	8028	hsa-miR-4734	MLLT10	molecular_function	sequence-specific DNA binding transcription factor activity
GO:0003700	1029	hsa-miR-663	CDKN2A	molecular_function	sequence-specific DNA binding transcription factor activity
GO:0003700	1044	hsa-miR-663	CDX1	molecular_function	sequence-specific DNA binding transcription factor activity
GO:0003700	10716	hsa-miR-663	TBR1	molecular_function	sequence-specific DNA binding transcription factor activity
GO:0003700	10736	hsa-miR-663	SIX2	molecular_function	sequence-specific DNA binding transcription factor activity
GO:0003700	11016	hsa-miR-663	ATF7	molecular_function	sequence-specific DNA binding transcription factor activity
GO:0003700	121643	hsa-miR-663	FOXN4	molecular_function	sequence-specific DNA binding transcription factor activity
GO:0003700	122953	hsa-miR-663	JDP2	molecular_function	sequence-specific DNA binding transcription factor activity
GO:0003700	1482	hsa-miR-663	NKX2-5	molecular_function	sequence-specific DNA binding transcription factor activity
GO:0003700	1487	hsa-miR-663	CTBP1	molecular_function	sequence-specific DNA binding transcription factor activity
GO:0003700	1820	hsa-miR-663	ARID3A	molecular_function	sequence-specific DNA binding transcription factor activity
GO:0003700	2000	hsa-miR-663	ELF4	molecular_function	sequence-specific DNA binding transcription factor activity
GO:0003700	2019	hsa-miR-663	EN1	molecular_function	sequence-specific DNA binding transcription factor activity
GO:0003700	2120	hsa-miR-663	ETV6	molecular_function	sequence-specific DNA binding transcription factor activity
GO:0003700	23440	hsa-miR-663	OTP	molecular_function	sequence-specific DNA binding transcription factor activity
GO:0003700	2354	hsa-miR-663	FOSB	molecular_function	sequence-specific DNA binding transcription factor activity
GO:0003700	2516	hsa-miR-663	NR5A1	molecular_function	sequence-specific DNA binding transcription factor activity
GO:0003700	26508	hsa-miR-663	HEYL	molecular_function	sequence-specific DNA binding transcription factor activity
GO:0003700	26574	hsa-miR-663	AATF	molecular_function	sequence-specific DNA binding transcription factor activity
GO:0003700	2737	hsa-miR-663	GLI3	molecular_function	sequence-specific DNA binding transcription factor activity
GO:0003700	283248	hsa-miR-663	RCOR2	molecular_function	sequence-specific DNA binding transcription factor activity
GO:0003700	2972	hsa-miR-663	BRF1	molecular_function	sequence-specific DNA binding transcription factor activity
GO:0003700	29956	hsa-miR-663	LASS2	molecular_function	sequence-specific DNA binding transcription factor activity
GO:0003700	30009	hsa-miR-663	TBX21	molecular_function	sequence-specific DNA binding transcription factor activity
GO:0003700	3159	hsa-miR-663	HMGA1	molecular_function	sequence-specific DNA binding transcription factor activity
GO:0003700	3172	hsa-miR-663	HNF4A	molecular_function	sequence-specific DNA binding transcription factor activity
GO:0003700	3196	hsa-miR-663	TLX2	molecular_function	sequence-specific DNA binding transcription factor activity
GO:0003700	3198	hsa-miR-663	HOXA1	molecular_function	sequence-specific DNA binding transcription factor activity
GO:0003700	3218	hsa-miR-663	HOXB8	molecular_function	sequence-specific DNA binding transcription factor activity
GO:0003700	3226	hsa-miR-663	HOXC10	molecular_function	sequence-specific DNA binding transcription factor activity
GO:0003700	3227	hsa-miR-663	HOXC11	molecular_function	sequence-specific DNA binding transcription factor activity
GO:0003700	333929	hsa-miR-663	SNAI3	molecular_function	sequence-specific DNA binding transcription factor activity
GO:0003700	338917	hsa-miR-663	VSX2	molecular_function	sequence-specific DNA binding transcription factor activity
GO:0003700	347853	hsa-miR-663	TBX10	molecular_function	sequence-specific DNA binding transcription factor activity
GO:0003700	3607	hsa-miR-663	FOXK2	molecular_function	sequence-specific DNA binding transcription factor activity
GO:0003700	3662	hsa-miR-663	IRF4	molecular_function	sequence-specific DNA binding transcription factor activity
GO:0003700	399823	hsa-miR-663	FOXI2	molecular_function	sequence-specific DNA binding transcription factor activity
GO:0003700	4010	hsa-miR-663	LMX1B	molecular_function	sequence-specific DNA binding transcription factor activity
GO:0003700	4088	hsa-miR-663	SMAD3	molecular_function	sequence-specific DNA binding transcription factor activity
GO:0003700	4335	hsa-miR-663	MNT	molecular_function	sequence-specific DNA binding transcription factor activity
GO:0003700	4774	hsa-miR-663	NFIA	molecular_function	sequence-specific DNA binding transcription factor activity
GO:0003700	4782	hsa-miR-663	NFIC	molecular_function	sequence-specific DNA binding transcription factor activity
GO:0003700	5087	hsa-miR-663	PBX1	molecular_function	sequence-specific DNA binding transcription factor activity
GO:0003700	51043	hsa-miR-663	ZBTB7B	molecular_function	sequence-specific DNA binding transcription factor activity
GO:0003700	51222	hsa-miR-663	ZNF219	molecular_function	sequence-specific DNA binding transcription factor activity
GO:0003700	5307	hsa-miR-663	PITX1	molecular_function	sequence-specific DNA binding transcription factor activity
GO:0003700	5452	hsa-miR-663	POU2F2	molecular_function	sequence-specific DNA binding transcription factor activity
GO:0003700	5453	hsa-miR-663	POU3F1	molecular_function	sequence-specific DNA binding transcription factor activity
GO:0003700	55806	hsa-miR-663	HR	molecular_function	sequence-specific DNA binding transcription factor activity
GO:0003700	5626	hsa-miR-663	PROP1	molecular_function	sequence-specific DNA binding transcription factor activity
GO:0003700	56731	hsa-miR-663	SLC2A4RG	molecular_function	sequence-specific DNA binding transcription factor activity
GO:0003700	56751	hsa-miR-663	BARHL1	molecular_function	sequence-specific DNA binding transcription factor activity
GO:0003700	579	hsa-miR-663	NKX3-2	molecular_function	sequence-specific DNA binding transcription factor activity
GO:0003700	5814	hsa-miR-663	PURB	molecular_function	sequence-specific DNA binding transcription factor activity
GO:0003700	6299	hsa-miR-663	SALL1	molecular_function	sequence-specific DNA binding transcription factor activity
GO:0003700	6473	hsa-miR-663	SHOX	molecular_function	sequence-specific DNA binding transcription factor activity
GO:0003700	64843	hsa-miR-663	ISL2	molecular_function	sequence-specific DNA binding transcription factor activity
GO:0003700	6493	hsa-miR-663	SIM2	molecular_function	sequence-specific DNA binding transcription factor activity
GO:0003700	6650	hsa-miR-663	SOLH	molecular_function	sequence-specific DNA binding transcription factor activity
GO:0003700	6656	hsa-miR-663	SOX1	molecular_function	sequence-specific DNA binding transcription factor activity
GO:0003700	668	hsa-miR-663	FOXL2	molecular_function	sequence-specific DNA binding transcription factor activity
GO:0003700	6688	hsa-miR-663	SPI1	molecular_function	sequence-specific DNA binding transcription factor activity
GO:0003700	6899	hsa-miR-663	TBX1	molecular_function	sequence-specific DNA binding transcription factor activity
GO:0003700	6913	hsa-miR-663	TBX15	molecular_function	sequence-specific DNA binding transcription factor activity
GO:0003700	6926	hsa-miR-663	TBX3	molecular_function	sequence-specific DNA binding transcription factor activity
GO:0003700	7021	hsa-miR-663	TFAP2B	molecular_function	sequence-specific DNA binding transcription factor activity
GO:0003700	7030	hsa-miR-663	TFE3	molecular_function	sequence-specific DNA binding transcription factor activity
GO:0003700	7071	hsa-miR-663	KLF10	molecular_function	sequence-specific DNA binding transcription factor activity
GO:0003700	7157	hsa-miR-663	TP53	molecular_function	sequence-specific DNA binding transcription factor activity
GO:0003700	7621	hsa-miR-663	ZNF70	molecular_function	sequence-specific DNA binding transcription factor activity
GO:0003700	79603	hsa-miR-663	LASS4	molecular_function	sequence-specific DNA binding transcription factor activity
GO:0003700	83482	hsa-miR-663	SCRT1	molecular_function	sequence-specific DNA binding transcription factor activity
GO:0003700	83855	hsa-miR-663	KLF16	molecular_function	sequence-specific DNA binding transcription factor activity
GO:0003700	84699	hsa-miR-663	CREB3L3	molecular_function	sequence-specific DNA binding transcription factor activity
GO:0003700	84839	hsa-miR-663	RAX2	molecular_function	sequence-specific DNA binding transcription factor activity
GO:0003700	85446	hsa-miR-663	ZFHX2	molecular_function	sequence-specific DNA binding transcription factor activity
GO:0003700	863	hsa-miR-663	CBFA2T3	molecular_function	sequence-specific DNA binding transcription factor activity
GO:0003700	89887	hsa-miR-663	ZNF628	molecular_function	sequence-specific DNA binding transcription factor activity
GO:0003700	9112	hsa-miR-663	MTA1	molecular_function	sequence-specific DNA binding transcription factor activity
GO:0003700	9464	hsa-miR-663	HAND2	molecular_function	sequence-specific DNA binding transcription factor activity
GO:0003700	9935	hsa-miR-663	MAFB	molecular_function	sequence-specific DNA binding transcription factor activity
GO:0003700	1052	hsa-miR-3178	CEBPD	molecular_function	sequence-specific DNA binding transcription factor activity
GO:0003700	1390	hsa-miR-3178	CREM	molecular_function	sequence-specific DNA binding transcription factor activity
GO:0003700	1406	hsa-miR-3178	CRX	molecular_function	sequence-specific DNA binding transcription factor activity
GO:0003700	170302	hsa-miR-3178	ARX	molecular_function	sequence-specific DNA binding transcription factor activity
GO:0003700	2019	hsa-miR-3178	EN1	molecular_function	sequence-specific DNA binding transcription factor activity
GO:0003700	2297	hsa-miR-3178	FOXD1	molecular_function	sequence-specific DNA binding transcription factor activity
GO:0003700	23440	hsa-miR-3178	OTP	molecular_function	sequence-specific DNA binding transcription factor activity
GO:0003700	25833	hsa-miR-3178	POU2F3	molecular_function	sequence-specific DNA binding transcription factor activity
GO:0003700	26257	hsa-miR-3178	NKX2-8	molecular_function	sequence-specific DNA binding transcription factor activity
GO:0003700	27022	hsa-miR-3178	FOXD3	molecular_function	sequence-specific DNA binding transcription factor activity
GO:0003700	3195	hsa-miR-3178	TLX1	molecular_function	sequence-specific DNA binding transcription factor activity
GO:0003700	3198	hsa-miR-3178	HOXA1	molecular_function	sequence-specific DNA binding transcription factor activity
GO:0003700	3216	hsa-miR-3178	HOXB6	molecular_function	sequence-specific DNA binding transcription factor activity
GO:0003700	3222	hsa-miR-3178	HOXC5	molecular_function	sequence-specific DNA binding transcription factor activity
GO:0003700	3232	hsa-miR-3178	HOXD3	molecular_function	sequence-specific DNA binding transcription factor activity
GO:0003700	342357	hsa-miR-3178	ZKSCAN2	molecular_function	sequence-specific DNA binding transcription factor activity
GO:0003700	3725	hsa-miR-3178	JUN	molecular_function	sequence-specific DNA binding transcription factor activity
GO:0003700	4087	hsa-miR-3178	SMAD2	molecular_function	sequence-specific DNA binding transcription factor activity
GO:0003700	4782	hsa-miR-3178	NFIC	molecular_function	sequence-specific DNA binding transcription factor activity
GO:0003700	4851	hsa-miR-3178	NOTCH1	molecular_function	sequence-specific DNA binding transcription factor activity
GO:0003700	5307	hsa-miR-3178	PITX1	molecular_function	sequence-specific DNA binding transcription factor activity
GO:0003700	5309	hsa-miR-3178	PITX3	molecular_function	sequence-specific DNA binding transcription factor activity
GO:0003700	5453	hsa-miR-3178	POU3F1	molecular_function	sequence-specific DNA binding transcription factor activity
GO:0003700	6473	hsa-miR-3178	SHOX	molecular_function	sequence-specific DNA binding transcription factor activity
GO:0003700	6474	hsa-miR-3178	SHOX2	molecular_function	sequence-specific DNA binding transcription factor activity
GO:0003700	6656	hsa-miR-3178	SOX1	molecular_function	sequence-specific DNA binding transcription factor activity
GO:0003700	7020	hsa-miR-3178	TFAP2A	molecular_function	sequence-specific DNA binding transcription factor activity
GO:0003700	7161	hsa-miR-3178	TP73	molecular_function	sequence-specific DNA binding transcription factor activity
GO:0003700	7555	hsa-miR-3178	CNBP	molecular_function	sequence-specific DNA binding transcription factor activity
GO:0003700	79364	hsa-miR-3178	ZXDC	molecular_function	sequence-specific DNA binding transcription factor activity
GO:0003700	79923	hsa-miR-3178	NANOG	molecular_function	sequence-specific DNA binding transcription factor activity
GO:0003700	83595	hsa-miR-3178	SOX7	molecular_function	sequence-specific DNA binding transcription factor activity
GO:0003700	84891	hsa-miR-3178	ZSCAN10	molecular_function	sequence-specific DNA binding transcription factor activity
GO:0003700	863	hsa-miR-3178	CBFA2T3	molecular_function	sequence-specific DNA binding transcription factor activity
GO:0003700	9242	hsa-miR-3178	MSC	molecular_function	sequence-specific DNA binding transcription factor activity
GO:0003700	9705	hsa-miR-3178	ST18	molecular_function	sequence-specific DNA binding transcription factor activity
GO:0003700	9935	hsa-miR-3178	MAFB	molecular_function	sequence-specific DNA binding transcription factor activity
GO:0003700	10389	hsa-miR-21	SCML2	molecular_function	sequence-specific DNA binding transcription factor activity
GO:0003700	10520	hsa-miR-21	ZNF211	molecular_function	sequence-specific DNA binding transcription factor activity
GO:0003700	10765	hsa-miR-21	KDM5B	molecular_function	sequence-specific DNA binding transcription factor activity
GO:0003700	10943	hsa-miR-21	MSL3	molecular_function	sequence-specific DNA binding transcription factor activity
GO:0003700	11016	hsa-miR-21	ATF7	molecular_function	sequence-specific DNA binding transcription factor activity
GO:0003700	11278	hsa-miR-21	KLF12	molecular_function	sequence-specific DNA binding transcription factor activity
GO:0003700	1316	hsa-miR-21	KLF6	molecular_function	sequence-specific DNA binding transcription factor activity
GO:0003700	153222	hsa-miR-21	C5orf41	molecular_function	sequence-specific DNA binding transcription factor activity
GO:0003700	158399	hsa-miR-21	ZNF483	molecular_function	sequence-specific DNA binding transcription factor activity
GO:0003700	1746	hsa-miR-21	DLX2	molecular_function	sequence-specific DNA binding transcription factor activity
GO:0003700	195828	hsa-miR-21	ZNF367	molecular_function	sequence-specific DNA binding transcription factor activity
GO:0003700	1960	hsa-miR-21	EGR3	molecular_function	sequence-specific DNA binding transcription factor activity
GO:0003700	1998	hsa-miR-21	ELF2	molecular_function	sequence-specific DNA binding transcription factor activity
GO:0003700	203523	hsa-miR-21	ZNF449	molecular_function	sequence-specific DNA binding transcription factor activity
GO:0003700	2115	hsa-miR-21	ETV1	molecular_function	sequence-specific DNA binding transcription factor activity
GO:0003700	2308	hsa-miR-21	FOXO1	molecular_function	sequence-specific DNA binding transcription factor activity
GO:0003700	2309	hsa-miR-21	FOXO3	molecular_function	sequence-specific DNA binding transcription factor activity
GO:0003700	23394	hsa-miR-21	ADNP	molecular_function	sequence-specific DNA binding transcription factor activity
GO:0003700	253461	hsa-miR-21	ZBTB38	molecular_function	sequence-specific DNA binding transcription factor activity
GO:0003700	26298	hsa-miR-21	EHF	molecular_function	sequence-specific DNA binding transcription factor activity
GO:0003700	2908	hsa-miR-21	NR3C1	molecular_function	sequence-specific DNA binding transcription factor activity
GO:0003700	3344	hsa-miR-21	FOXN2	molecular_function	sequence-specific DNA binding transcription factor activity
GO:0003700	3516	hsa-miR-21	RBPJ	molecular_function	sequence-specific DNA binding transcription factor activity
GO:0003700	353274	hsa-miR-21	ZNF445	molecular_function	sequence-specific DNA binding transcription factor activity
GO:0003700	4092	hsa-miR-21	SMAD7	molecular_function	sequence-specific DNA binding transcription factor activity
GO:0003700	4208	hsa-miR-21	MEF2C	molecular_function	sequence-specific DNA binding transcription factor activity
GO:0003700	4211	hsa-miR-21	MEIS1	molecular_function	sequence-specific DNA binding transcription factor activity
GO:0003700	4487	hsa-miR-21	MSX1	molecular_function	sequence-specific DNA binding transcription factor activity
GO:0003700	4610	hsa-miR-21	MYCL1	molecular_function	sequence-specific DNA binding transcription factor activity
GO:0003700	4774	hsa-miR-21	NFIA	molecular_function	sequence-specific DNA binding transcription factor activity
GO:0003700	4781	hsa-miR-21	NFIB	molecular_function	sequence-specific DNA binding transcription factor activity
GO:0003700	4901	hsa-miR-21	NRL	molecular_function	sequence-specific DNA binding transcription factor activity
GO:0003700	51270	hsa-miR-21	TFDP3	molecular_function	sequence-specific DNA binding transcription factor activity
GO:0003700	51274	hsa-miR-21	KLF3	molecular_function	sequence-specific DNA binding transcription factor activity
GO:0003700	5308	hsa-miR-21	PITX2	molecular_function	sequence-specific DNA binding transcription factor activity
GO:0003700	5324	hsa-miR-21	PLAG1	molecular_function	sequence-specific DNA binding transcription factor activity
GO:0003700	5396	hsa-miR-21	PRRX1	molecular_function	sequence-specific DNA binding transcription factor activity
GO:0003700	5457	hsa-miR-21	POU4F1	molecular_function	sequence-specific DNA binding transcription factor activity
GO:0003700	5465	hsa-miR-21	PPARA	molecular_function	sequence-specific DNA binding transcription factor activity
GO:0003700	55553	hsa-miR-21	SOX6	molecular_function	sequence-specific DNA binding transcription factor activity
GO:0003700	55809	hsa-miR-21	TRERF1	molecular_function	sequence-specific DNA binding transcription factor activity
GO:0003700	56731	hsa-miR-21	SLC2A4RG	molecular_function	sequence-specific DNA binding transcription factor activity
GO:0003700	57459	hsa-miR-21	GATAD2B	molecular_function	sequence-specific DNA binding transcription factor activity
GO:0003700	5926	hsa-miR-21	ARID4A	molecular_function	sequence-specific DNA binding transcription factor activity
GO:0003700	60529	hsa-miR-21	ALX4	molecular_function	sequence-specific DNA binding transcription factor activity
GO:0003700	6304	hsa-miR-21	SATB1	molecular_function	sequence-specific DNA binding transcription factor activity
GO:0003700	646	hsa-miR-21	BNC1	molecular_function	sequence-specific DNA binding transcription factor activity
GO:0003700	6657	hsa-miR-21	SOX2	molecular_function	sequence-specific DNA binding transcription factor activity
GO:0003700	6660	hsa-miR-21	SOX5	molecular_function	sequence-specific DNA binding transcription factor activity
GO:0003700	6774	hsa-miR-21	STAT3	molecular_function	sequence-specific DNA binding transcription factor activity
GO:0003700	678	hsa-miR-21	ZFP36L2	molecular_function	sequence-specific DNA binding transcription factor activity
GO:0003700	6877	hsa-miR-21	TAF5	molecular_function	sequence-specific DNA binding transcription factor activity
GO:0003700	688	hsa-miR-21	KLF5	molecular_function	sequence-specific DNA binding transcription factor activity
GO:0003700	6909	hsa-miR-21	TBX2	molecular_function	sequence-specific DNA binding transcription factor activity
GO:0003700	7068	hsa-miR-21	THRB	molecular_function	sequence-specific DNA binding transcription factor activity
GO:0003700	7181	hsa-miR-21	NR2C1	molecular_function	sequence-specific DNA binding transcription factor activity
GO:0003700	7555	hsa-miR-21	CNBP	molecular_function	sequence-specific DNA binding transcription factor activity
GO:0003700	7584	hsa-miR-21	ZNF35	molecular_function	sequence-specific DNA binding transcription factor activity
GO:0003700	7743	hsa-miR-21	ZNF189	molecular_function	sequence-specific DNA binding transcription factor activity
GO:0003700	7764	hsa-miR-21	ZNF217	molecular_function	sequence-specific DNA binding transcription factor activity
GO:0003700	7789	hsa-miR-21	ZXDA	molecular_function	sequence-specific DNA binding transcription factor activity
GO:0003700	80034	hsa-miR-21	CSRNP3	molecular_function	sequence-specific DNA binding transcription factor activity
GO:0003700	8092	hsa-miR-21	ALX1	molecular_function	sequence-specific DNA binding transcription factor activity
GO:0003700	83595	hsa-miR-21	SOX7	molecular_function	sequence-specific DNA binding transcription factor activity
GO:0003700	84458	hsa-miR-21	LCOR	molecular_function	sequence-specific DNA binding transcription factor activity
GO:0003700	8538	hsa-miR-21	BARX2	molecular_function	sequence-specific DNA binding transcription factor activity
GO:0003700	8880	hsa-miR-21	FUBP1	molecular_function	sequence-specific DNA binding transcription factor activity
GO:0003700	9337	hsa-miR-21	CNOT8	molecular_function	sequence-specific DNA binding transcription factor activity
GO:0003700	9541	hsa-miR-21	CIR1	molecular_function	sequence-specific DNA binding transcription factor activity
GO:0003700	9586	hsa-miR-21	CREB5	molecular_function	sequence-specific DNA binding transcription factor activity
GO:0003700	10002	hsa-miR-4492	NR2E3	molecular_function	sequence-specific DNA binding transcription factor activity
GO:0003700	100125288	hsa-miR-4492	ZGLP1	molecular_function	sequence-specific DNA binding transcription factor activity
GO:0003700	100271849	hsa-miR-4492	MEF2B	molecular_function	sequence-specific DNA binding transcription factor activity
GO:0003700	10155	hsa-miR-4492	TRIM28	molecular_function	sequence-specific DNA binding transcription factor activity
GO:0003700	10362	hsa-miR-4492	HMG20B	molecular_function	sequence-specific DNA binding transcription factor activity
GO:0003700	10573	hsa-miR-4492	MRPL28	molecular_function	sequence-specific DNA binding transcription factor activity
GO:0003700	10655	hsa-miR-4492	DMRT2	molecular_function	sequence-specific DNA binding transcription factor activity
GO:0003700	10664	hsa-miR-4492	CTCF	molecular_function	sequence-specific DNA binding transcription factor activity
GO:0003700	11016	hsa-miR-4492	ATF7	molecular_function	sequence-specific DNA binding transcription factor activity
GO:0003700	11023	hsa-miR-4492	VAX1	molecular_function	sequence-specific DNA binding transcription factor activity
GO:0003700	1112	hsa-miR-4492	FOXN3	molecular_function	sequence-specific DNA binding transcription factor activity
GO:0003700	11143	hsa-miR-4492	MYST2	molecular_function	sequence-specific DNA binding transcription factor activity
GO:0003700	11178	hsa-miR-4492	LZTS1	molecular_function	sequence-specific DNA binding transcription factor activity
GO:0003700	116113	hsa-miR-4492	FOXP4	molecular_function	sequence-specific DNA binding transcription factor activity
GO:0003700	122953	hsa-miR-4492	JDP2	molecular_function	sequence-specific DNA binding transcription factor activity
GO:0003700	128209	hsa-miR-4492	KLF17	molecular_function	sequence-specific DNA binding transcription factor activity
GO:0003700	1387	hsa-miR-4492	CREBBP	molecular_function	sequence-specific DNA binding transcription factor activity
GO:0003700	139324	hsa-miR-4492	HDX	molecular_function	sequence-specific DNA binding transcription factor activity
GO:0003700	140628	hsa-miR-4492	GATA5	molecular_function	sequence-specific DNA binding transcription factor activity
GO:0003700	147912	hsa-miR-4492	SIX5	molecular_function	sequence-specific DNA binding transcription factor activity
GO:0003700	1523	hsa-miR-4492	CUX1	molecular_function	sequence-specific DNA binding transcription factor activity
GO:0003700	153222	hsa-miR-4492	C5orf41	molecular_function	sequence-specific DNA binding transcription factor activity
GO:0003700	153572	hsa-miR-4492	IRX2	molecular_function	sequence-specific DNA binding transcription factor activity
GO:0003700	165	hsa-miR-4492	AEBP1	molecular_function	sequence-specific DNA binding transcription factor activity
GO:0003700	169792	hsa-miR-4492	GLIS3	molecular_function	sequence-specific DNA binding transcription factor activity
GO:0003700	1869	hsa-miR-4492	E2F1	molecular_function	sequence-specific DNA binding transcription factor activity
GO:0003700	1870	hsa-miR-4492	E2F2	molecular_function	sequence-specific DNA binding transcription factor activity
GO:0003700	1874	hsa-miR-4492	E2F4	molecular_function	sequence-specific DNA binding transcription factor activity
GO:0003700	1876	hsa-miR-4492	E2F6	molecular_function	sequence-specific DNA binding transcription factor activity
GO:0003700	2001	hsa-miR-4492	ELF5	molecular_function	sequence-specific DNA binding transcription factor activity
GO:0003700	2002	hsa-miR-4492	ELK1	molecular_function	sequence-specific DNA binding transcription factor activity
GO:0003700	2016	hsa-miR-4492	EMX1	molecular_function	sequence-specific DNA binding transcription factor activity
GO:0003700	2078	hsa-miR-4492	ERG	molecular_function	sequence-specific DNA binding transcription factor activity
GO:0003700	2101	hsa-miR-4492	ESRRA	molecular_function	sequence-specific DNA binding transcription factor activity
GO:0003700	2104	hsa-miR-4492	ESRRG	molecular_function	sequence-specific DNA binding transcription factor activity
GO:0003700	2117	hsa-miR-4492	ETV3	molecular_function	sequence-specific DNA binding transcription factor activity
GO:0003700	221785	hsa-miR-4492	ZNF498	molecular_function	sequence-specific DNA binding transcription factor activity
GO:0003700	221937	hsa-miR-4492	FOXK1	molecular_function	sequence-specific DNA binding transcription factor activity
GO:0003700	22887	hsa-miR-4492	FOXJ3	molecular_function	sequence-specific DNA binding transcription factor activity
GO:0003700	2299	hsa-miR-4492	FOXI1	molecular_function	sequence-specific DNA binding transcription factor activity
GO:0003700	2302	hsa-miR-4492	FOXJ1	molecular_function	sequence-specific DNA binding transcription factor activity
GO:0003700	2307	hsa-miR-4492	FOXS1	molecular_function	sequence-specific DNA binding transcription factor activity
GO:0003700	2308	hsa-miR-4492	FOXO1	molecular_function	sequence-specific DNA binding transcription factor activity
GO:0003700	23316	hsa-miR-4492	CUX2	molecular_function	sequence-specific DNA binding transcription factor activity
GO:0003700	23462	hsa-miR-4492	HEY1	molecular_function	sequence-specific DNA binding transcription factor activity
GO:0003700	2516	hsa-miR-4492	NR5A1	molecular_function	sequence-specific DNA binding transcription factor activity
GO:0003700	253461	hsa-miR-4492	ZBTB38	molecular_function	sequence-specific DNA binding transcription factor activity
GO:0003700	257	hsa-miR-4492	ALX3	molecular_function	sequence-specific DNA binding transcription factor activity
GO:0003700	25833	hsa-miR-4492	POU2F3	molecular_function	sequence-specific DNA binding transcription factor activity
GO:0003700	2626	hsa-miR-4492	GATA4	molecular_function	sequence-specific DNA binding transcription factor activity
GO:0003700	27097	hsa-miR-4492	TAF5L	molecular_function	sequence-specific DNA binding transcription factor activity
GO:0003700	27125	hsa-miR-4492	AFF4	molecular_function	sequence-specific DNA binding transcription factor activity
GO:0003700	2737	hsa-miR-4492	GLI3	molecular_function	sequence-specific DNA binding transcription factor activity
GO:0003700	283078	hsa-miR-4492	MKX	molecular_function	sequence-specific DNA binding transcription factor activity
GO:0003700	28999	hsa-miR-4492	KLF15	molecular_function	sequence-specific DNA binding transcription factor activity
GO:0003700	2972	hsa-miR-4492	BRF1	molecular_function	sequence-specific DNA binding transcription factor activity
GO:0003700	29842	hsa-miR-4492	TFCP2L1	molecular_function	sequence-specific DNA binding transcription factor activity
GO:0003700	3054	hsa-miR-4492	HCFC1	molecular_function	sequence-specific DNA binding transcription factor activity
GO:0003700	3172	hsa-miR-4492	HNF4A	molecular_function	sequence-specific DNA binding transcription factor activity
GO:0003700	3195	hsa-miR-4492	TLX1	molecular_function	sequence-specific DNA binding transcription factor activity
GO:0003700	3198	hsa-miR-4492	HOXA1	molecular_function	sequence-specific DNA binding transcription factor activity
GO:0003700	3204	hsa-miR-4492	HOXA7	molecular_function	sequence-specific DNA binding transcription factor activity
GO:0003700	3207	hsa-miR-4492	HOXA11	molecular_function	sequence-specific DNA binding transcription factor activity
GO:0003700	3209	hsa-miR-4492	HOXA13	molecular_function	sequence-specific DNA binding transcription factor activity
GO:0003700	3211	hsa-miR-4492	HOXB1	molecular_function	sequence-specific DNA binding transcription factor activity
GO:0003700	3217	hsa-miR-4492	HOXB7	molecular_function	sequence-specific DNA binding transcription factor activity
GO:0003700	3223	hsa-miR-4492	HOXC6	molecular_function	sequence-specific DNA binding transcription factor activity
GO:0003700	3225	hsa-miR-4492	HOXC9	molecular_function	sequence-specific DNA binding transcription factor activity
GO:0003700	3231	hsa-miR-4492	HOXD1	molecular_function	sequence-specific DNA binding transcription factor activity
GO:0003700	3237	hsa-miR-4492	HOXD11	molecular_function	sequence-specific DNA binding transcription factor activity
GO:0003700	347344	hsa-miR-4492	ZNF81	molecular_function	sequence-specific DNA binding transcription factor activity
GO:0003700	347853	hsa-miR-4492	TBX10	molecular_function	sequence-specific DNA binding transcription factor activity
GO:0003700	353274	hsa-miR-4492	ZNF445	molecular_function	sequence-specific DNA binding transcription factor activity
GO:0003700	3659	hsa-miR-4492	IRF1	molecular_function	sequence-specific DNA binding transcription factor activity
GO:0003700	3660	hsa-miR-4492	IRF2	molecular_function	sequence-specific DNA binding transcription factor activity
GO:0003700	3662	hsa-miR-4492	IRF4	molecular_function	sequence-specific DNA binding transcription factor activity
GO:0003700	3663	hsa-miR-4492	IRF5	molecular_function	sequence-specific DNA binding transcription factor activity
GO:0003700	4010	hsa-miR-4492	LMX1B	molecular_function	sequence-specific DNA binding transcription factor activity
GO:0003700	4088	hsa-miR-4492	SMAD3	molecular_function	sequence-specific DNA binding transcription factor activity
GO:0003700	4090	hsa-miR-4492	SMAD5	molecular_function	sequence-specific DNA binding transcription factor activity
GO:0003700	4097	hsa-miR-4492	MAFG	molecular_function	sequence-specific DNA binding transcription factor activity
GO:0003700	4149	hsa-miR-4492	MAX	molecular_function	sequence-specific DNA binding transcription factor activity
GO:0003700	4335	hsa-miR-4492	MNT	molecular_function	sequence-specific DNA binding transcription factor activity
GO:0003700	4487	hsa-miR-4492	MSX1	molecular_function	sequence-specific DNA binding transcription factor activity
GO:0003700	4488	hsa-miR-4492	MSX2	molecular_function	sequence-specific DNA binding transcription factor activity
GO:0003700	4605	hsa-miR-4492	MYBL2	molecular_function	sequence-specific DNA binding transcription factor activity
GO:0003700	4610	hsa-miR-4492	MYCL1	molecular_function	sequence-specific DNA binding transcription factor activity
GO:0003700	4661	hsa-miR-4492	MYT1	molecular_function	sequence-specific DNA binding transcription factor activity
GO:0003700	467	hsa-miR-4492	ATF3	molecular_function	sequence-specific DNA binding transcription factor activity
GO:0003700	4772	hsa-miR-4492	NFATC1	molecular_function	sequence-specific DNA binding transcription factor activity
GO:0003700	4776	hsa-miR-4492	NFATC4	molecular_function	sequence-specific DNA binding transcription factor activity
GO:0003700	4782	hsa-miR-4492	NFIC	molecular_function	sequence-specific DNA binding transcription factor activity
GO:0003700	4791	hsa-miR-4492	NFKB2	molecular_function	sequence-specific DNA binding transcription factor activity
GO:0003700	4799	hsa-miR-4492	NFX1	molecular_function	sequence-specific DNA binding transcription factor activity
GO:0003700	4800	hsa-miR-4492	NFYA	molecular_function	sequence-specific DNA binding transcription factor activity
GO:0003700	4901	hsa-miR-4492	NRL	molecular_function	sequence-specific DNA binding transcription factor activity
GO:0003700	5077	hsa-miR-4492	PAX3	molecular_function	sequence-specific DNA binding transcription factor activity
GO:0003700	5079	hsa-miR-4492	PAX5	molecular_function	sequence-specific DNA binding transcription factor activity
GO:0003700	5081	hsa-miR-4492	PAX7	molecular_function	sequence-specific DNA binding transcription factor activity
GO:0003700	51222	hsa-miR-4492	ZNF219	molecular_function	sequence-specific DNA binding transcription factor activity
GO:0003700	51513	hsa-miR-4492	ETV7	molecular_function	sequence-specific DNA binding transcription factor activity
GO:0003700	51804	hsa-miR-4492	SIX4	molecular_function	sequence-specific DNA binding transcription factor activity
GO:0003700	5201	hsa-miR-4492	PFDN1	molecular_function	sequence-specific DNA binding transcription factor activity
GO:0003700	5307	hsa-miR-4492	PITX1	molecular_function	sequence-specific DNA binding transcription factor activity
GO:0003700	5309	hsa-miR-4492	PITX3	molecular_function	sequence-specific DNA binding transcription factor activity
GO:0003700	5326	hsa-miR-4492	PLAGL2	molecular_function	sequence-specific DNA binding transcription factor activity
GO:0003700	5451	hsa-miR-4492	POU2F1	molecular_function	sequence-specific DNA binding transcription factor activity
GO:0003700	5452	hsa-miR-4492	POU2F2	molecular_function	sequence-specific DNA binding transcription factor activity
GO:0003700	5453	hsa-miR-4492	POU3F1	molecular_function	sequence-specific DNA binding transcription factor activity
GO:0003700	5467	hsa-miR-4492	PPARD	molecular_function	sequence-specific DNA binding transcription factor activity
GO:0003700	54815	hsa-miR-4492	GATAD2A	molecular_function	sequence-specific DNA binding transcription factor activity
GO:0003700	54993	hsa-miR-4492	ZSCAN2	molecular_function	sequence-specific DNA binding transcription factor activity
GO:0003700	55502	hsa-miR-4492	HES6	molecular_function	sequence-specific DNA binding transcription factor activity
GO:0003700	55810	hsa-miR-4492	FOXJ2	molecular_function	sequence-specific DNA binding transcription factor activity
GO:0003700	55892	hsa-miR-4492	MYNN	molecular_function	sequence-specific DNA binding transcription factor activity
GO:0003700	56033	hsa-miR-4492	BARX1	molecular_function	sequence-specific DNA binding transcription factor activity
GO:0003700	56751	hsa-miR-4492	BARHL1	molecular_function	sequence-specific DNA binding transcription factor activity
GO:0003700	57459	hsa-miR-4492	GATAD2B	molecular_function	sequence-specific DNA binding transcription factor activity
GO:0003700	5814	hsa-miR-4492	PURB	molecular_function	sequence-specific DNA binding transcription factor activity
GO:0003700	5914	hsa-miR-4492	RARA	molecular_function	sequence-specific DNA binding transcription factor activity
GO:0003700	604	hsa-miR-4492	BCL6	molecular_function	sequence-specific DNA binding transcription factor activity
GO:0003700	60436	hsa-miR-4492	TGIF2	molecular_function	sequence-specific DNA binding transcription factor activity
GO:0003700	6047	hsa-miR-4492	RNF4	molecular_function	sequence-specific DNA binding transcription factor activity
GO:0003700	60529	hsa-miR-4492	ALX4	molecular_function	sequence-specific DNA binding transcription factor activity
GO:0003700	6097	hsa-miR-4492	RORC	molecular_function	sequence-specific DNA binding transcription factor activity
GO:0003700	6256	hsa-miR-4492	RXRA	molecular_function	sequence-specific DNA binding transcription factor activity
GO:0003700	6257	hsa-miR-4492	RXRB	molecular_function	sequence-specific DNA binding transcription factor activity
GO:0003700	63876	hsa-miR-4492	PKNOX2	molecular_function	sequence-specific DNA binding transcription factor activity
GO:0003700	63950	hsa-miR-4492	DMRTA2	molecular_function	sequence-specific DNA binding transcription factor activity
GO:0003700	64651	hsa-miR-4492	CSRNP1	molecular_function	sequence-specific DNA binding transcription factor activity
GO:0003700	65982	hsa-miR-4492	ZSCAN18	molecular_function	sequence-specific DNA binding transcription factor activity
GO:0003700	6650	hsa-miR-4492	SOLH	molecular_function	sequence-specific DNA binding transcription factor activity
GO:0003700	6660	hsa-miR-4492	SOX5	molecular_function	sequence-specific DNA binding transcription factor activity
GO:0003700	6662	hsa-miR-4492	SOX9	molecular_function	sequence-specific DNA binding transcription factor activity
GO:0003700	6722	hsa-miR-4492	SRF	molecular_function	sequence-specific DNA binding transcription factor activity
GO:0003700	677	hsa-miR-4492	ZFP36L1	molecular_function	sequence-specific DNA binding transcription factor activity
GO:0003700	6774	hsa-miR-4492	STAT3	molecular_function	sequence-specific DNA binding transcription factor activity
GO:0003700	678	hsa-miR-4492	ZFP36L2	molecular_function	sequence-specific DNA binding transcription factor activity
GO:0003700	6886	hsa-miR-4492	TAL1	molecular_function	sequence-specific DNA binding transcription factor activity
GO:0003700	6899	hsa-miR-4492	TBX1	molecular_function	sequence-specific DNA binding transcription factor activity
GO:0003700	6910	hsa-miR-4492	TBX5	molecular_function	sequence-specific DNA binding transcription factor activity
GO:0003700	6925	hsa-miR-4492	TCF4	molecular_function	sequence-specific DNA binding transcription factor activity
GO:0003700	6927	hsa-miR-4492	HNF1A	molecular_function	sequence-specific DNA binding transcription factor activity
GO:0003700	6938	hsa-miR-4492	TCF12	molecular_function	sequence-specific DNA binding transcription factor activity
GO:0003700	6945	hsa-miR-4492	MLX	molecular_function	sequence-specific DNA binding transcription factor activity
GO:0003700	7003	hsa-miR-4492	TEAD1	molecular_function	sequence-specific DNA binding transcription factor activity
GO:0003700	7020	hsa-miR-4492	TFAP2A	molecular_function	sequence-specific DNA binding transcription factor activity
GO:0003700	7029	hsa-miR-4492	TFDP2	molecular_function	sequence-specific DNA binding transcription factor activity
GO:0003700	7030	hsa-miR-4492	TFE3	molecular_function	sequence-specific DNA binding transcription factor activity
GO:0003700	7067	hsa-miR-4492	THRA	molecular_function	sequence-specific DNA binding transcription factor activity
GO:0003700	7161	hsa-miR-4492	TP73	molecular_function	sequence-specific DNA binding transcription factor activity
GO:0003700	7182	hsa-miR-4492	NR2C2	molecular_function	sequence-specific DNA binding transcription factor activity
GO:0003700	7227	hsa-miR-4492	TRPS1	molecular_function	sequence-specific DNA binding transcription factor activity
GO:0003700	7290	hsa-miR-4492	HIRA	molecular_function	sequence-specific DNA binding transcription factor activity
GO:0003700	7392	hsa-miR-4492	USF2	molecular_function	sequence-specific DNA binding transcription factor activity
GO:0003700	7421	hsa-miR-4492	VDR	molecular_function	sequence-specific DNA binding transcription factor activity
GO:0003700	745	hsa-miR-4492	C11orf9	molecular_function	sequence-specific DNA binding transcription factor activity
GO:0003700	7566	hsa-miR-4492	ZNF18	molecular_function	sequence-specific DNA binding transcription factor activity
GO:0003700	7691	hsa-miR-4492	ZNF132	molecular_function	sequence-specific DNA binding transcription factor activity
GO:0003700	7711	hsa-miR-4492	ZNF155	molecular_function	sequence-specific DNA binding transcription factor activity
GO:0003700	7799	hsa-miR-4492	PRDM2	molecular_function	sequence-specific DNA binding transcription factor activity
GO:0003700	7849	hsa-miR-4492	PAX8	molecular_function	sequence-specific DNA binding transcription factor activity
GO:0003700	79603	hsa-miR-4492	LASS4	molecular_function	sequence-specific DNA binding transcription factor activity
GO:0003700	80034	hsa-miR-4492	CSRNP3	molecular_function	sequence-specific DNA binding transcription factor activity
GO:0003700	8022	hsa-miR-4492	LHX3	molecular_function	sequence-specific DNA binding transcription factor activity
GO:0003700	80317	hsa-miR-4492	ZKSCAN3	molecular_function	sequence-specific DNA binding transcription factor activity
GO:0003700	8061	hsa-miR-4492	FOSL1	molecular_function	sequence-specific DNA binding transcription factor activity
GO:0003700	81566	hsa-miR-4492	CSRNP2	molecular_function	sequence-specific DNA binding transcription factor activity
GO:0003700	83439	hsa-miR-4492	TCF7L1	molecular_function	sequence-specific DNA binding transcription factor activity
GO:0003700	83482	hsa-miR-4492	SCRT1	molecular_function	sequence-specific DNA binding transcription factor activity
GO:0003700	83595	hsa-miR-4492	SOX7	molecular_function	sequence-specific DNA binding transcription factor activity
GO:0003700	83855	hsa-miR-4492	KLF16	molecular_function	sequence-specific DNA binding transcription factor activity
GO:0003700	8521	hsa-miR-4492	GCM1	molecular_function	sequence-specific DNA binding transcription factor activity
GO:0003700	8538	hsa-miR-4492	BARX2	molecular_function	sequence-specific DNA binding transcription factor activity
GO:0003700	860	hsa-miR-4492	RUNX2	molecular_function	sequence-specific DNA binding transcription factor activity
GO:0003700	861	hsa-miR-4492	RUNX1	molecular_function	sequence-specific DNA binding transcription factor activity
GO:0003700	862	hsa-miR-4492	RUNX1T1	molecular_function	sequence-specific DNA binding transcription factor activity
GO:0003700	8626	hsa-miR-4492	TP63	molecular_function	sequence-specific DNA binding transcription factor activity
GO:0003700	864	hsa-miR-4492	RUNX3	molecular_function	sequence-specific DNA binding transcription factor activity
GO:0003700	8721	hsa-miR-4492	EDF1	molecular_function	sequence-specific DNA binding transcription factor activity
GO:0003700	8929	hsa-miR-4492	PHOX2B	molecular_function	sequence-specific DNA binding transcription factor activity
GO:0003700	9031	hsa-miR-4492	BAZ1B	molecular_function	sequence-specific DNA binding transcription factor activity
GO:0003700	90993	hsa-miR-4492	CREB3L1	molecular_function	sequence-specific DNA binding transcription factor activity
GO:0003700	9112	hsa-miR-4492	MTA1	molecular_function	sequence-specific DNA binding transcription factor activity
GO:0003700	91464	hsa-miR-4492	ISX	molecular_function	sequence-specific DNA binding transcription factor activity
GO:0003700	93986	hsa-miR-4492	FOXP2	molecular_function	sequence-specific DNA binding transcription factor activity
GO:0003700	9421	hsa-miR-4492	HAND1	molecular_function	sequence-specific DNA binding transcription factor activity
GO:0003700	9480	hsa-miR-4492	ONECUT2	molecular_function	sequence-specific DNA binding transcription factor activity
GO:0003700	9575	hsa-miR-4492	CLOCK	molecular_function	sequence-specific DNA binding transcription factor activity
GO:0003700	9757	hsa-miR-4492	MLL4	molecular_function	sequence-specific DNA binding transcription factor activity
GO:0003700	9915	hsa-miR-4492	ARNT2	molecular_function	sequence-specific DNA binding transcription factor activity
GO:0003700	10481	hsa-miR-3195	HOXB13	molecular_function	sequence-specific DNA binding transcription factor activity
GO:0003700	117581	hsa-miR-3195	TWIST2	molecular_function	sequence-specific DNA binding transcription factor activity
GO:0003700	1482	hsa-miR-3195	NKX2-5	molecular_function	sequence-specific DNA binding transcription factor activity
GO:0003700	23440	hsa-miR-3195	OTP	molecular_function	sequence-specific DNA binding transcription factor activity
GO:0003700	2972	hsa-miR-3195	BRF1	molecular_function	sequence-specific DNA binding transcription factor activity
GO:0003700	30012	hsa-miR-3195	TLX3	molecular_function	sequence-specific DNA binding transcription factor activity
GO:0003700	3216	hsa-miR-3195	HOXB6	molecular_function	sequence-specific DNA binding transcription factor activity
GO:0003700	3225	hsa-miR-3195	HOXC9	molecular_function	sequence-specific DNA binding transcription factor activity
GO:0003700	4297	hsa-miR-3195	MLL	molecular_function	sequence-specific DNA binding transcription factor activity
GO:0003700	50805	hsa-miR-3195	IRX4	molecular_function	sequence-specific DNA binding transcription factor activity
GO:0003700	51043	hsa-miR-3195	ZBTB7B	molecular_function	sequence-specific DNA binding transcription factor activity
GO:0003700	5453	hsa-miR-3195	POU3F1	molecular_function	sequence-specific DNA binding transcription factor activity
GO:0003700	579	hsa-miR-3195	NKX3-2	molecular_function	sequence-specific DNA binding transcription factor activity
GO:0003700	6656	hsa-miR-3195	SOX1	molecular_function	sequence-specific DNA binding transcription factor activity
GO:0003700	6659	hsa-miR-3195	SOX4	molecular_function	sequence-specific DNA binding transcription factor activity
GO:0003700	6899	hsa-miR-3195	TBX1	molecular_function	sequence-specific DNA binding transcription factor activity
GO:0003700	10002	hsa-miR-4281	NR2E3	molecular_function	sequence-specific DNA binding transcription factor activity
GO:0003700	10725	hsa-miR-4281	NFAT5	molecular_function	sequence-specific DNA binding transcription factor activity
GO:0003700	10795	hsa-miR-4281	ZNF268	molecular_function	sequence-specific DNA binding transcription factor activity
GO:0003700	11023	hsa-miR-4281	VAX1	molecular_function	sequence-specific DNA binding transcription factor activity
GO:0003700	122953	hsa-miR-4281	JDP2	molecular_function	sequence-specific DNA binding transcription factor activity
GO:0003700	128553	hsa-miR-4281	TSHZ2	molecular_function	sequence-specific DNA binding transcription factor activity
GO:0003700	1406	hsa-miR-4281	CRX	molecular_function	sequence-specific DNA binding transcription factor activity
GO:0003700	1750	hsa-miR-4281	DLX6	molecular_function	sequence-specific DNA binding transcription factor activity
GO:0003700	1870	hsa-miR-4281	E2F2	molecular_function	sequence-specific DNA binding transcription factor activity
GO:0003700	1998	hsa-miR-4281	ELF2	molecular_function	sequence-specific DNA binding transcription factor activity
GO:0003700	1999	hsa-miR-4281	ELF3	molecular_function	sequence-specific DNA binding transcription factor activity
GO:0003700	2122	hsa-miR-4281	MECOM	molecular_function	sequence-specific DNA binding transcription factor activity
GO:0003700	2309	hsa-miR-4281	FOXO3	molecular_function	sequence-specific DNA binding transcription factor activity
GO:0003700	23764	hsa-miR-4281	MAFF	molecular_function	sequence-specific DNA binding transcription factor activity
GO:0003700	253782	hsa-miR-4281	LASS6	molecular_function	sequence-specific DNA binding transcription factor activity
GO:0003700	25803	hsa-miR-4281	SPDEF	molecular_function	sequence-specific DNA binding transcription factor activity
GO:0003700	26013	hsa-miR-4281	L3MBTL	molecular_function	sequence-specific DNA binding transcription factor activity
GO:0003700	27022	hsa-miR-4281	FOXD3	molecular_function	sequence-specific DNA binding transcription factor activity
GO:0003700	2969	hsa-miR-4281	GTF2I	molecular_function	sequence-specific DNA binding transcription factor activity
GO:0003700	29956	hsa-miR-4281	LASS2	molecular_function	sequence-specific DNA binding transcription factor activity
GO:0003700	30812	hsa-miR-4281	SOX8	molecular_function	sequence-specific DNA binding transcription factor activity
GO:0003700	3237	hsa-miR-4281	HOXD11	molecular_function	sequence-specific DNA binding transcription factor activity
GO:0003700	3663	hsa-miR-4281	IRF5	molecular_function	sequence-specific DNA binding transcription factor activity
GO:0003700	401	hsa-miR-4281	PHOX2A	molecular_function	sequence-specific DNA binding transcription factor activity
GO:0003700	4152	hsa-miR-4281	MBD1	molecular_function	sequence-specific DNA binding transcription factor activity
GO:0003700	4335	hsa-miR-4281	MNT	molecular_function	sequence-specific DNA binding transcription factor activity
GO:0003700	4762	hsa-miR-4281	NEUROG1	molecular_function	sequence-specific DNA binding transcription factor activity
GO:0003700	4821	hsa-miR-4281	NKX2-2	molecular_function	sequence-specific DNA binding transcription factor activity
GO:0003700	5013	hsa-miR-4281	OTX1	molecular_function	sequence-specific DNA binding transcription factor activity
GO:0003700	50943	hsa-miR-4281	FOXP3	molecular_function	sequence-specific DNA binding transcription factor activity
GO:0003700	51043	hsa-miR-4281	ZBTB7B	molecular_function	sequence-specific DNA binding transcription factor activity
GO:0003700	5396	hsa-miR-4281	PRRX1	molecular_function	sequence-specific DNA binding transcription factor activity
GO:0003700	5457	hsa-miR-4281	POU4F1	molecular_function	sequence-specific DNA binding transcription factor activity
GO:0003700	54738	hsa-miR-4281	FEV	molecular_function	sequence-specific DNA binding transcription factor activity
GO:0003700	54993	hsa-miR-4281	ZSCAN2	molecular_function	sequence-specific DNA binding transcription factor activity
GO:0003700	58487	hsa-miR-4281	CREBZF	molecular_function	sequence-specific DNA binding transcription factor activity
GO:0003700	602	hsa-miR-4281	BCL3	molecular_function	sequence-specific DNA binding transcription factor activity
GO:0003700	60436	hsa-miR-4281	TGIF2	molecular_function	sequence-specific DNA binding transcription factor activity
GO:0003700	6097	hsa-miR-4281	RORC	molecular_function	sequence-specific DNA binding transcription factor activity
GO:0003700	64211	hsa-miR-4281	LHX5	molecular_function	sequence-specific DNA binding transcription factor activity
GO:0003700	6473	hsa-miR-4281	SHOX	molecular_function	sequence-specific DNA binding transcription factor activity
GO:0003700	6656	hsa-miR-4281	SOX1	molecular_function	sequence-specific DNA binding transcription factor activity
GO:0003700	6664	hsa-miR-4281	SOX11	molecular_function	sequence-specific DNA binding transcription factor activity
GO:0003700	668	hsa-miR-4281	FOXL2	molecular_function	sequence-specific DNA binding transcription factor activity
GO:0003700	6911	hsa-miR-4281	TBX6	molecular_function	sequence-specific DNA binding transcription factor activity
GO:0003700	6934	hsa-miR-4281	TCF7L2	molecular_function	sequence-specific DNA binding transcription factor activity
GO:0003700	7020	hsa-miR-4281	TFAP2A	molecular_function	sequence-specific DNA binding transcription factor activity
GO:0003700	7551	hsa-miR-4281	ZNF3	molecular_function	sequence-specific DNA binding transcription factor activity
GO:0003700	7582	hsa-miR-4281	ZNF33B	molecular_function	sequence-specific DNA binding transcription factor activity
GO:0003700	7694	hsa-miR-4281	ZNF135	molecular_function	sequence-specific DNA binding transcription factor activity
GO:0003700	7799	hsa-miR-4281	PRDM2	molecular_function	sequence-specific DNA binding transcription factor activity
GO:0003700	79618	hsa-miR-4281	HMBOX1	molecular_function	sequence-specific DNA binding transcription factor activity
GO:0003700	81566	hsa-miR-4281	CSRNP2	molecular_function	sequence-specific DNA binding transcription factor activity
GO:0003700	84307	hsa-miR-4281	ZNF397	molecular_function	sequence-specific DNA binding transcription factor activity
GO:0003700	84839	hsa-miR-4281	RAX2	molecular_function	sequence-specific DNA binding transcription factor activity
GO:0003700	8522	hsa-miR-4281	GAS7	molecular_function	sequence-specific DNA binding transcription factor activity
GO:0003700	860	hsa-miR-4281	RUNX2	molecular_function	sequence-specific DNA binding transcription factor activity
GO:0003700	867	hsa-miR-4281	CBL	molecular_function	sequence-specific DNA binding transcription factor activity
GO:0003700	8848	hsa-miR-4281	TSC22D1	molecular_function	sequence-specific DNA binding transcription factor activity
GO:0003700	9496	hsa-miR-4281	TBX4	molecular_function	sequence-specific DNA binding transcription factor activity
GO:0003700	9970	hsa-miR-4281	NR1I3	molecular_function	sequence-specific DNA binding transcription factor activity
GO:0003700	100101467	hsa-miR-5096	ZNF397OS	molecular_function	sequence-specific DNA binding transcription factor activity
GO:0003700	10168	hsa-miR-5096	ZNF197	molecular_function	sequence-specific DNA binding transcription factor activity
GO:0003700	10463	hsa-miR-5096	SLC30A9	molecular_function	sequence-specific DNA binding transcription factor activity
GO:0003700	10691	hsa-miR-5096	GMEB1	molecular_function	sequence-specific DNA binding transcription factor activity
GO:0003700	10795	hsa-miR-5096	ZNF268	molecular_function	sequence-specific DNA binding transcription factor activity
GO:0003700	1112	hsa-miR-5096	FOXN3	molecular_function	sequence-specific DNA binding transcription factor activity
GO:0003700	11179	hsa-miR-5096	ZNF277	molecular_function	sequence-specific DNA binding transcription factor activity
GO:0003700	11244	hsa-miR-5096	ZHX1	molecular_function	sequence-specific DNA binding transcription factor activity
GO:0003700	128209	hsa-miR-5096	KLF17	molecular_function	sequence-specific DNA binding transcription factor activity
GO:0003700	128553	hsa-miR-5096	TSHZ2	molecular_function	sequence-specific DNA binding transcription factor activity
GO:0003700	139324	hsa-miR-5096	HDX	molecular_function	sequence-specific DNA binding transcription factor activity
GO:0003700	1406	hsa-miR-5096	CRX	molecular_function	sequence-specific DNA binding transcription factor activity
GO:0003700	153222	hsa-miR-5096	C5orf41	molecular_function	sequence-specific DNA binding transcription factor activity
GO:0003700	1750	hsa-miR-5096	DLX6	molecular_function	sequence-specific DNA binding transcription factor activity
GO:0003700	1811	hsa-miR-5096	SLC26A3	molecular_function	sequence-specific DNA binding transcription factor activity
GO:0003700	1827	hsa-miR-5096	RCAN1	molecular_function	sequence-specific DNA binding transcription factor activity
GO:0003700	1959	hsa-miR-5096	EGR2	molecular_function	sequence-specific DNA binding transcription factor activity
GO:0003700	196	hsa-miR-5096	AHR	molecular_function	sequence-specific DNA binding transcription factor activity
GO:0003700	1960	hsa-miR-5096	EGR3	molecular_function	sequence-specific DNA binding transcription factor activity
GO:0003700	2020	hsa-miR-5096	EN2	molecular_function	sequence-specific DNA binding transcription factor activity
GO:0003700	2078	hsa-miR-5096	ERG	molecular_function	sequence-specific DNA binding transcription factor activity
GO:0003700	2115	hsa-miR-5096	ETV1	molecular_function	sequence-specific DNA binding transcription factor activity
GO:0003700	221937	hsa-miR-5096	FOXK1	molecular_function	sequence-specific DNA binding transcription factor activity
GO:0003700	222696	hsa-miR-5096	ZSCAN23	molecular_function	sequence-specific DNA binding transcription factor activity
GO:0003700	22797	hsa-miR-5096	TFEC	molecular_function	sequence-specific DNA binding transcription factor activity
GO:0003700	2305	hsa-miR-5096	FOXM1	molecular_function	sequence-specific DNA binding transcription factor activity
GO:0003700	23394	hsa-miR-5096	ADNP	molecular_function	sequence-specific DNA binding transcription factor activity
GO:0003700	23435	hsa-miR-5096	TARDBP	molecular_function	sequence-specific DNA binding transcription factor activity
GO:0003700	23764	hsa-miR-5096	MAFF	molecular_function	sequence-specific DNA binding transcription factor activity
GO:0003700	253461	hsa-miR-5096	ZBTB38	molecular_function	sequence-specific DNA binding transcription factor activity
GO:0003700	253782	hsa-miR-5096	LASS6	molecular_function	sequence-specific DNA binding transcription factor activity
GO:0003700	25819	hsa-miR-5096	CCRN4L	molecular_function	sequence-specific DNA binding transcription factor activity
GO:0003700	2625	hsa-miR-5096	GATA3	molecular_function	sequence-specific DNA binding transcription factor activity
GO:0003700	2626	hsa-miR-5096	GATA4	molecular_function	sequence-specific DNA binding transcription factor activity
GO:0003700	26298	hsa-miR-5096	EHF	molecular_function	sequence-specific DNA binding transcription factor activity
GO:0003700	28999	hsa-miR-5096	KLF15	molecular_function	sequence-specific DNA binding transcription factor activity
GO:0003700	2908	hsa-miR-5096	NR3C1	molecular_function	sequence-specific DNA binding transcription factor activity
GO:0003700	2966	hsa-miR-5096	GTF2H2	molecular_function	sequence-specific DNA binding transcription factor activity
GO:0003700	3065	hsa-miR-5096	HDAC1	molecular_function	sequence-specific DNA binding transcription factor activity
GO:0003700	3066	hsa-miR-5096	HDAC2	molecular_function	sequence-specific DNA binding transcription factor activity
GO:0003700	3174	hsa-miR-5096	HNF4G	molecular_function	sequence-specific DNA binding transcription factor activity
GO:0003700	3195	hsa-miR-5096	TLX1	molecular_function	sequence-specific DNA binding transcription factor activity
GO:0003700	3198	hsa-miR-5096	HOXA1	molecular_function	sequence-specific DNA binding transcription factor activity
GO:0003700	3201	hsa-miR-5096	HOXA4	molecular_function	sequence-specific DNA binding transcription factor activity
GO:0003700	3209	hsa-miR-5096	HOXA13	molecular_function	sequence-specific DNA binding transcription factor activity
GO:0003700	343472	hsa-miR-5096	BARHL2	molecular_function	sequence-specific DNA binding transcription factor activity
GO:0003700	347853	hsa-miR-5096	TBX10	molecular_function	sequence-specific DNA binding transcription factor activity
GO:0003700	353274	hsa-miR-5096	ZNF445	molecular_function	sequence-specific DNA binding transcription factor activity
GO:0003700	3659	hsa-miR-5096	IRF1	molecular_function	sequence-specific DNA binding transcription factor activity
GO:0003700	3660	hsa-miR-5096	IRF2	molecular_function	sequence-specific DNA binding transcription factor activity
GO:0003700	3662	hsa-miR-5096	IRF4	molecular_function	sequence-specific DNA binding transcription factor activity
GO:0003700	3670	hsa-miR-5096	ISL1	molecular_function	sequence-specific DNA binding transcription factor activity
GO:0003700	4009	hsa-miR-5096	LMX1A	molecular_function	sequence-specific DNA binding transcription factor activity
GO:0003700	4093	hsa-miR-5096	SMAD9	molecular_function	sequence-specific DNA binding transcription factor activity
GO:0003700	4205	hsa-miR-5096	MEF2A	molecular_function	sequence-specific DNA binding transcription factor activity
GO:0003700	431707	hsa-miR-5096	LHX8	molecular_function	sequence-specific DNA binding transcription factor activity
GO:0003700	4488	hsa-miR-5096	MSX2	molecular_function	sequence-specific DNA binding transcription factor activity
GO:0003700	4520	hsa-miR-5096	MTF1	molecular_function	sequence-specific DNA binding transcription factor activity
GO:0003700	4762	hsa-miR-5096	NEUROG1	molecular_function	sequence-specific DNA binding transcription factor activity
GO:0003700	4772	hsa-miR-5096	NFATC1	molecular_function	sequence-specific DNA binding transcription factor activity
GO:0003700	4774	hsa-miR-5096	NFIA	molecular_function	sequence-specific DNA binding transcription factor activity
GO:0003700	4801	hsa-miR-5096	NFYB	molecular_function	sequence-specific DNA binding transcription factor activity
GO:0003700	4862	hsa-miR-5096	NPAS2	molecular_function	sequence-specific DNA binding transcription factor activity
GO:0003700	503582	hsa-miR-5096	ARGFX	molecular_function	sequence-specific DNA binding transcription factor activity
GO:0003700	5090	hsa-miR-5096	PBX3	molecular_function	sequence-specific DNA binding transcription factor activity
GO:0003700	50945	hsa-miR-5096	TBX22	molecular_function	sequence-specific DNA binding transcription factor activity
GO:0003700	51351	hsa-miR-5096	ZNF117	molecular_function	sequence-specific DNA binding transcription factor activity
GO:0003700	51804	hsa-miR-5096	SIX4	molecular_function	sequence-specific DNA binding transcription factor activity
GO:0003700	5241	hsa-miR-5096	PGR	molecular_function	sequence-specific DNA binding transcription factor activity
GO:0003700	5451	hsa-miR-5096	POU2F1	molecular_function	sequence-specific DNA binding transcription factor activity
GO:0003700	5452	hsa-miR-5096	POU2F2	molecular_function	sequence-specific DNA binding transcription factor activity
GO:0003700	5454	hsa-miR-5096	POU3F2	molecular_function	sequence-specific DNA binding transcription factor activity
GO:0003700	5463	hsa-miR-5096	POU6F1	molecular_function	sequence-specific DNA binding transcription factor activity
GO:0003700	5465	hsa-miR-5096	PPARA	molecular_function	sequence-specific DNA binding transcription factor activity
GO:0003700	5467	hsa-miR-5096	PPARD	molecular_function	sequence-specific DNA binding transcription factor activity
GO:0003700	5468	hsa-miR-5096	PPARG	molecular_function	sequence-specific DNA binding transcription factor activity
GO:0003700	54738	hsa-miR-5096	FEV	molecular_function	sequence-specific DNA binding transcription factor activity
GO:0003700	571	hsa-miR-5096	BACH1	molecular_function	sequence-specific DNA binding transcription factor activity
GO:0003700	57109	hsa-miR-5096	REXO4	molecular_function	sequence-specific DNA binding transcription factor activity
GO:0003700	57336	hsa-miR-5096	ZNF287	molecular_function	sequence-specific DNA binding transcription factor activity
GO:0003700	5814	hsa-miR-5096	PURB	molecular_function	sequence-specific DNA binding transcription factor activity
GO:0003700	5927	hsa-miR-5096	KDM5A	molecular_function	sequence-specific DNA binding transcription factor activity
GO:0003700	5966	hsa-miR-5096	REL	molecular_function	sequence-specific DNA binding transcription factor activity
GO:0003700	6095	hsa-miR-5096	RORA	molecular_function	sequence-specific DNA binding transcription factor activity
GO:0003700	6097	hsa-miR-5096	RORC	molecular_function	sequence-specific DNA binding transcription factor activity
GO:0003700	6256	hsa-miR-5096	RXRA	molecular_function	sequence-specific DNA binding transcription factor activity
GO:0003700	6304	hsa-miR-5096	SATB1	molecular_function	sequence-specific DNA binding transcription factor activity
GO:0003700	63946	hsa-miR-5096	DMRTC2	molecular_function	sequence-specific DNA binding transcription factor activity
GO:0003700	63950	hsa-miR-5096	DMRTA2	molecular_function	sequence-specific DNA binding transcription factor activity
GO:0003700	646	hsa-miR-5096	BNC1	molecular_function	sequence-specific DNA binding transcription factor activity
GO:0003700	6495	hsa-miR-5096	SIX1	molecular_function	sequence-specific DNA binding transcription factor activity
GO:0003700	6656	hsa-miR-5096	SOX1	molecular_function	sequence-specific DNA binding transcription factor activity
GO:0003700	6657	hsa-miR-5096	SOX2	molecular_function	sequence-specific DNA binding transcription factor activity
GO:0003700	6659	hsa-miR-5096	SOX4	molecular_function	sequence-specific DNA binding transcription factor activity
GO:0003700	6660	hsa-miR-5096	SOX5	molecular_function	sequence-specific DNA binding transcription factor activity
GO:0003700	6667	hsa-miR-5096	SP1	molecular_function	sequence-specific DNA binding transcription factor activity
GO:0003700	6777	hsa-miR-5096	STAT5B	molecular_function	sequence-specific DNA binding transcription factor activity
GO:0003700	678	hsa-miR-5096	ZFP36L2	molecular_function	sequence-specific DNA binding transcription factor activity
GO:0003700	6827	hsa-miR-5096	SUPT4H1	molecular_function	sequence-specific DNA binding transcription factor activity
GO:0003700	6862	hsa-miR-5096	T	molecular_function	sequence-specific DNA binding transcription factor activity
GO:0003700	6871	hsa-miR-5096	TADA2A	molecular_function	sequence-specific DNA binding transcription factor activity
GO:0003700	6875	hsa-miR-5096	TAF4B	molecular_function	sequence-specific DNA binding transcription factor activity
GO:0003700	6886	hsa-miR-5096	TAL1	molecular_function	sequence-specific DNA binding transcription factor activity
GO:0003700	6925	hsa-miR-5096	TCF4	molecular_function	sequence-specific DNA binding transcription factor activity
GO:0003700	6945	hsa-miR-5096	MLX	molecular_function	sequence-specific DNA binding transcription factor activity
GO:0003700	7020	hsa-miR-5096	TFAP2A	molecular_function	sequence-specific DNA binding transcription factor activity
GO:0003700	7071	hsa-miR-5096	KLF10	molecular_function	sequence-specific DNA binding transcription factor activity
GO:0003700	7161	hsa-miR-5096	TP73	molecular_function	sequence-specific DNA binding transcription factor activity
GO:0003700	745	hsa-miR-5096	C11orf9	molecular_function	sequence-specific DNA binding transcription factor activity
GO:0003700	7490	hsa-miR-5096	WT1	molecular_function	sequence-specific DNA binding transcription factor activity
GO:0003700	7566	hsa-miR-5096	ZNF18	molecular_function	sequence-specific DNA binding transcription factor activity
GO:0003700	7581	hsa-miR-5096	ZNF33A	molecular_function	sequence-specific DNA binding transcription factor activity
GO:0003700	7582	hsa-miR-5096	ZNF33B	molecular_function	sequence-specific DNA binding transcription factor activity
GO:0003700	7626	hsa-miR-5096	ZNF75D	molecular_function	sequence-specific DNA binding transcription factor activity
GO:0003700	7697	hsa-miR-5096	ZNF138	molecular_function	sequence-specific DNA binding transcription factor activity
GO:0003700	7699	hsa-miR-5096	ZNF140	molecular_function	sequence-specific DNA binding transcription factor activity
GO:0003700	7706	hsa-miR-5096	TRIM25	molecular_function	sequence-specific DNA binding transcription factor activity
GO:0003700	7760	hsa-miR-5096	ZNF213	molecular_function	sequence-specific DNA binding transcription factor activity
GO:0003700	7764	hsa-miR-5096	ZNF217	molecular_function	sequence-specific DNA binding transcription factor activity
GO:0003700	7776	hsa-miR-5096	ZNF236	molecular_function	sequence-specific DNA binding transcription factor activity
GO:0003700	79364	hsa-miR-5096	ZXDC	molecular_function	sequence-specific DNA binding transcription factor activity
GO:0003700	80034	hsa-miR-5096	CSRNP3	molecular_function	sequence-specific DNA binding transcription factor activity
GO:0003700	8013	hsa-miR-5096	NR4A3	molecular_function	sequence-specific DNA binding transcription factor activity
GO:0003700	8028	hsa-miR-5096	MLLT10	molecular_function	sequence-specific DNA binding transcription factor activity
GO:0003700	83595	hsa-miR-5096	SOX7	molecular_function	sequence-specific DNA binding transcription factor activity
GO:0003700	84307	hsa-miR-5096	ZNF397	molecular_function	sequence-specific DNA binding transcription factor activity
GO:0003700	84458	hsa-miR-5096	LCOR	molecular_function	sequence-specific DNA binding transcription factor activity
GO:0003700	865	hsa-miR-5096	CBFB	molecular_function	sequence-specific DNA binding transcription factor activity
GO:0003700	867	hsa-miR-5096	CBL	molecular_function	sequence-specific DNA binding transcription factor activity
GO:0003700	91133	hsa-miR-5096	L3MBTL4	molecular_function	sequence-specific DNA binding transcription factor activity
GO:0003700	9139	hsa-miR-5096	CBFA2T2	molecular_function	sequence-specific DNA binding transcription factor activity
GO:0006355	10320	hsa-miR-638	IKZF1	biological_process	regulation of transcription, DNA-dependent
GO:0006355	10481	hsa-miR-638	HOXB13	biological_process	regulation of transcription, DNA-dependent
GO:0006355	10781	hsa-miR-638	ZNF266	biological_process	regulation of transcription, DNA-dependent
GO:0006355	10838	hsa-miR-638	ZNF275	biological_process	regulation of transcription, DNA-dependent
GO:0006355	1316	hsa-miR-638	KLF6	biological_process	regulation of transcription, DNA-dependent
GO:0006355	162239	hsa-miR-638	ZFP1	biological_process	regulation of transcription, DNA-dependent
GO:0006355	169841	hsa-miR-638	ZNF169	biological_process	regulation of transcription, DNA-dependent
GO:0006355	2306	hsa-miR-638	FOXD2	biological_process	regulation of transcription, DNA-dependent
GO:0006355	23493	hsa-miR-638	HEY2	biological_process	regulation of transcription, DNA-dependent
GO:0006355	2354	hsa-miR-638	FOSB	biological_process	regulation of transcription, DNA-dependent
GO:0006355	284459	hsa-miR-638	HKR1	biological_process	regulation of transcription, DNA-dependent
GO:0006355	3131	hsa-miR-638	HLF	biological_process	regulation of transcription, DNA-dependent
GO:0006355	3159	hsa-miR-638	HMGA1	biological_process	regulation of transcription, DNA-dependent
GO:0006355	339488	hsa-miR-638	TFAP2E	biological_process	regulation of transcription, DNA-dependent
GO:0006355	342892	hsa-miR-638	ZNF850P	biological_process	regulation of transcription, DNA-dependent
GO:0006355	4208	hsa-miR-638	MEF2C	biological_process	regulation of transcription, DNA-dependent
GO:0006355	4212	hsa-miR-638	MEIS2	biological_process	regulation of transcription, DNA-dependent
GO:0006355	4610	hsa-miR-638	MYCL1	biological_process	regulation of transcription, DNA-dependent
GO:0006355	54626	hsa-miR-638	HES2	biological_process	regulation of transcription, DNA-dependent
GO:0006355	54738	hsa-miR-638	FEV	biological_process	regulation of transcription, DNA-dependent
GO:0006355	5626	hsa-miR-638	PROP1	biological_process	regulation of transcription, DNA-dependent
GO:0006355	57616	hsa-miR-638	TSHZ3	biological_process	regulation of transcription, DNA-dependent
GO:0006355	579	hsa-miR-638	NKX3-2	biological_process	regulation of transcription, DNA-dependent
GO:0006355	63977	hsa-miR-638	PRDM15	biological_process	regulation of transcription, DNA-dependent
GO:0006355	64344	hsa-miR-638	HIF3A	biological_process	regulation of transcription, DNA-dependent
GO:0006355	643641	hsa-miR-638	ZNF862	biological_process	regulation of transcription, DNA-dependent
GO:0006355	6657	hsa-miR-638	SOX2	biological_process	regulation of transcription, DNA-dependent
GO:0006355	7562	hsa-miR-638	ZNF708	biological_process	regulation of transcription, DNA-dependent
GO:0006355	7574	hsa-miR-638	ZNF26	biological_process	regulation of transcription, DNA-dependent
GO:0006355	7705	hsa-miR-638	ZNF146	biological_process	regulation of transcription, DNA-dependent
GO:0006355	7710	hsa-miR-638	ZNF154	biological_process	regulation of transcription, DNA-dependent
GO:0006355	7762	hsa-miR-638	ZNF215	biological_process	regulation of transcription, DNA-dependent
GO:0006355	7775	hsa-miR-638	ZNF232	biological_process	regulation of transcription, DNA-dependent
GO:0006355	79366	hsa-miR-638	HMGN5	biological_process	regulation of transcription, DNA-dependent
GO:0006355	8013	hsa-miR-638	NR4A3	biological_process	regulation of transcription, DNA-dependent
GO:0006355	8856	hsa-miR-638	NR1I2	biological_process	regulation of transcription, DNA-dependent
GO:0006355	91661	hsa-miR-638	ZNF765	biological_process	regulation of transcription, DNA-dependent
GO:0006355	9337	hsa-miR-638	CNOT8	biological_process	regulation of transcription, DNA-dependent
GO:0006355	9422	hsa-miR-638	ZNF264	biological_process	regulation of transcription, DNA-dependent
GO:0006355	9839	hsa-miR-638	ZEB2	biological_process	regulation of transcription, DNA-dependent
GO:0006355	100129842	hsa-miR-1246	ZNF737	biological_process	regulation of transcription, DNA-dependent
GO:0006355	10260	hsa-miR-1246	DENND4A	biological_process	regulation of transcription, DNA-dependent
GO:0006355	10308	hsa-miR-1246	ZNF267	biological_process	regulation of transcription, DNA-dependent
GO:0006355	10655	hsa-miR-1246	DMRT2	biological_process	regulation of transcription, DNA-dependent
GO:0006355	10780	hsa-miR-1246	ZNF234	biological_process	regulation of transcription, DNA-dependent
GO:0006355	121274	hsa-miR-1246	ZNF641	biological_process	regulation of transcription, DNA-dependent
GO:0006355	125893	hsa-miR-1246	ZNF816A	biological_process	regulation of transcription, DNA-dependent
GO:0006355	126017	hsa-miR-1246	ZNF813	biological_process	regulation of transcription, DNA-dependent
GO:0006355	128553	hsa-miR-1246	TSHZ2	biological_process	regulation of transcription, DNA-dependent
GO:0006355	131096	hsa-miR-1246	KCNH8	biological_process	regulation of transcription, DNA-dependent
GO:0006355	1389	hsa-miR-1246	CREBL2	biological_process	regulation of transcription, DNA-dependent
GO:0006355	147657	hsa-miR-1246	ZNF480	biological_process	regulation of transcription, DNA-dependent
GO:0006355	147949	hsa-miR-1246	ZNF583	biological_process	regulation of transcription, DNA-dependent
GO:0006355	148103	hsa-miR-1246	ZNF599	biological_process	regulation of transcription, DNA-dependent
GO:0006355	148206	hsa-miR-1246	ZNF714	biological_process	regulation of transcription, DNA-dependent
GO:0006355	155054	hsa-miR-1246	ZNF425	biological_process	regulation of transcription, DNA-dependent
GO:0006355	163131	hsa-miR-1246	ZNF780B	biological_process	regulation of transcription, DNA-dependent
GO:0006355	170959	hsa-miR-1246	ZNF431	biological_process	regulation of transcription, DNA-dependent
GO:0006355	1748	hsa-miR-1246	DLX4	biological_process	regulation of transcription, DNA-dependent
GO:0006355	1820	hsa-miR-1246	ARID3A	biological_process	regulation of transcription, DNA-dependent
GO:0006355	199692	hsa-miR-1246	ZNF627	biological_process	regulation of transcription, DNA-dependent
GO:0006355	2001	hsa-miR-1246	ELF5	biological_process	regulation of transcription, DNA-dependent
GO:0006355	2005	hsa-miR-1246	ELK4	biological_process	regulation of transcription, DNA-dependent
GO:0006355	2100	hsa-miR-1246	ESR2	biological_process	regulation of transcription, DNA-dependent
GO:0006355	22931	hsa-miR-1246	RAB18	biological_process	regulation of transcription, DNA-dependent
GO:0006355	2313	hsa-miR-1246	FLI1	biological_process	regulation of transcription, DNA-dependent
GO:0006355	284306	hsa-miR-1246	ZNF547	biological_process	regulation of transcription, DNA-dependent
GO:0006355	284370	hsa-miR-1246	ZNF615	biological_process	regulation of transcription, DNA-dependent
GO:0006355	286380	hsa-miR-1246	FOXD4L3	biological_process	regulation of transcription, DNA-dependent
GO:0006355	3131	hsa-miR-1246	HLF	biological_process	regulation of transcription, DNA-dependent
GO:0006355	3170	hsa-miR-1246	FOXA2	biological_process	regulation of transcription, DNA-dependent
GO:0006355	3239	hsa-miR-1246	HOXD13	biological_process	regulation of transcription, DNA-dependent
GO:0006355	340252	hsa-miR-1246	ZNF680	biological_process	regulation of transcription, DNA-dependent
GO:0006355	342357	hsa-miR-1246	ZKSCAN2	biological_process	regulation of transcription, DNA-dependent
GO:0006355	344787	hsa-miR-1246	ZNF860	biological_process	regulation of transcription, DNA-dependent
GO:0006355	374928	hsa-miR-1246	ZNF773	biological_process	regulation of transcription, DNA-dependent
GO:0006355	388558	hsa-miR-1246	ZNF808	biological_process	regulation of transcription, DNA-dependent
GO:0006355	388561	hsa-miR-1246	ZNF761	biological_process	regulation of transcription, DNA-dependent
GO:0006355	388566	hsa-miR-1246	ZNF470	biological_process	regulation of transcription, DNA-dependent
GO:0006355	4211	hsa-miR-1246	MEIS1	biological_process	regulation of transcription, DNA-dependent
GO:0006355	430	hsa-miR-1246	ASCL2	biological_process	regulation of transcription, DNA-dependent
GO:0006355	466	hsa-miR-1246	ATF1	biological_process	regulation of transcription, DNA-dependent
GO:0006355	4853	hsa-miR-1246	NOTCH2	biological_process	regulation of transcription, DNA-dependent
GO:0006355	50862	hsa-miR-1246	RNF141	biological_process	regulation of transcription, DNA-dependent
GO:0006355	5090	hsa-miR-1246	PBX3	biological_process	regulation of transcription, DNA-dependent
GO:0006355	5178	hsa-miR-1246	PEG3	biological_process	regulation of transcription, DNA-dependent
GO:0006355	51804	hsa-miR-1246	SIX4	biological_process	regulation of transcription, DNA-dependent
GO:0006355	5241	hsa-miR-1246	PGR	biological_process	regulation of transcription, DNA-dependent
GO:0006355	546	hsa-miR-1246	ATRX	biological_process	regulation of transcription, DNA-dependent
GO:0006355	5463	hsa-miR-1246	POU6F1	biological_process	regulation of transcription, DNA-dependent
GO:0006355	5465	hsa-miR-1246	PPARA	biological_process	regulation of transcription, DNA-dependent
GO:0006355	55762	hsa-miR-1246	ZNF701	biological_process	regulation of transcription, DNA-dependent
GO:0006355	55769	hsa-miR-1246	ZNF83	biological_process	regulation of transcription, DNA-dependent
GO:0006355	55888	hsa-miR-1246	ZNF167	biological_process	regulation of transcription, DNA-dependent
GO:0006355	571	hsa-miR-1246	BACH1	biological_process	regulation of transcription, DNA-dependent
GO:0006355	57343	hsa-miR-1246	ZNF304	biological_process	regulation of transcription, DNA-dependent
GO:0006355	57594	hsa-miR-1246	HOMEZ	biological_process	regulation of transcription, DNA-dependent
GO:0006355	58487	hsa-miR-1246	CREBZF	biological_process	regulation of transcription, DNA-dependent
GO:0006355	58500	hsa-miR-1246	ZNF250	biological_process	regulation of transcription, DNA-dependent
GO:0006355	5992	hsa-miR-1246	RFX4	biological_process	regulation of transcription, DNA-dependent
GO:0006355	6095	hsa-miR-1246	RORA	biological_process	regulation of transcription, DNA-dependent
GO:0006355	64288	hsa-miR-1246	ZNF323	biological_process	regulation of transcription, DNA-dependent
GO:0006355	6474	hsa-miR-1246	SHOX2	biological_process	regulation of transcription, DNA-dependent
GO:0006355	65243	hsa-miR-1246	ZNF643	biological_process	regulation of transcription, DNA-dependent
GO:0006355	653404	hsa-miR-1246	FOXD4L6	biological_process	regulation of transcription, DNA-dependent
GO:0006355	6657	hsa-miR-1246	SOX2	biological_process	regulation of transcription, DNA-dependent
GO:0006355	6688	hsa-miR-1246	SPI1	biological_process	regulation of transcription, DNA-dependent
GO:0006355	7003	hsa-miR-1246	TEAD1	biological_process	regulation of transcription, DNA-dependent
GO:0006355	7068	hsa-miR-1246	THRB	biological_process	regulation of transcription, DNA-dependent
GO:0006355	7556	hsa-miR-1246	ZNF10	biological_process	regulation of transcription, DNA-dependent
GO:0006355	7565	hsa-miR-1246	ZNF17	biological_process	regulation of transcription, DNA-dependent
GO:0006355	7567	hsa-miR-1246	ZNF19	biological_process	regulation of transcription, DNA-dependent
GO:0006355	7576	hsa-miR-1246	ZNF28	biological_process	regulation of transcription, DNA-dependent
GO:0006355	7644	hsa-miR-1246	ZNF91	biological_process	regulation of transcription, DNA-dependent
GO:0006355	7678	hsa-miR-1246	ZNF124	biological_process	regulation of transcription, DNA-dependent
GO:0006355	7694	hsa-miR-1246	ZNF135	biological_process	regulation of transcription, DNA-dependent
GO:0006355	7711	hsa-miR-1246	ZNF155	biological_process	regulation of transcription, DNA-dependent
GO:0006355	7741	hsa-miR-1246	ZNF187	biological_process	regulation of transcription, DNA-dependent
GO:0006355	7745	hsa-miR-1246	ZNF192	biological_process	regulation of transcription, DNA-dependent
GO:0006355	7770	hsa-miR-1246	ZNF227	biological_process	regulation of transcription, DNA-dependent
GO:0006355	7771	hsa-miR-1246	ZFP112	biological_process	regulation of transcription, DNA-dependent
GO:0006355	7773	hsa-miR-1246	ZNF230	biological_process	regulation of transcription, DNA-dependent
GO:0006355	79365	hsa-miR-1246	BHLHE41	biological_process	regulation of transcription, DNA-dependent
GO:0006355	79733	hsa-miR-1246	E2F8	biological_process	regulation of transcription, DNA-dependent
GO:0006355	7975	hsa-miR-1246	MAFK	biological_process	regulation of transcription, DNA-dependent
GO:0006355	80317	hsa-miR-1246	ZKSCAN3	biological_process	regulation of transcription, DNA-dependent
GO:0006355	8085	hsa-miR-1246	MLL2	biological_process	regulation of transcription, DNA-dependent
GO:0006355	81856	hsa-miR-1246	ZNF611	biological_process	regulation of transcription, DNA-dependent
GO:0006355	84525	hsa-miR-1246	HOPX	biological_process	regulation of transcription, DNA-dependent
GO:0006355	84874	hsa-miR-1246	ZNF514	biological_process	regulation of transcription, DNA-dependent
GO:0006355	84914	hsa-miR-1246	ZNF587	biological_process	regulation of transcription, DNA-dependent
GO:0006355	84924	hsa-miR-1246	ZNF566	biological_process	regulation of transcription, DNA-dependent
GO:0006355	8850	hsa-miR-1246	KAT2B	biological_process	regulation of transcription, DNA-dependent
GO:0006355	90655	hsa-miR-1246	TGIF2LY	biological_process	regulation of transcription, DNA-dependent
GO:0006355	91661	hsa-miR-1246	ZNF765	biological_process	regulation of transcription, DNA-dependent
GO:0006355	91664	hsa-miR-1246	ZNF845	biological_process	regulation of transcription, DNA-dependent
GO:0006355	9534	hsa-miR-1246	ZNF254	biological_process	regulation of transcription, DNA-dependent
GO:0006355	9603	hsa-miR-1246	NFE2L3	biological_process	regulation of transcription, DNA-dependent
GO:0006355	10481	hsa-miR-4734	HOXB13	biological_process	regulation of transcription, DNA-dependent
GO:0006355	10538	hsa-miR-4734	BATF	biological_process	regulation of transcription, DNA-dependent
GO:0006355	10736	hsa-miR-4734	SIX2	biological_process	regulation of transcription, DNA-dependent
GO:0006355	11176	hsa-miR-4734	BAZ2A	biological_process	regulation of transcription, DNA-dependent
GO:0006355	121643	hsa-miR-4734	FOXN4	biological_process	regulation of transcription, DNA-dependent
GO:0006355	199692	hsa-miR-4734	ZNF627	biological_process	regulation of transcription, DNA-dependent
GO:0006355	2298	hsa-miR-4734	FOXD4	biological_process	regulation of transcription, DNA-dependent
GO:0006355	2300	hsa-miR-4734	FOXL1	biological_process	regulation of transcription, DNA-dependent
GO:0006355	25806	hsa-miR-4734	VAX2	biological_process	regulation of transcription, DNA-dependent
GO:0006355	27287	hsa-miR-4734	VENTX	biological_process	regulation of transcription, DNA-dependent
GO:0006355	286380	hsa-miR-4734	FOXD4L3	biological_process	regulation of transcription, DNA-dependent
GO:0006355	3167	hsa-miR-4734	HMX2	biological_process	regulation of transcription, DNA-dependent
GO:0006355	3204	hsa-miR-4734	HOXA7	biological_process	regulation of transcription, DNA-dependent
GO:0006355	349334	hsa-miR-4734	FOXD4L4	biological_process	regulation of transcription, DNA-dependent
GO:0006355	4772	hsa-miR-4734	NFATC1	biological_process	regulation of transcription, DNA-dependent
GO:0006355	5087	hsa-miR-4734	PBX1	biological_process	regulation of transcription, DNA-dependent
GO:0006355	54738	hsa-miR-4734	FEV	biological_process	regulation of transcription, DNA-dependent
GO:0006355	56033	hsa-miR-4734	BARX1	biological_process	regulation of transcription, DNA-dependent
GO:0006355	57541	hsa-miR-4734	ZNF398	biological_process	regulation of transcription, DNA-dependent
GO:0006355	6257	hsa-miR-4734	RXRB	biological_process	regulation of transcription, DNA-dependent
GO:0006355	63950	hsa-miR-4734	DMRTA2	biological_process	regulation of transcription, DNA-dependent
GO:0006355	64864	hsa-miR-4734	RFX7	biological_process	regulation of transcription, DNA-dependent
GO:0006355	653404	hsa-miR-4734	FOXD4L6	biological_process	regulation of transcription, DNA-dependent
GO:0006355	653427	hsa-miR-4734	FOXD4L5	biological_process	regulation of transcription, DNA-dependent
GO:0006355	65988	hsa-miR-4734	ZNF747	biological_process	regulation of transcription, DNA-dependent
GO:0006355	6670	hsa-miR-4734	SP3	biological_process	regulation of transcription, DNA-dependent
GO:0006355	7549	hsa-miR-4734	ZNF2	biological_process	regulation of transcription, DNA-dependent
GO:0006355	7711	hsa-miR-4734	ZNF155	biological_process	regulation of transcription, DNA-dependent
GO:0006355	79175	hsa-miR-4734	ZNF343	biological_process	regulation of transcription, DNA-dependent
GO:0006355	7975	hsa-miR-4734	MAFK	biological_process	regulation of transcription, DNA-dependent
GO:0006355	79776	hsa-miR-4734	ZFHX4	biological_process	regulation of transcription, DNA-dependent
GO:0006355	8022	hsa-miR-4734	LHX3	biological_process	regulation of transcription, DNA-dependent
GO:0006355	8045	hsa-miR-4734	RASSF7	biological_process	regulation of transcription, DNA-dependent
GO:0006355	83933	hsa-miR-4734	HDAC10	biological_process	regulation of transcription, DNA-dependent
GO:0006355	84775	hsa-miR-4734	ZNF607	biological_process	regulation of transcription, DNA-dependent
GO:0006355	1029	hsa-miR-663	CDKN2A	biological_process	regulation of transcription, DNA-dependent
GO:0006355	1044	hsa-miR-663	CDX1	biological_process	regulation of transcription, DNA-dependent
GO:0006355	10498	hsa-miR-663	CARM1	biological_process	regulation of transcription, DNA-dependent
GO:0006355	10716	hsa-miR-663	TBR1	biological_process	regulation of transcription, DNA-dependent
GO:0006355	10736	hsa-miR-663	SIX2	biological_process	regulation of transcription, DNA-dependent
GO:0006355	10838	hsa-miR-663	ZNF275	biological_process	regulation of transcription, DNA-dependent
GO:0006355	11016	hsa-miR-663	ATF7	biological_process	regulation of transcription, DNA-dependent
GO:0006355	121643	hsa-miR-663	FOXN4	biological_process	regulation of transcription, DNA-dependent
GO:0006355	122953	hsa-miR-663	JDP2	biological_process	regulation of transcription, DNA-dependent
GO:0006355	1382	hsa-miR-663	CRABP2	biological_process	regulation of transcription, DNA-dependent
GO:0006355	1820	hsa-miR-663	ARID3A	biological_process	regulation of transcription, DNA-dependent
GO:0006355	2000	hsa-miR-663	ELF4	biological_process	regulation of transcription, DNA-dependent
GO:0006355	2019	hsa-miR-663	EN1	biological_process	regulation of transcription, DNA-dependent
GO:0006355	2120	hsa-miR-663	ETV6	biological_process	regulation of transcription, DNA-dependent
GO:0006355	23085	hsa-miR-663	ERC1	biological_process	regulation of transcription, DNA-dependent
GO:0006355	23440	hsa-miR-663	OTP	biological_process	regulation of transcription, DNA-dependent
GO:0006355	2354	hsa-miR-663	FOSB	biological_process	regulation of transcription, DNA-dependent
GO:0006355	26508	hsa-miR-663	HEYL	biological_process	regulation of transcription, DNA-dependent
GO:0006355	27254	hsa-miR-663	CSDC2	biological_process	regulation of transcription, DNA-dependent
GO:0006355	2972	hsa-miR-663	BRF1	biological_process	regulation of transcription, DNA-dependent
GO:0006355	29956	hsa-miR-663	LASS2	biological_process	regulation of transcription, DNA-dependent
GO:0006355	30009	hsa-miR-663	TBX21	biological_process	regulation of transcription, DNA-dependent
GO:0006355	3159	hsa-miR-663	HMGA1	biological_process	regulation of transcription, DNA-dependent
GO:0006355	3172	hsa-miR-663	HNF4A	biological_process	regulation of transcription, DNA-dependent
GO:0006355	3196	hsa-miR-663	TLX2	biological_process	regulation of transcription, DNA-dependent
GO:0006355	3218	hsa-miR-663	HOXB8	biological_process	regulation of transcription, DNA-dependent
GO:0006355	3226	hsa-miR-663	HOXC10	biological_process	regulation of transcription, DNA-dependent
GO:0006355	3227	hsa-miR-663	HOXC11	biological_process	regulation of transcription, DNA-dependent
GO:0006355	333929	hsa-miR-663	SNAI3	biological_process	regulation of transcription, DNA-dependent
GO:0006355	338917	hsa-miR-663	VSX2	biological_process	regulation of transcription, DNA-dependent
GO:0006355	3662	hsa-miR-663	IRF4	biological_process	regulation of transcription, DNA-dependent
GO:0006355	388569	hsa-miR-663	ZNF324B	biological_process	regulation of transcription, DNA-dependent
GO:0006355	399823	hsa-miR-663	FOXI2	biological_process	regulation of transcription, DNA-dependent
GO:0006355	4010	hsa-miR-663	LMX1B	biological_process	regulation of transcription, DNA-dependent
GO:0006355	4302	hsa-miR-663	MLLT6	biological_process	regulation of transcription, DNA-dependent
GO:0006355	4335	hsa-miR-663	MNT	biological_process	regulation of transcription, DNA-dependent
GO:0006355	4774	hsa-miR-663	NFIA	biological_process	regulation of transcription, DNA-dependent
GO:0006355	4782	hsa-miR-663	NFIC	biological_process	regulation of transcription, DNA-dependent
GO:0006355	4784	hsa-miR-663	NFIX	biological_process	regulation of transcription, DNA-dependent
GO:0006355	5087	hsa-miR-663	PBX1	biological_process	regulation of transcription, DNA-dependent
GO:0006355	51684	hsa-miR-663	SUFU	biological_process	regulation of transcription, DNA-dependent
GO:0006355	5307	hsa-miR-663	PITX1	biological_process	regulation of transcription, DNA-dependent
GO:0006355	5452	hsa-miR-663	POU2F2	biological_process	regulation of transcription, DNA-dependent
GO:0006355	5453	hsa-miR-663	POU3F1	biological_process	regulation of transcription, DNA-dependent
GO:0006355	54626	hsa-miR-663	HES2	biological_process	regulation of transcription, DNA-dependent
GO:0006355	55422	hsa-miR-663	ZNF331	biological_process	regulation of transcription, DNA-dependent
GO:0006355	55806	hsa-miR-663	HR	biological_process	regulation of transcription, DNA-dependent
GO:0006355	5626	hsa-miR-663	PROP1	biological_process	regulation of transcription, DNA-dependent
GO:0006355	56731	hsa-miR-663	SLC2A4RG	biological_process	regulation of transcription, DNA-dependent
GO:0006355	56751	hsa-miR-663	BARHL1	biological_process	regulation of transcription, DNA-dependent
GO:0006355	57474	hsa-miR-663	ZNF490	biological_process	regulation of transcription, DNA-dependent
GO:0006355	579	hsa-miR-663	NKX3-2	biological_process	regulation of transcription, DNA-dependent
GO:0006355	5989	hsa-miR-663	RFX1	biological_process	regulation of transcription, DNA-dependent
GO:0006355	5990	hsa-miR-663	RFX2	biological_process	regulation of transcription, DNA-dependent
GO:0006355	63977	hsa-miR-663	PRDM15	biological_process	regulation of transcription, DNA-dependent
GO:0006355	6473	hsa-miR-663	SHOX	biological_process	regulation of transcription, DNA-dependent
GO:0006355	64843	hsa-miR-663	ISL2	biological_process	regulation of transcription, DNA-dependent
GO:0006355	6493	hsa-miR-663	SIM2	biological_process	regulation of transcription, DNA-dependent
GO:0006355	6656	hsa-miR-663	SOX1	biological_process	regulation of transcription, DNA-dependent
GO:0006355	6688	hsa-miR-663	SPI1	biological_process	regulation of transcription, DNA-dependent
GO:0006355	6913	hsa-miR-663	TBX15	biological_process	regulation of transcription, DNA-dependent
GO:0006355	7621	hsa-miR-663	ZNF70	biological_process	regulation of transcription, DNA-dependent
GO:0006355	79603	hsa-miR-663	LASS4	biological_process	regulation of transcription, DNA-dependent
GO:0006355	79727	hsa-miR-663	LIN28	biological_process	regulation of transcription, DNA-dependent
GO:0006355	79891	hsa-miR-663	ZNF671	biological_process	regulation of transcription, DNA-dependent
GO:0006355	811	hsa-miR-663	CALR	biological_process	regulation of transcription, DNA-dependent
GO:0006355	83482	hsa-miR-663	SCRT1	biological_process	regulation of transcription, DNA-dependent
GO:0006355	83933	hsa-miR-663	HDAC10	biological_process	regulation of transcription, DNA-dependent
GO:0006355	84699	hsa-miR-663	CREB3L3	biological_process	regulation of transcription, DNA-dependent
GO:0006355	84839	hsa-miR-663	RAX2	biological_process	regulation of transcription, DNA-dependent
GO:0006355	85446	hsa-miR-663	ZFHX2	biological_process	regulation of transcription, DNA-dependent
GO:0006355	863	hsa-miR-663	CBFA2T3	biological_process	regulation of transcription, DNA-dependent
GO:0006355	89887	hsa-miR-663	ZNF628	biological_process	regulation of transcription, DNA-dependent
GO:0006355	9112	hsa-miR-663	MTA1	biological_process	regulation of transcription, DNA-dependent
GO:0006355	92285	hsa-miR-663	ZNF585B	biological_process	regulation of transcription, DNA-dependent
GO:0006355	9464	hsa-miR-663	HAND2	biological_process	regulation of transcription, DNA-dependent
GO:0006355	1052	hsa-miR-3178	CEBPD	biological_process	regulation of transcription, DNA-dependent
GO:0006355	125919	hsa-miR-3178	ZNF543	biological_process	regulation of transcription, DNA-dependent
GO:0006355	1390	hsa-miR-3178	CREM	biological_process	regulation of transcription, DNA-dependent
GO:0006355	1406	hsa-miR-3178	CRX	biological_process	regulation of transcription, DNA-dependent
GO:0006355	161253	hsa-miR-3178	REM2	biological_process	regulation of transcription, DNA-dependent
GO:0006355	170302	hsa-miR-3178	ARX	biological_process	regulation of transcription, DNA-dependent
GO:0006355	2019	hsa-miR-3178	EN1	biological_process	regulation of transcription, DNA-dependent
GO:0006355	2297	hsa-miR-3178	FOXD1	biological_process	regulation of transcription, DNA-dependent
GO:0006355	23440	hsa-miR-3178	OTP	biological_process	regulation of transcription, DNA-dependent
GO:0006355	23589	hsa-miR-3178	CARHSP1	biological_process	regulation of transcription, DNA-dependent
GO:0006355	26257	hsa-miR-3178	NKX2-8	biological_process	regulation of transcription, DNA-dependent
GO:0006355	27022	hsa-miR-3178	FOXD3	biological_process	regulation of transcription, DNA-dependent
GO:0006355	3195	hsa-miR-3178	TLX1	biological_process	regulation of transcription, DNA-dependent
GO:0006355	3216	hsa-miR-3178	HOXB6	biological_process	regulation of transcription, DNA-dependent
GO:0006355	3232	hsa-miR-3178	HOXD3	biological_process	regulation of transcription, DNA-dependent
GO:0006355	342357	hsa-miR-3178	ZKSCAN2	biological_process	regulation of transcription, DNA-dependent
GO:0006355	3725	hsa-miR-3178	JUN	biological_process	regulation of transcription, DNA-dependent
GO:0006355	390927	hsa-miR-3178	ZNF793	biological_process	regulation of transcription, DNA-dependent
GO:0006355	4782	hsa-miR-3178	NFIC	biological_process	regulation of transcription, DNA-dependent
GO:0006355	5307	hsa-miR-3178	PITX1	biological_process	regulation of transcription, DNA-dependent
GO:0006355	5309	hsa-miR-3178	PITX3	biological_process	regulation of transcription, DNA-dependent
GO:0006355	5453	hsa-miR-3178	POU3F1	biological_process	regulation of transcription, DNA-dependent
GO:0006355	6473	hsa-miR-3178	SHOX	biological_process	regulation of transcription, DNA-dependent
GO:0006355	6474	hsa-miR-3178	SHOX2	biological_process	regulation of transcription, DNA-dependent
GO:0006355	6656	hsa-miR-3178	SOX1	biological_process	regulation of transcription, DNA-dependent
GO:0006355	7555	hsa-miR-3178	CNBP	biological_process	regulation of transcription, DNA-dependent
GO:0006355	7594	hsa-miR-3178	ZNF43	biological_process	regulation of transcription, DNA-dependent
GO:0006355	7755	hsa-miR-3178	ZNF205	biological_process	regulation of transcription, DNA-dependent
GO:0006355	79923	hsa-miR-3178	NANOG	biological_process	regulation of transcription, DNA-dependent
GO:0006355	83933	hsa-miR-3178	HDAC10	biological_process	regulation of transcription, DNA-dependent
GO:0006355	8427	hsa-miR-3178	ZNF282	biological_process	regulation of transcription, DNA-dependent
GO:0006355	84891	hsa-miR-3178	ZSCAN10	biological_process	regulation of transcription, DNA-dependent
GO:0006355	863	hsa-miR-3178	CBFA2T3	biological_process	regulation of transcription, DNA-dependent
GO:0006355	9705	hsa-miR-3178	ST18	biological_process	regulation of transcription, DNA-dependent
GO:0006355	100129842	hsa-miR-21	ZNF737	biological_process	regulation of transcription, DNA-dependent
GO:0006355	10499	hsa-miR-21	NCOA2	biological_process	regulation of transcription, DNA-dependent
GO:0006355	10520	hsa-miR-21	ZNF211	biological_process	regulation of transcription, DNA-dependent
GO:0006355	11016	hsa-miR-21	ATF7	biological_process	regulation of transcription, DNA-dependent
GO:0006355	1316	hsa-miR-21	KLF6	biological_process	regulation of transcription, DNA-dependent
GO:0006355	153222	hsa-miR-21	C5orf41	biological_process	regulation of transcription, DNA-dependent
GO:0006355	158399	hsa-miR-21	ZNF483	biological_process	regulation of transcription, DNA-dependent
GO:0006355	162239	hsa-miR-21	ZFP1	biological_process	regulation of transcription, DNA-dependent
GO:0006355	162655	hsa-miR-21	ZNF519	biological_process	regulation of transcription, DNA-dependent
GO:0006355	163051	hsa-miR-21	ZNF709	biological_process	regulation of transcription, DNA-dependent
GO:0006355	163227	hsa-miR-21	ZNF100	biological_process	regulation of transcription, DNA-dependent
GO:0006355	170959	hsa-miR-21	ZNF431	biological_process	regulation of transcription, DNA-dependent
GO:0006355	1746	hsa-miR-21	DLX2	biological_process	regulation of transcription, DNA-dependent
GO:0006355	203523	hsa-miR-21	ZNF449	biological_process	regulation of transcription, DNA-dependent
GO:0006355	2115	hsa-miR-21	ETV1	biological_process	regulation of transcription, DNA-dependent
GO:0006355	2308	hsa-miR-21	FOXO1	biological_process	regulation of transcription, DNA-dependent
GO:0006355	2309	hsa-miR-21	FOXO3	biological_process	regulation of transcription, DNA-dependent
GO:0006355	23394	hsa-miR-21	ADNP	biological_process	regulation of transcription, DNA-dependent
GO:0006355	25937	hsa-miR-21	WWTR1	biological_process	regulation of transcription, DNA-dependent
GO:0006355	2908	hsa-miR-21	NR3C1	biological_process	regulation of transcription, DNA-dependent
GO:0006355	3344	hsa-miR-21	FOXN2	biological_process	regulation of transcription, DNA-dependent
GO:0006355	340252	hsa-miR-21	ZNF680	biological_process	regulation of transcription, DNA-dependent
GO:0006355	353274	hsa-miR-21	ZNF445	biological_process	regulation of transcription, DNA-dependent
GO:0006355	374900	hsa-miR-21	ZNF568	biological_process	regulation of transcription, DNA-dependent
GO:0006355	390980	hsa-miR-21	ZNF805	biological_process	regulation of transcription, DNA-dependent
GO:0006355	4092	hsa-miR-21	SMAD7	biological_process	regulation of transcription, DNA-dependent
GO:0006355	4208	hsa-miR-21	MEF2C	biological_process	regulation of transcription, DNA-dependent
GO:0006355	4211	hsa-miR-21	MEIS1	biological_process	regulation of transcription, DNA-dependent
GO:0006355	440077	hsa-miR-21	ZNF705A	biological_process	regulation of transcription, DNA-dependent
GO:0006355	4610	hsa-miR-21	MYCL1	biological_process	regulation of transcription, DNA-dependent
GO:0006355	4774	hsa-miR-21	NFIA	biological_process	regulation of transcription, DNA-dependent
GO:0006355	4781	hsa-miR-21	NFIB	biological_process	regulation of transcription, DNA-dependent
GO:0006355	4901	hsa-miR-21	NRL	biological_process	regulation of transcription, DNA-dependent
GO:0006355	51270	hsa-miR-21	TFDP3	biological_process	regulation of transcription, DNA-dependent
GO:0006355	5308	hsa-miR-21	PITX2	biological_process	regulation of transcription, DNA-dependent
GO:0006355	5396	hsa-miR-21	PRRX1	biological_process	regulation of transcription, DNA-dependent
GO:0006355	5465	hsa-miR-21	PPARA	biological_process	regulation of transcription, DNA-dependent
GO:0006355	55553	hsa-miR-21	SOX6	biological_process	regulation of transcription, DNA-dependent
GO:0006355	56731	hsa-miR-21	SLC2A4RG	biological_process	regulation of transcription, DNA-dependent
GO:0006355	57459	hsa-miR-21	GATAD2B	biological_process	regulation of transcription, DNA-dependent
GO:0006355	57573	hsa-miR-21	ZNF471	biological_process	regulation of transcription, DNA-dependent
GO:0006355	5991	hsa-miR-21	RFX3	biological_process	regulation of transcription, DNA-dependent
GO:0006355	6304	hsa-miR-21	SATB1	biological_process	regulation of transcription, DNA-dependent
GO:0006355	6399	hsa-miR-21	TRAPPC2	biological_process	regulation of transcription, DNA-dependent
GO:0006355	6657	hsa-miR-21	SOX2	biological_process	regulation of transcription, DNA-dependent
GO:0006355	6670	hsa-miR-21	SP3	biological_process	regulation of transcription, DNA-dependent
GO:0006355	6872	hsa-miR-21	TAF1	biological_process	regulation of transcription, DNA-dependent
GO:0006355	688	hsa-miR-21	KLF5	biological_process	regulation of transcription, DNA-dependent
GO:0006355	7068	hsa-miR-21	THRB	biological_process	regulation of transcription, DNA-dependent
GO:0006355	7181	hsa-miR-21	NR2C1	biological_process	regulation of transcription, DNA-dependent
GO:0006355	728957	hsa-miR-21	ZNF705D	biological_process	regulation of transcription, DNA-dependent
GO:0006355	730051	hsa-miR-21	ZNF814	biological_process	regulation of transcription, DNA-dependent
GO:0006355	7555	hsa-miR-21	CNBP	biological_process	regulation of transcription, DNA-dependent
GO:0006355	7556	hsa-miR-21	ZNF10	biological_process	regulation of transcription, DNA-dependent
GO:0006355	7562	hsa-miR-21	ZNF708	biological_process	regulation of transcription, DNA-dependent
GO:0006355	7568	hsa-miR-21	ZNF20	biological_process	regulation of transcription, DNA-dependent
GO:0006355	7584	hsa-miR-21	ZNF35	biological_process	regulation of transcription, DNA-dependent
GO:0006355	7743	hsa-miR-21	ZNF189	biological_process	regulation of transcription, DNA-dependent
GO:0006355	7757	hsa-miR-21	ZNF208	biological_process	regulation of transcription, DNA-dependent
GO:0006355	8092	hsa-miR-21	ALX1	biological_process	regulation of transcription, DNA-dependent
GO:0006355	84503	hsa-miR-21	ZNF527	biological_process	regulation of transcription, DNA-dependent
GO:0006355	84924	hsa-miR-21	ZNF566	biological_process	regulation of transcription, DNA-dependent
GO:0006355	8538	hsa-miR-21	BARX2	biological_process	regulation of transcription, DNA-dependent
GO:0006355	8622	hsa-miR-21	PDE8B	biological_process	regulation of transcription, DNA-dependent
GO:0006355	8864	hsa-miR-21	PER2	biological_process	regulation of transcription, DNA-dependent
GO:0006355	91975	hsa-miR-21	ZNF300	biological_process	regulation of transcription, DNA-dependent
GO:0006355	92283	hsa-miR-21	ZNF461	biological_process	regulation of transcription, DNA-dependent
GO:0006355	9337	hsa-miR-21	CNOT8	biological_process	regulation of transcription, DNA-dependent
GO:0006355	10002	hsa-miR-4492	NR2E3	biological_process	regulation of transcription, DNA-dependent
GO:0006355	100125288	hsa-miR-4492	ZGLP1	biological_process	regulation of transcription, DNA-dependent
GO:0006355	100129842	hsa-miR-4492	ZNF737	biological_process	regulation of transcription, DNA-dependent
GO:0006355	100271849	hsa-miR-4492	MEF2B	biological_process	regulation of transcription, DNA-dependent
GO:0006355	10113	hsa-miR-4492	PREB	biological_process	regulation of transcription, DNA-dependent
GO:0006355	10215	hsa-miR-4492	OLIG2	biological_process	regulation of transcription, DNA-dependent
GO:0006355	10362	hsa-miR-4492	HMG20B	biological_process	regulation of transcription, DNA-dependent
GO:0006355	10655	hsa-miR-4492	DMRT2	biological_process	regulation of transcription, DNA-dependent
GO:0006355	10838	hsa-miR-4492	ZNF275	biological_process	regulation of transcription, DNA-dependent
GO:0006355	11016	hsa-miR-4492	ATF7	biological_process	regulation of transcription, DNA-dependent
GO:0006355	11023	hsa-miR-4492	VAX1	biological_process	regulation of transcription, DNA-dependent
GO:0006355	11143	hsa-miR-4492	MYST2	biological_process	regulation of transcription, DNA-dependent
GO:0006355	11178	hsa-miR-4492	LZTS1	biological_process	regulation of transcription, DNA-dependent
GO:0006355	116113	hsa-miR-4492	FOXP4	biological_process	regulation of transcription, DNA-dependent
GO:0006355	122953	hsa-miR-4492	JDP2	biological_process	regulation of transcription, DNA-dependent
GO:0006355	135	hsa-miR-4492	ADORA2A	biological_process	regulation of transcription, DNA-dependent
GO:0006355	1382	hsa-miR-4492	CRABP2	biological_process	regulation of transcription, DNA-dependent
GO:0006355	1387	hsa-miR-4492	CREBBP	biological_process	regulation of transcription, DNA-dependent
GO:0006355	139324	hsa-miR-4492	HDX	biological_process	regulation of transcription, DNA-dependent
GO:0006355	140628	hsa-miR-4492	GATA5	biological_process	regulation of transcription, DNA-dependent
GO:0006355	146198	hsa-miR-4492	ZFP90	biological_process	regulation of transcription, DNA-dependent
GO:0006355	147686	hsa-miR-4492	ZNF418	biological_process	regulation of transcription, DNA-dependent
GO:0006355	147694	hsa-miR-4492	ZNF548	biological_process	regulation of transcription, DNA-dependent
GO:0006355	147912	hsa-miR-4492	SIX5	biological_process	regulation of transcription, DNA-dependent
GO:0006355	153222	hsa-miR-4492	C5orf41	biological_process	regulation of transcription, DNA-dependent
GO:0006355	153572	hsa-miR-4492	IRX2	biological_process	regulation of transcription, DNA-dependent
GO:0006355	1870	hsa-miR-4492	E2F2	biological_process	regulation of transcription, DNA-dependent
GO:0006355	1874	hsa-miR-4492	E2F4	biological_process	regulation of transcription, DNA-dependent
GO:0006355	1876	hsa-miR-4492	E2F6	biological_process	regulation of transcription, DNA-dependent
GO:0006355	199777	hsa-miR-4492	ZNF626	biological_process	regulation of transcription, DNA-dependent
GO:0006355	2001	hsa-miR-4492	ELF5	biological_process	regulation of transcription, DNA-dependent
GO:0006355	2002	hsa-miR-4492	ELK1	biological_process	regulation of transcription, DNA-dependent
GO:0006355	2016	hsa-miR-4492	EMX1	biological_process	regulation of transcription, DNA-dependent
GO:0006355	2078	hsa-miR-4492	ERG	biological_process	regulation of transcription, DNA-dependent
GO:0006355	2101	hsa-miR-4492	ESRRA	biological_process	regulation of transcription, DNA-dependent
GO:0006355	2117	hsa-miR-4492	ETV3	biological_process	regulation of transcription, DNA-dependent
GO:0006355	221785	hsa-miR-4492	ZNF498	biological_process	regulation of transcription, DNA-dependent
GO:0006355	221937	hsa-miR-4492	FOXK1	biological_process	regulation of transcription, DNA-dependent
GO:0006355	22887	hsa-miR-4492	FOXJ3	biological_process	regulation of transcription, DNA-dependent
GO:0006355	2302	hsa-miR-4492	FOXJ1	biological_process	regulation of transcription, DNA-dependent
GO:0006355	2307	hsa-miR-4492	FOXS1	biological_process	regulation of transcription, DNA-dependent
GO:0006355	2308	hsa-miR-4492	FOXO1	biological_process	regulation of transcription, DNA-dependent
GO:0006355	23085	hsa-miR-4492	ERC1	biological_process	regulation of transcription, DNA-dependent
GO:0006355	23462	hsa-miR-4492	HEY1	biological_process	regulation of transcription, DNA-dependent
GO:0006355	253639	hsa-miR-4492	ZNF620	biological_process	regulation of transcription, DNA-dependent
GO:0006355	257	hsa-miR-4492	ALX3	biological_process	regulation of transcription, DNA-dependent
GO:0006355	27133	hsa-miR-4492	KCNH5	biological_process	regulation of transcription, DNA-dependent
GO:0006355	27153	hsa-miR-4492	ZNF777	biological_process	regulation of transcription, DNA-dependent
GO:0006355	283078	hsa-miR-4492	MKX	biological_process	regulation of transcription, DNA-dependent
GO:0006355	284309	hsa-miR-4492	ZNF776	biological_process	regulation of transcription, DNA-dependent
GO:0006355	2972	hsa-miR-4492	BRF1	biological_process	regulation of transcription, DNA-dependent
GO:0006355	3172	hsa-miR-4492	HNF4A	biological_process	regulation of transcription, DNA-dependent
GO:0006355	3195	hsa-miR-4492	TLX1	biological_process	regulation of transcription, DNA-dependent
GO:0006355	3204	hsa-miR-4492	HOXA7	biological_process	regulation of transcription, DNA-dependent
GO:0006355	3207	hsa-miR-4492	HOXA11	biological_process	regulation of transcription, DNA-dependent
GO:0006355	3209	hsa-miR-4492	HOXA13	biological_process	regulation of transcription, DNA-dependent
GO:0006355	3211	hsa-miR-4492	HOXB1	biological_process	regulation of transcription, DNA-dependent
GO:0006355	3217	hsa-miR-4492	HOXB7	biological_process	regulation of transcription, DNA-dependent
GO:0006355	3225	hsa-miR-4492	HOXC9	biological_process	regulation of transcription, DNA-dependent
GO:0006355	3231	hsa-miR-4492	HOXD1	biological_process	regulation of transcription, DNA-dependent
GO:0006355	3237	hsa-miR-4492	HOXD11	biological_process	regulation of transcription, DNA-dependent
GO:0006355	347344	hsa-miR-4492	ZNF81	biological_process	regulation of transcription, DNA-dependent
GO:0006355	353274	hsa-miR-4492	ZNF445	biological_process	regulation of transcription, DNA-dependent
GO:0006355	3660	hsa-miR-4492	IRF2	biological_process	regulation of transcription, DNA-dependent
GO:0006355	3662	hsa-miR-4492	IRF4	biological_process	regulation of transcription, DNA-dependent
GO:0006355	3663	hsa-miR-4492	IRF5	biological_process	regulation of transcription, DNA-dependent
GO:0006355	3757	hsa-miR-4492	KCNH2	biological_process	regulation of transcription, DNA-dependent
GO:0006355	388566	hsa-miR-4492	ZNF470	biological_process	regulation of transcription, DNA-dependent
GO:0006355	389114	hsa-miR-4492	ZNF662	biological_process	regulation of transcription, DNA-dependent
GO:0006355	4010	hsa-miR-4492	LMX1B	biological_process	regulation of transcription, DNA-dependent
GO:0006355	4090	hsa-miR-4492	SMAD5	biological_process	regulation of transcription, DNA-dependent
GO:0006355	4097	hsa-miR-4492	MAFG	biological_process	regulation of transcription, DNA-dependent
GO:0006355	4302	hsa-miR-4492	MLLT6	biological_process	regulation of transcription, DNA-dependent
GO:0006355	4335	hsa-miR-4492	MNT	biological_process	regulation of transcription, DNA-dependent
GO:0006355	4488	hsa-miR-4492	MSX2	biological_process	regulation of transcription, DNA-dependent
GO:0006355	4610	hsa-miR-4492	MYCL1	biological_process	regulation of transcription, DNA-dependent
GO:0006355	4661	hsa-miR-4492	MYT1	biological_process	regulation of transcription, DNA-dependent
GO:0006355	467	hsa-miR-4492	ATF3	biological_process	regulation of transcription, DNA-dependent
GO:0006355	4772	hsa-miR-4492	NFATC1	biological_process	regulation of transcription, DNA-dependent
GO:0006355	4776	hsa-miR-4492	NFATC4	biological_process	regulation of transcription, DNA-dependent
GO:0006355	4782	hsa-miR-4492	NFIC	biological_process	regulation of transcription, DNA-dependent
GO:0006355	4784	hsa-miR-4492	NFIX	biological_process	regulation of transcription, DNA-dependent
GO:0006355	4791	hsa-miR-4492	NFKB2	biological_process	regulation of transcription, DNA-dependent
GO:0006355	4799	hsa-miR-4492	NFX1	biological_process	regulation of transcription, DNA-dependent
GO:0006355	4901	hsa-miR-4492	NRL	biological_process	regulation of transcription, DNA-dependent
GO:0006355	5077	hsa-miR-4492	PAX3	biological_process	regulation of transcription, DNA-dependent
GO:0006355	5079	hsa-miR-4492	PAX5	biological_process	regulation of transcription, DNA-dependent
GO:0006355	5081	hsa-miR-4492	PAX7	biological_process	regulation of transcription, DNA-dependent
GO:0006355	51385	hsa-miR-4492	ZNF589	biological_process	regulation of transcription, DNA-dependent
GO:0006355	51513	hsa-miR-4492	ETV7	biological_process	regulation of transcription, DNA-dependent
GO:0006355	51684	hsa-miR-4492	SUFU	biological_process	regulation of transcription, DNA-dependent
GO:0006355	51804	hsa-miR-4492	SIX4	biological_process	regulation of transcription, DNA-dependent
GO:0006355	5187	hsa-miR-4492	PER1	biological_process	regulation of transcription, DNA-dependent
GO:0006355	5307	hsa-miR-4492	PITX1	biological_process	regulation of transcription, DNA-dependent
GO:0006355	5309	hsa-miR-4492	PITX3	biological_process	regulation of transcription, DNA-dependent
GO:0006355	5430	hsa-miR-4492	POLR2A	biological_process	regulation of transcription, DNA-dependent
GO:0006355	5452	hsa-miR-4492	POU2F2	biological_process	regulation of transcription, DNA-dependent
GO:0006355	5453	hsa-miR-4492	POU3F1	biological_process	regulation of transcription, DNA-dependent
GO:0006355	546	hsa-miR-4492	ATRX	biological_process	regulation of transcription, DNA-dependent
GO:0006355	54626	hsa-miR-4492	HES2	biological_process	regulation of transcription, DNA-dependent
GO:0006355	54811	hsa-miR-4492	ZNF562	biological_process	regulation of transcription, DNA-dependent
GO:0006355	54993	hsa-miR-4492	ZSCAN2	biological_process	regulation of transcription, DNA-dependent
GO:0006355	55689	hsa-miR-4492	YEATS2	biological_process	regulation of transcription, DNA-dependent
GO:0006355	55810	hsa-miR-4492	FOXJ2	biological_process	regulation of transcription, DNA-dependent
GO:0006355	55893	hsa-miR-4492	ZNF395	biological_process	regulation of transcription, DNA-dependent
GO:0006355	56033	hsa-miR-4492	BARX1	biological_process	regulation of transcription, DNA-dependent
GO:0006355	56242	hsa-miR-4492	ZNF253	biological_process	regulation of transcription, DNA-dependent
GO:0006355	56751	hsa-miR-4492	BARHL1	biological_process	regulation of transcription, DNA-dependent
GO:0006355	57459	hsa-miR-4492	GATAD2B	biological_process	regulation of transcription, DNA-dependent
GO:0006355	57474	hsa-miR-4492	ZNF490	biological_process	regulation of transcription, DNA-dependent
GO:0006355	57677	hsa-miR-4492	ZFP14	biological_process	regulation of transcription, DNA-dependent
GO:0006355	58500	hsa-miR-4492	ZNF250	biological_process	regulation of transcription, DNA-dependent
GO:0006355	5914	hsa-miR-4492	RARA	biological_process	regulation of transcription, DNA-dependent
GO:0006355	60436	hsa-miR-4492	TGIF2	biological_process	regulation of transcription, DNA-dependent
GO:0006355	6097	hsa-miR-4492	RORC	biological_process	regulation of transcription, DNA-dependent
GO:0006355	6239	hsa-miR-4492	RREB1	biological_process	regulation of transcription, DNA-dependent
GO:0006355	6256	hsa-miR-4492	RXRA	biological_process	regulation of transcription, DNA-dependent
GO:0006355	6257	hsa-miR-4492	RXRB	biological_process	regulation of transcription, DNA-dependent
GO:0006355	63950	hsa-miR-4492	DMRTA2	biological_process	regulation of transcription, DNA-dependent
GO:0006355	64651	hsa-miR-4492	CSRNP1	biological_process	regulation of transcription, DNA-dependent
GO:0006355	65982	hsa-miR-4492	ZSCAN18	biological_process	regulation of transcription, DNA-dependent
GO:0006355	6722	hsa-miR-4492	SRF	biological_process	regulation of transcription, DNA-dependent
GO:0006355	7003	hsa-miR-4492	TEAD1	biological_process	regulation of transcription, DNA-dependent
GO:0006355	7029	hsa-miR-4492	TFDP2	biological_process	regulation of transcription, DNA-dependent
GO:0006355	7067	hsa-miR-4492	THRA	biological_process	regulation of transcription, DNA-dependent
GO:0006355	7182	hsa-miR-4492	NR2C2	biological_process	regulation of transcription, DNA-dependent
GO:0006355	728957	hsa-miR-4492	ZNF705D	biological_process	regulation of transcription, DNA-dependent
GO:0006355	7421	hsa-miR-4492	VDR	biological_process	regulation of transcription, DNA-dependent
GO:0006355	7561	hsa-miR-4492	ZNF14	biological_process	regulation of transcription, DNA-dependent
GO:0006355	7566	hsa-miR-4492	ZNF18	biological_process	regulation of transcription, DNA-dependent
GO:0006355	7568	hsa-miR-4492	ZNF20	biological_process	regulation of transcription, DNA-dependent
GO:0006355	7625	hsa-miR-4492	ZNF74	biological_process	regulation of transcription, DNA-dependent
GO:0006355	7633	hsa-miR-4492	ZNF79	biological_process	regulation of transcription, DNA-dependent
GO:0006355	7691	hsa-miR-4492	ZNF132	biological_process	regulation of transcription, DNA-dependent
GO:0006355	7695	hsa-miR-4492	ZNF136	biological_process	regulation of transcription, DNA-dependent
GO:0006355	7711	hsa-miR-4492	ZNF155	biological_process	regulation of transcription, DNA-dependent
GO:0006355	7733	hsa-miR-4492	ZNF180	biological_process	regulation of transcription, DNA-dependent
GO:0006355	7799	hsa-miR-4492	PRDM2	biological_process	regulation of transcription, DNA-dependent
GO:0006355	79603	hsa-miR-4492	LASS4	biological_process	regulation of transcription, DNA-dependent
GO:0006355	7988	hsa-miR-4492	ZNF212	biological_process	regulation of transcription, DNA-dependent
GO:0006355	79891	hsa-miR-4492	ZNF671	biological_process	regulation of transcription, DNA-dependent
GO:0006355	8022	hsa-miR-4492	LHX3	biological_process	regulation of transcription, DNA-dependent
GO:0006355	80317	hsa-miR-4492	ZKSCAN3	biological_process	regulation of transcription, DNA-dependent
GO:0006355	8045	hsa-miR-4492	RASSF7	biological_process	regulation of transcription, DNA-dependent
GO:0006355	83482	hsa-miR-4492	SCRT1	biological_process	regulation of transcription, DNA-dependent
GO:0006355	84449	hsa-miR-4492	ZNF333	biological_process	regulation of transcription, DNA-dependent
GO:0006355	84667	hsa-miR-4492	HES7	biological_process	regulation of transcription, DNA-dependent
GO:0006355	84911	hsa-miR-4492	ZNF382	biological_process	regulation of transcription, DNA-dependent
GO:0006355	8521	hsa-miR-4492	GCM1	biological_process	regulation of transcription, DNA-dependent
GO:0006355	8538	hsa-miR-4492	BARX2	biological_process	regulation of transcription, DNA-dependent
GO:0006355	860	hsa-miR-4492	RUNX2	biological_process	regulation of transcription, DNA-dependent
GO:0006355	861	hsa-miR-4492	RUNX1	biological_process	regulation of transcription, DNA-dependent
GO:0006355	862	hsa-miR-4492	RUNX1T1	biological_process	regulation of transcription, DNA-dependent
GO:0006355	864	hsa-miR-4492	RUNX3	biological_process	regulation of transcription, DNA-dependent
GO:0006355	8721	hsa-miR-4492	EDF1	biological_process	regulation of transcription, DNA-dependent
GO:0006355	8863	hsa-miR-4492	PER3	biological_process	regulation of transcription, DNA-dependent
GO:0006355	8929	hsa-miR-4492	PHOX2B	biological_process	regulation of transcription, DNA-dependent
GO:0006355	90233	hsa-miR-4492	ZNF551	biological_process	regulation of transcription, DNA-dependent
GO:0006355	90993	hsa-miR-4492	CREB3L1	biological_process	regulation of transcription, DNA-dependent
GO:0006355	9112	hsa-miR-4492	MTA1	biological_process	regulation of transcription, DNA-dependent
GO:0006355	91464	hsa-miR-4492	ISX	biological_process	regulation of transcription, DNA-dependent
GO:0006355	91661	hsa-miR-4492	ZNF765	biological_process	regulation of transcription, DNA-dependent
GO:0006355	92285	hsa-miR-4492	ZNF585B	biological_process	regulation of transcription, DNA-dependent
GO:0006355	92595	hsa-miR-4492	ZNF764	biological_process	regulation of transcription, DNA-dependent
GO:0006355	93134	hsa-miR-4492	ZNF561	biological_process	regulation of transcription, DNA-dependent
GO:0006355	93986	hsa-miR-4492	FOXP2	biological_process	regulation of transcription, DNA-dependent
GO:0006355	9479	hsa-miR-4492	MAPK8IP1	biological_process	regulation of transcription, DNA-dependent
GO:0006355	9480	hsa-miR-4492	ONECUT2	biological_process	regulation of transcription, DNA-dependent
GO:0006355	9757	hsa-miR-4492	MLL4	biological_process	regulation of transcription, DNA-dependent
GO:0006355	9862	hsa-miR-4492	MED24	biological_process	regulation of transcription, DNA-dependent
GO:0006355	9915	hsa-miR-4492	ARNT2	biological_process	regulation of transcription, DNA-dependent
GO:0006355	10481	hsa-miR-3195	HOXB13	biological_process	regulation of transcription, DNA-dependent
GO:0006355	10793	hsa-miR-3195	ZNF273	biological_process	regulation of transcription, DNA-dependent
GO:0006355	23440	hsa-miR-3195	OTP	biological_process	regulation of transcription, DNA-dependent
GO:0006355	2972	hsa-miR-3195	BRF1	biological_process	regulation of transcription, DNA-dependent
GO:0006355	30012	hsa-miR-3195	TLX3	biological_process	regulation of transcription, DNA-dependent
GO:0006355	3216	hsa-miR-3195	HOXB6	biological_process	regulation of transcription, DNA-dependent
GO:0006355	3225	hsa-miR-3195	HOXC9	biological_process	regulation of transcription, DNA-dependent
GO:0006355	50805	hsa-miR-3195	IRX4	biological_process	regulation of transcription, DNA-dependent
GO:0006355	5453	hsa-miR-3195	POU3F1	biological_process	regulation of transcription, DNA-dependent
GO:0006355	579	hsa-miR-3195	NKX3-2	biological_process	regulation of transcription, DNA-dependent
GO:0006355	5989	hsa-miR-3195	RFX1	biological_process	regulation of transcription, DNA-dependent
GO:0006355	6656	hsa-miR-3195	SOX1	biological_process	regulation of transcription, DNA-dependent
GO:0006355	10002	hsa-miR-4281	NR2E3	biological_process	regulation of transcription, DNA-dependent
GO:0006355	10215	hsa-miR-4281	OLIG2	biological_process	regulation of transcription, DNA-dependent
GO:0006355	1050	hsa-miR-4281	CEBPA	biological_process	regulation of transcription, DNA-dependent
GO:0006355	10725	hsa-miR-4281	NFAT5	biological_process	regulation of transcription, DNA-dependent
GO:0006355	10795	hsa-miR-4281	ZNF268	biological_process	regulation of transcription, DNA-dependent
GO:0006355	11023	hsa-miR-4281	VAX1	biological_process	regulation of transcription, DNA-dependent
GO:0006355	11176	hsa-miR-4281	BAZ2A	biological_process	regulation of transcription, DNA-dependent
GO:0006355	122953	hsa-miR-4281	JDP2	biological_process	regulation of transcription, DNA-dependent
GO:0006355	126375	hsa-miR-4281	ZNF792	biological_process	regulation of transcription, DNA-dependent
GO:0006355	128553	hsa-miR-4281	TSHZ2	biological_process	regulation of transcription, DNA-dependent
GO:0006355	1406	hsa-miR-4281	CRX	biological_process	regulation of transcription, DNA-dependent
GO:0006355	140612	hsa-miR-4281	ZFP28	biological_process	regulation of transcription, DNA-dependent
GO:0006355	148206	hsa-miR-4281	ZNF714	biological_process	regulation of transcription, DNA-dependent
GO:0006355	1750	hsa-miR-4281	DLX6	biological_process	regulation of transcription, DNA-dependent
GO:0006355	1870	hsa-miR-4281	E2F2	biological_process	regulation of transcription, DNA-dependent
GO:0006355	1999	hsa-miR-4281	ELF3	biological_process	regulation of transcription, DNA-dependent
GO:0006355	2309	hsa-miR-4281	FOXO3	biological_process	regulation of transcription, DNA-dependent
GO:0006355	23764	hsa-miR-4281	MAFF	biological_process	regulation of transcription, DNA-dependent
GO:0006355	253782	hsa-miR-4281	LASS6	biological_process	regulation of transcription, DNA-dependent
GO:0006355	25803	hsa-miR-4281	SPDEF	biological_process	regulation of transcription, DNA-dependent
GO:0006355	26013	hsa-miR-4281	L3MBTL	biological_process	regulation of transcription, DNA-dependent
GO:0006355	27022	hsa-miR-4281	FOXD3	biological_process	regulation of transcription, DNA-dependent
GO:0006355	29956	hsa-miR-4281	LASS2	biological_process	regulation of transcription, DNA-dependent
GO:0006355	3237	hsa-miR-4281	HOXD11	biological_process	regulation of transcription, DNA-dependent
GO:0006355	3663	hsa-miR-4281	IRF5	biological_process	regulation of transcription, DNA-dependent
GO:0006355	3757	hsa-miR-4281	KCNH2	biological_process	regulation of transcription, DNA-dependent
GO:0006355	401	hsa-miR-4281	PHOX2A	biological_process	regulation of transcription, DNA-dependent
GO:0006355	4300	hsa-miR-4281	MLLT3	biological_process	regulation of transcription, DNA-dependent
GO:0006355	4335	hsa-miR-4281	MNT	biological_process	regulation of transcription, DNA-dependent
GO:0006355	4664	hsa-miR-4281	NAB1	biological_process	regulation of transcription, DNA-dependent
GO:0006355	4821	hsa-miR-4281	NKX2-2	biological_process	regulation of transcription, DNA-dependent
GO:0006355	5396	hsa-miR-4281	PRRX1	biological_process	regulation of transcription, DNA-dependent
GO:0006355	54738	hsa-miR-4281	FEV	biological_process	regulation of transcription, DNA-dependent
GO:0006355	54993	hsa-miR-4281	ZSCAN2	biological_process	regulation of transcription, DNA-dependent
GO:0006355	57343	hsa-miR-4281	ZNF304	biological_process	regulation of transcription, DNA-dependent
GO:0006355	58487	hsa-miR-4281	CREBZF	biological_process	regulation of transcription, DNA-dependent
GO:0006355	60436	hsa-miR-4281	TGIF2	biological_process	regulation of transcription, DNA-dependent
GO:0006355	6097	hsa-miR-4281	RORC	biological_process	regulation of transcription, DNA-dependent
GO:0006355	63934	hsa-miR-4281	ZNF667	biological_process	regulation of transcription, DNA-dependent
GO:0006355	64211	hsa-miR-4281	LHX5	biological_process	regulation of transcription, DNA-dependent
GO:0006355	6473	hsa-miR-4281	SHOX	biological_process	regulation of transcription, DNA-dependent
GO:0006355	6656	hsa-miR-4281	SOX1	biological_process	regulation of transcription, DNA-dependent
GO:0006355	6911	hsa-miR-4281	TBX6	biological_process	regulation of transcription, DNA-dependent
GO:0006355	728642	hsa-miR-4281	CDK11A	biological_process	regulation of transcription, DNA-dependent
GO:0006355	7289	hsa-miR-4281	TULP3	biological_process	regulation of transcription, DNA-dependent
GO:0006355	7551	hsa-miR-4281	ZNF3	biological_process	regulation of transcription, DNA-dependent
GO:0006355	7582	hsa-miR-4281	ZNF33B	biological_process	regulation of transcription, DNA-dependent
GO:0006355	7594	hsa-miR-4281	ZNF43	biological_process	regulation of transcription, DNA-dependent
GO:0006355	7694	hsa-miR-4281	ZNF135	biological_process	regulation of transcription, DNA-dependent
GO:0006355	7799	hsa-miR-4281	PRDM2	biological_process	regulation of transcription, DNA-dependent
GO:0006355	79230	hsa-miR-4281	ZNF557	biological_process	regulation of transcription, DNA-dependent
GO:0006355	79618	hsa-miR-4281	HMBOX1	biological_process	regulation of transcription, DNA-dependent
GO:0006355	80818	hsa-miR-4281	ZNF436	biological_process	regulation of transcription, DNA-dependent
GO:0006355	84307	hsa-miR-4281	ZNF397	biological_process	regulation of transcription, DNA-dependent
GO:0006355	84839	hsa-miR-4281	RAX2	biological_process	regulation of transcription, DNA-dependent
GO:0006355	860	hsa-miR-4281	RUNX2	biological_process	regulation of transcription, DNA-dependent
GO:0006355	8848	hsa-miR-4281	TSC22D1	biological_process	regulation of transcription, DNA-dependent
GO:0006355	8864	hsa-miR-4281	PER2	biological_process	regulation of transcription, DNA-dependent
GO:0006355	8994	hsa-miR-4281	LIMD1	biological_process	regulation of transcription, DNA-dependent
GO:0006355	9496	hsa-miR-4281	TBX4	biological_process	regulation of transcription, DNA-dependent
GO:0006355	9970	hsa-miR-4281	NR1I3	biological_process	regulation of transcription, DNA-dependent
GO:0006355	100101467	hsa-miR-5096	ZNF397OS	biological_process	regulation of transcription, DNA-dependent
GO:0006355	100129842	hsa-miR-5096	ZNF737	biological_process	regulation of transcription, DNA-dependent
GO:0006355	100289635	hsa-miR-5096	ZNF605	biological_process	regulation of transcription, DNA-dependent
GO:0006355	10168	hsa-miR-5096	ZNF197	biological_process	regulation of transcription, DNA-dependent
GO:0006355	10308	hsa-miR-5096	ZNF267	biological_process	regulation of transcription, DNA-dependent
GO:0006355	10780	hsa-miR-5096	ZNF234	biological_process	regulation of transcription, DNA-dependent
GO:0006355	10793	hsa-miR-5096	ZNF273	biological_process	regulation of transcription, DNA-dependent
GO:0006355	10795	hsa-miR-5096	ZNF268	biological_process	regulation of transcription, DNA-dependent
GO:0006355	11179	hsa-miR-5096	ZNF277	biological_process	regulation of transcription, DNA-dependent
GO:0006355	114026	hsa-miR-5096	ZIM3	biological_process	regulation of transcription, DNA-dependent
GO:0006355	125919	hsa-miR-5096	ZNF543	biological_process	regulation of transcription, DNA-dependent
GO:0006355	128553	hsa-miR-5096	TSHZ2	biological_process	regulation of transcription, DNA-dependent
GO:0006355	1385	hsa-miR-5096	CREB1	biological_process	regulation of transcription, DNA-dependent
GO:0006355	139324	hsa-miR-5096	HDX	biological_process	regulation of transcription, DNA-dependent
GO:0006355	1406	hsa-miR-5096	CRX	biological_process	regulation of transcription, DNA-dependent
GO:0006355	140612	hsa-miR-5096	ZFP28	biological_process	regulation of transcription, DNA-dependent
GO:0006355	146198	hsa-miR-5096	ZFP90	biological_process	regulation of transcription, DNA-dependent
GO:0006355	146540	hsa-miR-5096	ZNF785	biological_process	regulation of transcription, DNA-dependent
GO:0006355	147686	hsa-miR-5096	ZNF418	biological_process	regulation of transcription, DNA-dependent
GO:0006355	147694	hsa-miR-5096	ZNF548	biological_process	regulation of transcription, DNA-dependent
GO:0006355	147837	hsa-miR-5096	ZNF563	biological_process	regulation of transcription, DNA-dependent
GO:0006355	148206	hsa-miR-5096	ZNF714	biological_process	regulation of transcription, DNA-dependent
GO:0006355	148254	hsa-miR-5096	ZNF555	biological_process	regulation of transcription, DNA-dependent
GO:0006355	153222	hsa-miR-5096	C5orf41	biological_process	regulation of transcription, DNA-dependent
GO:0006355	158431	hsa-miR-5096	ZNF782	biological_process	regulation of transcription, DNA-dependent
GO:0006355	162239	hsa-miR-5096	ZFP1	biological_process	regulation of transcription, DNA-dependent
GO:0006355	163049	hsa-miR-5096	ZNF791	biological_process	regulation of transcription, DNA-dependent
GO:0006355	163071	hsa-miR-5096	ZNF114	biological_process	regulation of transcription, DNA-dependent
GO:0006355	169270	hsa-miR-5096	ZNF596	biological_process	regulation of transcription, DNA-dependent
GO:0006355	170959	hsa-miR-5096	ZNF431	biological_process	regulation of transcription, DNA-dependent
GO:0006355	1750	hsa-miR-5096	DLX6	biological_process	regulation of transcription, DNA-dependent
GO:0006355	1959	hsa-miR-5096	EGR2	biological_process	regulation of transcription, DNA-dependent
GO:0006355	199777	hsa-miR-5096	ZNF626	biological_process	regulation of transcription, DNA-dependent
GO:0006355	2020	hsa-miR-5096	EN2	biological_process	regulation of transcription, DNA-dependent
GO:0006355	2078	hsa-miR-5096	ERG	biological_process	regulation of transcription, DNA-dependent
GO:0006355	2115	hsa-miR-5096	ETV1	biological_process	regulation of transcription, DNA-dependent
GO:0006355	221037	hsa-miR-5096	JMJD1C	biological_process	regulation of transcription, DNA-dependent
GO:0006355	221937	hsa-miR-5096	FOXK1	biological_process	regulation of transcription, DNA-dependent
GO:0006355	222696	hsa-miR-5096	ZSCAN23	biological_process	regulation of transcription, DNA-dependent
GO:0006355	22835	hsa-miR-5096	ZFP30	biological_process	regulation of transcription, DNA-dependent
GO:0006355	2305	hsa-miR-5096	FOXM1	biological_process	regulation of transcription, DNA-dependent
GO:0006355	23394	hsa-miR-5096	ADNP	biological_process	regulation of transcription, DNA-dependent
GO:0006355	23764	hsa-miR-5096	MAFF	biological_process	regulation of transcription, DNA-dependent
GO:0006355	253639	hsa-miR-5096	ZNF620	biological_process	regulation of transcription, DNA-dependent
GO:0006355	253782	hsa-miR-5096	LASS6	biological_process	regulation of transcription, DNA-dependent
GO:0006355	256051	hsa-miR-5096	ZNF549	biological_process	regulation of transcription, DNA-dependent
GO:0006355	2625	hsa-miR-5096	GATA3	biological_process	regulation of transcription, DNA-dependent
GO:0006355	2908	hsa-miR-5096	NR3C1	biological_process	regulation of transcription, DNA-dependent
GO:0006355	3195	hsa-miR-5096	TLX1	biological_process	regulation of transcription, DNA-dependent
GO:0006355	3201	hsa-miR-5096	HOXA4	biological_process	regulation of transcription, DNA-dependent
GO:0006355	3209	hsa-miR-5096	HOXA13	biological_process	regulation of transcription, DNA-dependent
GO:0006355	339327	hsa-miR-5096	ZNF546	biological_process	regulation of transcription, DNA-dependent
GO:0006355	3394	hsa-miR-5096	IRF8	biological_process	regulation of transcription, DNA-dependent
GO:0006355	340252	hsa-miR-5096	ZNF680	biological_process	regulation of transcription, DNA-dependent
GO:0006355	340385	hsa-miR-5096	ZNF517	biological_process	regulation of transcription, DNA-dependent
GO:0006355	353274	hsa-miR-5096	ZNF445	biological_process	regulation of transcription, DNA-dependent
GO:0006355	3660	hsa-miR-5096	IRF2	biological_process	regulation of transcription, DNA-dependent
GO:0006355	3662	hsa-miR-5096	IRF4	biological_process	regulation of transcription, DNA-dependent
GO:0006355	3670	hsa-miR-5096	ISL1	biological_process	regulation of transcription, DNA-dependent
GO:0006355	374900	hsa-miR-5096	ZNF568	biological_process	regulation of transcription, DNA-dependent
GO:0006355	388566	hsa-miR-5096	ZNF470	biological_process	regulation of transcription, DNA-dependent
GO:0006355	389421	hsa-miR-5096	LIN28B	biological_process	regulation of transcription, DNA-dependent
GO:0006355	400720	hsa-miR-5096	ZNF772	biological_process	regulation of transcription, DNA-dependent
GO:0006355	4009	hsa-miR-5096	LMX1A	biological_process	regulation of transcription, DNA-dependent
GO:0006355	4093	hsa-miR-5096	SMAD9	biological_process	regulation of transcription, DNA-dependent
GO:0006355	4205	hsa-miR-5096	MEF2A	biological_process	regulation of transcription, DNA-dependent
GO:0006355	4300	hsa-miR-5096	MLLT3	biological_process	regulation of transcription, DNA-dependent
GO:0006355	431707	hsa-miR-5096	LHX8	biological_process	regulation of transcription, DNA-dependent
GO:0006355	440077	hsa-miR-5096	ZNF705A	biological_process	regulation of transcription, DNA-dependent
GO:0006355	441234	hsa-miR-5096	ZNF716	biological_process	regulation of transcription, DNA-dependent
GO:0006355	4488	hsa-miR-5096	MSX2	biological_process	regulation of transcription, DNA-dependent
GO:0006355	4772	hsa-miR-5096	NFATC1	biological_process	regulation of transcription, DNA-dependent
GO:0006355	4774	hsa-miR-5096	NFIA	biological_process	regulation of transcription, DNA-dependent
GO:0006355	4862	hsa-miR-5096	NPAS2	biological_process	regulation of transcription, DNA-dependent
GO:0006355	503582	hsa-miR-5096	ARGFX	biological_process	regulation of transcription, DNA-dependent
GO:0006355	5090	hsa-miR-5096	PBX3	biological_process	regulation of transcription, DNA-dependent
GO:0006355	50945	hsa-miR-5096	TBX22	biological_process	regulation of transcription, DNA-dependent
GO:0006355	51351	hsa-miR-5096	ZNF117	biological_process	regulation of transcription, DNA-dependent
GO:0006355	51385	hsa-miR-5096	ZNF589	biological_process	regulation of transcription, DNA-dependent
GO:0006355	51804	hsa-miR-5096	SIX4	biological_process	regulation of transcription, DNA-dependent
GO:0006355	5241	hsa-miR-5096	PGR	biological_process	regulation of transcription, DNA-dependent
GO:0006355	5452	hsa-miR-5096	POU2F2	biological_process	regulation of transcription, DNA-dependent
GO:0006355	54626	hsa-miR-5096	HES2	biological_process	regulation of transcription, DNA-dependent
GO:0006355	5463	hsa-miR-5096	POU6F1	biological_process	regulation of transcription, DNA-dependent
GO:0006355	5465	hsa-miR-5096	PPARA	biological_process	regulation of transcription, DNA-dependent
GO:0006355	54738	hsa-miR-5096	FEV	biological_process	regulation of transcription, DNA-dependent
GO:0006355	54811	hsa-miR-5096	ZNF562	biological_process	regulation of transcription, DNA-dependent
GO:0006355	54856	hsa-miR-5096	GON4L	biological_process	regulation of transcription, DNA-dependent
GO:0006355	55145	hsa-miR-5096	THAP1	biological_process	regulation of transcription, DNA-dependent
GO:0006355	55422	hsa-miR-5096	ZNF331	biological_process	regulation of transcription, DNA-dependent
GO:0006355	55689	hsa-miR-5096	YEATS2	biological_process	regulation of transcription, DNA-dependent
GO:0006355	571	hsa-miR-5096	BACH1	biological_process	regulation of transcription, DNA-dependent
GO:0006355	57109	hsa-miR-5096	REXO4	biological_process	regulation of transcription, DNA-dependent
GO:0006355	57116	hsa-miR-5096	ZNF695	biological_process	regulation of transcription, DNA-dependent
GO:0006355	57209	hsa-miR-5096	ZNF248	biological_process	regulation of transcription, DNA-dependent
GO:0006355	57336	hsa-miR-5096	ZNF287	biological_process	regulation of transcription, DNA-dependent
GO:0006355	57541	hsa-miR-5096	ZNF398	biological_process	regulation of transcription, DNA-dependent
GO:0006355	57677	hsa-miR-5096	ZFP14	biological_process	regulation of transcription, DNA-dependent
GO:0006355	57693	hsa-miR-5096	ZNF317	biological_process	regulation of transcription, DNA-dependent
GO:0006355	57786	hsa-miR-5096	RBAK	biological_process	regulation of transcription, DNA-dependent
GO:0006355	5991	hsa-miR-5096	RFX3	biological_process	regulation of transcription, DNA-dependent
GO:0006355	6095	hsa-miR-5096	RORA	biological_process	regulation of transcription, DNA-dependent
GO:0006355	6097	hsa-miR-5096	RORC	biological_process	regulation of transcription, DNA-dependent
GO:0006355	6256	hsa-miR-5096	RXRA	biological_process	regulation of transcription, DNA-dependent
GO:0006355	6304	hsa-miR-5096	SATB1	biological_process	regulation of transcription, DNA-dependent
GO:0006355	63934	hsa-miR-5096	ZNF667	biological_process	regulation of transcription, DNA-dependent
GO:0006355	63946	hsa-miR-5096	DMRTC2	biological_process	regulation of transcription, DNA-dependent
GO:0006355	63950	hsa-miR-5096	DMRTA2	biological_process	regulation of transcription, DNA-dependent
GO:0006355	641339	hsa-miR-5096	ZNF674	biological_process	regulation of transcription, DNA-dependent
GO:0006355	64864	hsa-miR-5096	RFX7	biological_process	regulation of transcription, DNA-dependent
GO:0006355	6495	hsa-miR-5096	SIX1	biological_process	regulation of transcription, DNA-dependent
GO:0006355	6656	hsa-miR-5096	SOX1	biological_process	regulation of transcription, DNA-dependent
GO:0006355	6657	hsa-miR-5096	SOX2	biological_process	regulation of transcription, DNA-dependent
GO:0006355	6670	hsa-miR-5096	SP3	biological_process	regulation of transcription, DNA-dependent
GO:0006355	6756	hsa-miR-5096	SSX1	biological_process	regulation of transcription, DNA-dependent
GO:0006355	6862	hsa-miR-5096	T	biological_process	regulation of transcription, DNA-dependent
GO:0006355	6875	hsa-miR-5096	TAF4B	biological_process	regulation of transcription, DNA-dependent
GO:0006355	730051	hsa-miR-5096	ZNF814	biological_process	regulation of transcription, DNA-dependent
GO:0006355	7335	hsa-miR-5096	UBE2V1	biological_process	regulation of transcription, DNA-dependent
GO:0006355	7428	hsa-miR-5096	VHL	biological_process	regulation of transcription, DNA-dependent
GO:0006355	7549	hsa-miR-5096	ZNF2	biological_process	regulation of transcription, DNA-dependent
GO:0006355	7561	hsa-miR-5096	ZNF14	biological_process	regulation of transcription, DNA-dependent
GO:0006355	7566	hsa-miR-5096	ZNF18	biological_process	regulation of transcription, DNA-dependent
GO:0006355	7568	hsa-miR-5096	ZNF20	biological_process	regulation of transcription, DNA-dependent
GO:0006355	7581	hsa-miR-5096	ZNF33A	biological_process	regulation of transcription, DNA-dependent
GO:0006355	7582	hsa-miR-5096	ZNF33B	biological_process	regulation of transcription, DNA-dependent
GO:0006355	7594	hsa-miR-5096	ZNF43	biological_process	regulation of transcription, DNA-dependent
GO:0006355	7626	hsa-miR-5096	ZNF75D	biological_process	regulation of transcription, DNA-dependent
GO:0006355	7637	hsa-miR-5096	ZNF84	biological_process	regulation of transcription, DNA-dependent
GO:0006355	7695	hsa-miR-5096	ZNF136	biological_process	regulation of transcription, DNA-dependent
GO:0006355	7697	hsa-miR-5096	ZNF138	biological_process	regulation of transcription, DNA-dependent
GO:0006355	7699	hsa-miR-5096	ZNF140	biological_process	regulation of transcription, DNA-dependent
GO:0006355	7705	hsa-miR-5096	ZNF146	biological_process	regulation of transcription, DNA-dependent
GO:0006355	7733	hsa-miR-5096	ZNF180	biological_process	regulation of transcription, DNA-dependent
GO:0006355	7748	hsa-miR-5096	ZNF195	biological_process	regulation of transcription, DNA-dependent
GO:0006355	7757	hsa-miR-5096	ZNF208	biological_process	regulation of transcription, DNA-dependent
GO:0006355	7760	hsa-miR-5096	ZNF213	biological_process	regulation of transcription, DNA-dependent
GO:0006355	7771	hsa-miR-5096	ZFP112	biological_process	regulation of transcription, DNA-dependent
GO:0006355	7776	hsa-miR-5096	ZNF236	biological_process	regulation of transcription, DNA-dependent
GO:0006355	7812	hsa-miR-5096	CSDE1	biological_process	regulation of transcription, DNA-dependent
GO:0006355	79088	hsa-miR-5096	ZNF426	biological_process	regulation of transcription, DNA-dependent
GO:0006355	79862	hsa-miR-5096	ZNF669	biological_process	regulation of transcription, DNA-dependent
GO:0006355	80032	hsa-miR-5096	ZNF556	biological_process	regulation of transcription, DNA-dependent
GO:0006355	80110	hsa-miR-5096	ZNF614	biological_process	regulation of transcription, DNA-dependent
GO:0006355	8013	hsa-miR-5096	NR4A3	biological_process	regulation of transcription, DNA-dependent
GO:0006355	80264	hsa-miR-5096	ZNF430	biological_process	regulation of transcription, DNA-dependent
GO:0006355	81856	hsa-miR-5096	ZNF611	biological_process	regulation of transcription, DNA-dependent
GO:0006355	8227	hsa-miR-5096	SFRS17A	biological_process	regulation of transcription, DNA-dependent
GO:0006355	84307	hsa-miR-5096	ZNF397	biological_process	regulation of transcription, DNA-dependent
GO:0006355	84449	hsa-miR-5096	ZNF333	biological_process	regulation of transcription, DNA-dependent
GO:0006355	84503	hsa-miR-5096	ZNF527	biological_process	regulation of transcription, DNA-dependent
GO:0006355	84527	hsa-miR-5096	ZNF559	biological_process	regulation of transcription, DNA-dependent
GO:0006355	84901	hsa-miR-5096	NFATC2IP	biological_process	regulation of transcription, DNA-dependent
GO:0006355	84911	hsa-miR-5096	ZNF382	biological_process	regulation of transcription, DNA-dependent
GO:0006355	8850	hsa-miR-5096	KAT2B	biological_process	regulation of transcription, DNA-dependent
GO:0006355	8864	hsa-miR-5096	PER2	biological_process	regulation of transcription, DNA-dependent
GO:0006355	8994	hsa-miR-5096	LIMD1	biological_process	regulation of transcription, DNA-dependent
GO:0006355	90233	hsa-miR-5096	ZNF551	biological_process	regulation of transcription, DNA-dependent
GO:0006355	90321	hsa-miR-5096	ZNF766	biological_process	regulation of transcription, DNA-dependent
GO:0006355	91133	hsa-miR-5096	L3MBTL4	biological_process	regulation of transcription, DNA-dependent
GO:0006355	9139	hsa-miR-5096	CBFA2T2	biological_process	regulation of transcription, DNA-dependent
GO:0006355	92283	hsa-miR-5096	ZNF461	biological_process	regulation of transcription, DNA-dependent
GO:0006355	9252	hsa-miR-5096	RPS6KA5	biological_process	regulation of transcription, DNA-dependent
GO:0006355	92595	hsa-miR-5096	ZNF764	biological_process	regulation of transcription, DNA-dependent
GO:0006355	9310	hsa-miR-5096	ZNF235	biological_process	regulation of transcription, DNA-dependent
GO:0006355	93474	hsa-miR-5096	ZNF670	biological_process	regulation of transcription, DNA-dependent
GO:0006355	9422	hsa-miR-5096	ZNF264	biological_process	regulation of transcription, DNA-dependent
GO:0006355	9534	hsa-miR-5096	ZNF254	biological_process	regulation of transcription, DNA-dependent
GO:0005886	10009	hsa-miR-638	ZBTB33	cellular_component	plasma membrane
GO:0005886	10149	hsa-miR-638	GPR64	cellular_component	plasma membrane
GO:0005886	10211	hsa-miR-638	FLOT1	cellular_component	plasma membrane
GO:0005886	1087	hsa-miR-638	CEACAM7	cellular_component	plasma membrane
GO:0005886	11045	hsa-miR-638	UPK1A	cellular_component	plasma membrane
GO:0005886	11132	hsa-miR-638	CAPN10	cellular_component	plasma membrane
GO:0005886	114836	hsa-miR-638	SLAMF6	cellular_component	plasma membrane
GO:0005886	118	hsa-miR-638	ADD1	cellular_component	plasma membrane
GO:0005886	124599	hsa-miR-638	CD300LB	cellular_component	plasma membrane
GO:0005886	131450	hsa-miR-638	CD200R1	cellular_component	plasma membrane
GO:0005886	140803	hsa-miR-638	TRPM6	cellular_component	plasma membrane
GO:0005886	153201	hsa-miR-638	SLC36A2	cellular_component	plasma membrane
GO:0005886	1604	hsa-miR-638	CD55	cellular_component	plasma membrane
GO:0005886	1734	hsa-miR-638	DIO2	cellular_component	plasma membrane
GO:0005886	177	hsa-miR-638	AGER	cellular_component	plasma membrane
GO:0005886	187	hsa-miR-638	APLNR	cellular_component	plasma membrane
GO:0005886	2015	hsa-miR-638	EMR1	cellular_component	plasma membrane
GO:0005886	2026	hsa-miR-638	ENO2	cellular_component	plasma membrane
GO:0005886	2157	hsa-miR-638	F8	cellular_component	plasma membrane
GO:0005886	2213	hsa-miR-638	FCGR2B	cellular_component	plasma membrane
GO:0005886	221395	hsa-miR-638	GPR116	cellular_component	plasma membrane
GO:0005886	2239	hsa-miR-638	GPC4	cellular_component	plasma membrane
GO:0005886	22918	hsa-miR-638	CD93	cellular_component	plasma membrane
GO:0005886	2562	hsa-miR-638	GABRB3	cellular_component	plasma membrane
GO:0005886	2566	hsa-miR-638	GABRG2	cellular_component	plasma membrane
GO:0005886	2596	hsa-miR-638	GAP43	cellular_component	plasma membrane
GO:0005886	27197	hsa-miR-638	GPR82	cellular_component	plasma membrane
GO:0005886	2830	hsa-miR-638	GPR6	cellular_component	plasma membrane
GO:0005886	286530	hsa-miR-638	P2RY8	cellular_component	plasma membrane
GO:0005886	286676	hsa-miR-638	ILDR1	cellular_component	plasma membrane
GO:0005886	2893	hsa-miR-638	GRIA4	cellular_component	plasma membrane
GO:0005886	2903	hsa-miR-638	GRIN2A	cellular_component	plasma membrane
GO:0005886	29126	hsa-miR-638	CD274	cellular_component	plasma membrane
GO:0005886	29986	hsa-miR-638	SLC39A2	cellular_component	plasma membrane
GO:0005886	30845	hsa-miR-638	EHD3	cellular_component	plasma membrane
GO:0005886	3113	hsa-miR-638	HLA-DPA1	cellular_component	plasma membrane
GO:0005886	3358	hsa-miR-638	HTR2C	cellular_component	plasma membrane
GO:0005886	3560	hsa-miR-638	IL2RB	cellular_component	plasma membrane
GO:0005886	3741	hsa-miR-638	KCNA5	cellular_component	plasma membrane
GO:0005886	3763	hsa-miR-638	KCNJ6	cellular_component	plasma membrane
GO:0005886	3782	hsa-miR-638	KCNN3	cellular_component	plasma membrane
GO:0005886	3977	hsa-miR-638	LIFR	cellular_component	plasma membrane
GO:0005886	4061	hsa-miR-638	LY6E	cellular_component	plasma membrane
GO:0005886	4158	hsa-miR-638	MC2R	cellular_component	plasma membrane
GO:0005886	43	hsa-miR-638	ACHE	cellular_component	plasma membrane
GO:0005886	4345	hsa-miR-638	CD200	cellular_component	plasma membrane
GO:0005886	4684	hsa-miR-638	NCAM1	cellular_component	plasma membrane
GO:0005886	490	hsa-miR-638	ATP2B1	cellular_component	plasma membrane
GO:0005886	50848	hsa-miR-638	F11R	cellular_component	plasma membrane
GO:0005886	51107	hsa-miR-638	APH1A	cellular_component	plasma membrane
GO:0005886	51148	hsa-miR-638	CERCAM	cellular_component	plasma membrane
GO:0005886	51208	hsa-miR-638	CLDN18	cellular_component	plasma membrane
GO:0005886	5361	hsa-miR-638	PLXNA1	cellular_component	plasma membrane
GO:0005886	53826	hsa-miR-638	FXYD6	cellular_component	plasma membrane
GO:0005886	54328	hsa-miR-638	GPR173	cellular_component	plasma membrane
GO:0005886	54510	hsa-miR-638	PCDH18	cellular_component	plasma membrane
GO:0005886	55600	hsa-miR-638	ITLN1	cellular_component	plasma membrane
GO:0005886	55630	hsa-miR-638	SLC39A4	cellular_component	plasma membrane
GO:0005886	55716	hsa-miR-638	LMBR1L	cellular_component	plasma membrane
GO:0005886	55824	hsa-miR-638	PAG1	cellular_component	plasma membrane
GO:0005886	5663	hsa-miR-638	PSEN1	cellular_component	plasma membrane
GO:0005886	56963	hsa-miR-638	RGMA	cellular_component	plasma membrane
GO:0005886	57105	hsa-miR-638	CYSLTR2	cellular_component	plasma membrane
GO:0005886	5791	hsa-miR-638	PTPRE	cellular_component	plasma membrane
GO:0005886	5865	hsa-miR-638	RAB3B	cellular_component	plasma membrane
GO:0005886	59340	hsa-miR-638	HRH4	cellular_component	plasma membrane
GO:0005886	6272	hsa-miR-638	SORT1	cellular_component	plasma membrane
GO:0005886	6334	hsa-miR-638	SCN8A	cellular_component	plasma membrane
GO:0005886	63826	hsa-miR-638	SRR	cellular_component	plasma membrane
GO:0005886	6385	hsa-miR-638	SDC4	cellular_component	plasma membrane
GO:0005886	6567	hsa-miR-638	SLC16A2	cellular_component	plasma membrane
GO:0005886	66004	hsa-miR-638	LYNX1	cellular_component	plasma membrane
GO:0005886	66008	hsa-miR-638	TRAK2	cellular_component	plasma membrane
GO:0005886	6786	hsa-miR-638	STIM1	cellular_component	plasma membrane
GO:0005886	7010	hsa-miR-638	TEK	cellular_component	plasma membrane
GO:0005886	7052	hsa-miR-638	TGM2	cellular_component	plasma membrane
GO:0005886	7133	hsa-miR-638	TNFRSF1B	cellular_component	plasma membrane
GO:0005886	7402	hsa-miR-638	UTRN	cellular_component	plasma membrane
GO:0005886	7430	hsa-miR-638	EZR	cellular_component	plasma membrane
GO:0005886	777	hsa-miR-638	CACNA1E	cellular_component	plasma membrane
GO:0005886	80329	hsa-miR-638	ULBP1	cellular_component	plasma membrane
GO:0005886	8038	hsa-miR-638	ADAM12	cellular_component	plasma membrane
GO:0005886	80380	hsa-miR-638	PDCD1LG2	cellular_component	plasma membrane
GO:0005886	81318	hsa-miR-638	OR4A5	cellular_component	plasma membrane
GO:0005886	83483	hsa-miR-638	PLVAP	cellular_component	plasma membrane
GO:0005886	83700	hsa-miR-638	JAM3	cellular_component	plasma membrane
GO:0005886	8394	hsa-miR-638	PIP5K1A	cellular_component	plasma membrane
GO:0005886	85407	hsa-miR-638	NKD1	cellular_component	plasma membrane
GO:0005886	8773	hsa-miR-638	SNAP23	cellular_component	plasma membrane
GO:0005886	9002	hsa-miR-638	F2RL3	cellular_component	plasma membrane
GO:0005886	9071	hsa-miR-638	CLDN10	cellular_component	plasma membrane
GO:0005886	920	hsa-miR-638	CD4	cellular_component	plasma membrane
GO:0005886	9223	hsa-miR-638	MAGI1	cellular_component	plasma membrane
GO:0005886	9475	hsa-miR-638	ROCK2	cellular_component	plasma membrane
GO:0005886	961	hsa-miR-638	CD47	cellular_component	plasma membrane
GO:0005886	1000	hsa-miR-1246	CDH2	cellular_component	plasma membrane
GO:0005886	1012	hsa-miR-1246	CDH13	cellular_component	plasma membrane
GO:0005886	10228	hsa-miR-1246	STX6	cellular_component	plasma membrane
GO:0005886	10486	hsa-miR-1246	CAP2	cellular_component	plasma membrane
GO:0005886	10495	hsa-miR-1246	ENOX2	cellular_component	plasma membrane
GO:0005886	10599	hsa-miR-1246	SLCO1B1	cellular_component	plasma membrane
GO:0005886	10673	hsa-miR-1246	TNFSF13B	cellular_component	plasma membrane
GO:0005886	10818	hsa-miR-1246	FRS2	cellular_component	plasma membrane
GO:0005886	10886	hsa-miR-1246	NPFFR2	cellular_component	plasma membrane
GO:0005886	11031	hsa-miR-1246	RAB31	cellular_component	plasma membrane
GO:0005886	1128	hsa-miR-1246	CHRM1	cellular_component	plasma membrane
GO:0005886	114134	hsa-miR-1246	SLC2A13	cellular_component	plasma membrane
GO:0005886	1143	hsa-miR-1246	CHRNB4	cellular_component	plasma membrane
GO:0005886	115	hsa-miR-1246	ADCY9	cellular_component	plasma membrane
GO:0005886	118429	hsa-miR-1246	ANTXR2	cellular_component	plasma membrane
GO:0005886	119	hsa-miR-1246	ADD2	cellular_component	plasma membrane
GO:0005886	122786	hsa-miR-1246	FRMD6	cellular_component	plasma membrane
GO:0005886	124935	hsa-miR-1246	SLC43A2	cellular_component	plasma membrane
GO:0005886	127124	hsa-miR-1246	ATP6V1G3	cellular_component	plasma membrane
GO:0005886	134957	hsa-miR-1246	STXBP5	cellular_component	plasma membrane
GO:0005886	135228	hsa-miR-1246	CD109	cellular_component	plasma membrane
GO:0005886	1368	hsa-miR-1246	CPM	cellular_component	plasma membrane
GO:0005886	145957	hsa-miR-1246	NRG4	cellular_component	plasma membrane
GO:0005886	148738	hsa-miR-1246	HFE2	cellular_component	plasma membrane
GO:0005886	151888	hsa-miR-1246	BTLA	cellular_component	plasma membrane
GO:0005886	153	hsa-miR-1246	ADRB1	cellular_component	plasma membrane
GO:0005886	1654	hsa-miR-1246	DDX3X	cellular_component	plasma membrane
GO:0005886	1734	hsa-miR-1246	DIO2	cellular_component	plasma membrane
GO:0005886	1821	hsa-miR-1246	DRP2	cellular_component	plasma membrane
GO:0005886	1896	hsa-miR-1246	EDA	cellular_component	plasma membrane
GO:0005886	2028	hsa-miR-1246	ENPEP	cellular_component	plasma membrane
GO:0005886	2060	hsa-miR-1246	EPS15	cellular_component	plasma membrane
GO:0005886	2152	hsa-miR-1246	F3	cellular_component	plasma membrane
GO:0005886	2153	hsa-miR-1246	F5	cellular_component	plasma membrane
GO:0005886	219790	hsa-miR-1246	RTKN2	cellular_component	plasma membrane
GO:0005886	2263	hsa-miR-1246	FGFR2	cellular_component	plasma membrane
GO:0005886	22931	hsa-miR-1246	RAB18	cellular_component	plasma membrane
GO:0005886	22941	hsa-miR-1246	SHANK2	cellular_component	plasma membrane
GO:0005886	23026	hsa-miR-1246	MYO16	cellular_component	plasma membrane
GO:0005886	23114	hsa-miR-1246	NFASC	cellular_component	plasma membrane
GO:0005886	23210	hsa-miR-1246	JMJD6	cellular_component	plasma membrane
GO:0005886	23305	hsa-miR-1246	ACSL6	cellular_component	plasma membrane
GO:0005886	23362	hsa-miR-1246	PSD3	cellular_component	plasma membrane
GO:0005886	23432	hsa-miR-1246	GPR161	cellular_component	plasma membrane
GO:0005886	23504	hsa-miR-1246	RIMBP2	cellular_component	plasma membrane
GO:0005886	23516	hsa-miR-1246	SLC39A14	cellular_component	plasma membrane
GO:0005886	23705	hsa-miR-1246	CADM1	cellular_component	plasma membrane
GO:0005886	24145	hsa-miR-1246	PANX1	cellular_component	plasma membrane
GO:0005886	2562	hsa-miR-1246	GABRB3	cellular_component	plasma membrane
GO:0005886	2566	hsa-miR-1246	GABRG2	cellular_component	plasma membrane
GO:0005886	257194	hsa-miR-1246	NEGR1	cellular_component	plasma membrane
GO:0005886	25849	hsa-miR-1246	PARM1	cellular_component	plasma membrane
GO:0005886	26051	hsa-miR-1246	PPP1R16B	cellular_component	plasma membrane
GO:0005886	26167	hsa-miR-1246	PCDHB5	cellular_component	plasma membrane
GO:0005886	2619	hsa-miR-1246	GAS1	cellular_component	plasma membrane
GO:0005886	2675	hsa-miR-1246	GFRA2	cellular_component	plasma membrane
GO:0005886	2743	hsa-miR-1246	GLRB	cellular_component	plasma membrane
GO:0005886	2775	hsa-miR-1246	GNAO1	cellular_component	plasma membrane
GO:0005886	2798	hsa-miR-1246	GNRHR	cellular_component	plasma membrane
GO:0005886	28234	hsa-miR-1246	SLCO1B3	cellular_component	plasma membrane
GO:0005886	2835	hsa-miR-1246	GPR12	cellular_component	plasma membrane
GO:0005886	2849	hsa-miR-1246	GPR26	cellular_component	plasma membrane
GO:0005886	286	hsa-miR-1246	ANK1	cellular_component	plasma membrane
GO:0005886	2869	hsa-miR-1246	GRK5	cellular_component	plasma membrane
GO:0005886	287	hsa-miR-1246	ANK2	cellular_component	plasma membrane
GO:0005886	2890	hsa-miR-1246	GRIA1	cellular_component	plasma membrane
GO:0005886	2893	hsa-miR-1246	GRIA4	cellular_component	plasma membrane
GO:0005886	2897	hsa-miR-1246	GRIK1	cellular_component	plasma membrane
GO:0005886	30845	hsa-miR-1246	EHD3	cellular_component	plasma membrane
GO:0005886	3363	hsa-miR-1246	HTR7	cellular_component	plasma membrane
GO:0005886	342035	hsa-miR-1246	GLDN	cellular_component	plasma membrane
GO:0005886	342184	hsa-miR-1246	FMN1	cellular_component	plasma membrane
GO:0005886	353376	hsa-miR-1246	TICAM2	cellular_component	plasma membrane
GO:0005886	3572	hsa-miR-1246	IL6ST	cellular_component	plasma membrane
GO:0005886	3678	hsa-miR-1246	ITGA5	cellular_component	plasma membrane
GO:0005886	3685	hsa-miR-1246	ITGAV	cellular_component	plasma membrane
GO:0005886	3690	hsa-miR-1246	ITGB3	cellular_component	plasma membrane
GO:0005886	375	hsa-miR-1246	ARF1	cellular_component	plasma membrane
GO:0005886	3790	hsa-miR-1246	KCNS3	cellular_component	plasma membrane
GO:0005886	389434	hsa-miR-1246	IYD	cellular_component	plasma membrane
GO:0005886	3920	hsa-miR-1246	LAMP2	cellular_component	plasma membrane
GO:0005886	3981	hsa-miR-1246	LIG4	cellular_component	plasma membrane
GO:0005886	399694	hsa-miR-1246	SHC4	cellular_component	plasma membrane
GO:0005886	401190	hsa-miR-1246	RGS7BP	cellular_component	plasma membrane
GO:0005886	4040	hsa-miR-1246	LRP6	cellular_component	plasma membrane
GO:0005886	4043	hsa-miR-1246	LRPAP1	cellular_component	plasma membrane
GO:0005886	4059	hsa-miR-1246	BCAM	cellular_component	plasma membrane
GO:0005886	4100	hsa-miR-1246	MAGEA1	cellular_component	plasma membrane
GO:0005886	4158	hsa-miR-1246	MC2R	cellular_component	plasma membrane
GO:0005886	4254	hsa-miR-1246	KITLG	cellular_component	plasma membrane
GO:0005886	4325	hsa-miR-1246	MMP16	cellular_component	plasma membrane
GO:0005886	4359	hsa-miR-1246	MPZ	cellular_component	plasma membrane
GO:0005886	4478	hsa-miR-1246	MSN	cellular_component	plasma membrane
GO:0005886	4756	hsa-miR-1246	NEO1	cellular_component	plasma membrane
GO:0005886	481	hsa-miR-1246	ATP1B1	cellular_component	plasma membrane
GO:0005886	4853	hsa-miR-1246	NOTCH2	cellular_component	plasma membrane
GO:0005886	4868	hsa-miR-1246	NPHS1	cellular_component	plasma membrane
GO:0005886	4887	hsa-miR-1246	NPY2R	cellular_component	plasma membrane
GO:0005886	4891	hsa-miR-1246	SLC11A2	cellular_component	plasma membrane
GO:0005886	490	hsa-miR-1246	ATP2B1	cellular_component	plasma membrane
GO:0005886	4907	hsa-miR-1246	NT5E	cellular_component	plasma membrane
GO:0005886	4978	hsa-miR-1246	OPCML	cellular_component	plasma membrane
GO:0005886	51232	hsa-miR-1246	CRIM1	cellular_component	plasma membrane
GO:0005886	51552	hsa-miR-1246	RAB14	cellular_component	plasma membrane
GO:0005886	5175	hsa-miR-1246	PECAM1	cellular_component	plasma membrane
GO:0005886	5286	hsa-miR-1246	PIK3C2A	cellular_component	plasma membrane
GO:0005886	53344	hsa-miR-1246	CHIC1	cellular_component	plasma membrane
GO:0005886	54329	hsa-miR-1246	GPR85	cellular_component	plasma membrane
GO:0005886	54407	hsa-miR-1246	SLC38A2	cellular_component	plasma membrane
GO:0005886	54625	hsa-miR-1246	PARP14	cellular_component	plasma membrane
GO:0005886	54798	hsa-miR-1246	DCHS2	cellular_component	plasma membrane
GO:0005886	54900	hsa-miR-1246	LAX1	cellular_component	plasma membrane
GO:0005886	55089	hsa-miR-1246	SLC38A4	cellular_component	plasma membrane
GO:0005886	55103	hsa-miR-1246	RALGPS2	cellular_component	plasma membrane
GO:0005886	55366	hsa-miR-1246	LGR4	cellular_component	plasma membrane
GO:0005886	55532	hsa-miR-1246	SLC30A10	cellular_component	plasma membrane
GO:0005886	5566	hsa-miR-1246	PRKACA	cellular_component	plasma membrane
GO:0005886	55686	hsa-miR-1246	MREG	cellular_component	plasma membrane
GO:0005886	55704	hsa-miR-1246	CCDC88A	cellular_component	plasma membrane
GO:0005886	55742	hsa-miR-1246	PARVA	cellular_component	plasma membrane
GO:0005886	56125	hsa-miR-1246	PCDHB11	cellular_component	plasma membrane
GO:0005886	56127	hsa-miR-1246	PCDHB9	cellular_component	plasma membrane
GO:0005886	56134	hsa-miR-1246	PCDHAC2	cellular_component	plasma membrane
GO:0005886	56135	hsa-miR-1246	PCDHAC1	cellular_component	plasma membrane
GO:0005886	56136	hsa-miR-1246	PCDHA13	cellular_component	plasma membrane
GO:0005886	56137	hsa-miR-1246	PCDHA12	cellular_component	plasma membrane
GO:0005886	56138	hsa-miR-1246	PCDHA11	cellular_component	plasma membrane
GO:0005886	56139	hsa-miR-1246	PCDHA10	cellular_component	plasma membrane
GO:0005886	56140	hsa-miR-1246	PCDHA8	cellular_component	plasma membrane
GO:0005886	56141	hsa-miR-1246	PCDHA7	cellular_component	plasma membrane
GO:0005886	56142	hsa-miR-1246	PCDHA6	cellular_component	plasma membrane
GO:0005886	56143	hsa-miR-1246	PCDHA5	cellular_component	plasma membrane
GO:0005886	56144	hsa-miR-1246	PCDHA4	cellular_component	plasma membrane
GO:0005886	56145	hsa-miR-1246	PCDHA3	cellular_component	plasma membrane
GO:0005886	56146	hsa-miR-1246	PCDHA2	cellular_component	plasma membrane
GO:0005886	56147	hsa-miR-1246	PCDHA1	cellular_component	plasma membrane
GO:0005886	5733	hsa-miR-1246	PTGER3	cellular_component	plasma membrane
GO:0005886	57381	hsa-miR-1246	RHOJ	cellular_component	plasma membrane
GO:0005886	57403	hsa-miR-1246	RAB22A	cellular_component	plasma membrane
GO:0005886	57526	hsa-miR-1246	PCDH19	cellular_component	plasma membrane
GO:0005886	57534	hsa-miR-1246	MIB1	cellular_component	plasma membrane
GO:0005886	57826	hsa-miR-1246	RAP2C	cellular_component	plasma membrane
GO:0005886	5786	hsa-miR-1246	PTPRA	cellular_component	plasma membrane
GO:0005886	5829	hsa-miR-1246	PXN	cellular_component	plasma membrane
GO:0005886	5912	hsa-miR-1246	RAP2B	cellular_component	plasma membrane
GO:0005886	59272	hsa-miR-1246	ACE2	cellular_component	plasma membrane
GO:0005886	59339	hsa-miR-1246	PLEKHA2	cellular_component	plasma membrane
GO:0005886	5962	hsa-miR-1246	RDX	cellular_component	plasma membrane
GO:0005886	6091	hsa-miR-1246	ROBO1	cellular_component	plasma membrane
GO:0005886	6323	hsa-miR-1246	SCN1A	cellular_component	plasma membrane
GO:0005886	63826	hsa-miR-1246	SRR	cellular_component	plasma membrane
GO:0005886	64065	hsa-miR-1246	PERP	cellular_component	plasma membrane
GO:0005886	64078	hsa-miR-1246	SLC28A3	cellular_component	plasma membrane
GO:0005886	6444	hsa-miR-1246	SGCD	cellular_component	plasma membrane
GO:0005886	6456	hsa-miR-1246	SH3GL2	cellular_component	plasma membrane
GO:0005886	65059	hsa-miR-1246	RAPH1	cellular_component	plasma membrane
GO:0005886	6677	hsa-miR-1246	SPAM1	cellular_component	plasma membrane
GO:0005886	6711	hsa-miR-1246	SPTBN1	cellular_component	plasma membrane
GO:0005886	685	hsa-miR-1246	BTC	cellular_component	plasma membrane
GO:0005886	7049	hsa-miR-1246	TGFBR3	cellular_component	plasma membrane
GO:0005886	7099	hsa-miR-1246	TLR4	cellular_component	plasma membrane
GO:0005886	731	hsa-miR-1246	C8A	cellular_component	plasma membrane
GO:0005886	7320	hsa-miR-1246	UBE2B	cellular_component	plasma membrane
GO:0005886	735	hsa-miR-1246	C9	cellular_component	plasma membrane
GO:0005886	7431	hsa-miR-1246	VIM	cellular_component	plasma membrane
GO:0005886	7556	hsa-miR-1246	ZNF10	cellular_component	plasma membrane
GO:0005886	768211	hsa-miR-1246	RELL1	cellular_component	plasma membrane
GO:0005886	7855	hsa-miR-1246	FZD5	cellular_component	plasma membrane
GO:0005886	79368	hsa-miR-1246	FCRL2	cellular_component	plasma membrane
GO:0005886	79674	hsa-miR-1246	VEPH1	cellular_component	plasma membrane
GO:0005886	79930	hsa-miR-1246	DOK3	cellular_component	plasma membrane
GO:0005886	80031	hsa-miR-1246	SEMA6D	cellular_component	plasma membrane
GO:0005886	80144	hsa-miR-1246	FRAS1	cellular_component	plasma membrane
GO:0005886	818	hsa-miR-1246	CAMK2G	cellular_component	plasma membrane
GO:0005886	83464	hsa-miR-1246	APH1B	cellular_component	plasma membrane
GO:0005886	83850	hsa-miR-1246	ESYT3	cellular_component	plasma membrane
GO:0005886	84168	hsa-miR-1246	ANTXR1	cellular_component	plasma membrane
GO:0005886	84466	hsa-miR-1246	MEGF10	cellular_component	plasma membrane
GO:0005886	8455	hsa-miR-1246	ATRN	cellular_component	plasma membrane
GO:0005886	857	hsa-miR-1246	CAV1	cellular_component	plasma membrane
GO:0005886	8653	hsa-miR-1246	DDX3Y	cellular_component	plasma membrane
GO:0005886	8655	hsa-miR-1246	DYNLL1	cellular_component	plasma membrane
GO:0005886	8671	hsa-miR-1246	SLC4A4	cellular_component	plasma membrane
GO:0005886	8795	hsa-miR-1246	TNFRSF10B	cellular_component	plasma membrane
GO:0005886	8828	hsa-miR-1246	NRP2	cellular_component	plasma membrane
GO:0005886	8842	hsa-miR-1246	PROM1	cellular_component	plasma membrane
GO:0005886	9194	hsa-miR-1246	SLC16A7	cellular_component	plasma membrane
GO:0005886	92	hsa-miR-1246	ACVR2A	cellular_component	plasma membrane
GO:0005886	9214	hsa-miR-1246	FAIM3	cellular_component	plasma membrane
GO:0005886	9229	hsa-miR-1246	DLGAP1	cellular_component	plasma membrane
GO:0005886	933	hsa-miR-1246	CD22	cellular_component	plasma membrane
GO:0005886	943	hsa-miR-1246	TNFRSF8	cellular_component	plasma membrane
GO:0005886	9444	hsa-miR-1246	QKI	cellular_component	plasma membrane
GO:0005886	948	hsa-miR-1246	CD36	cellular_component	plasma membrane
GO:0005886	9495	hsa-miR-1246	AKAP5	cellular_component	plasma membrane
GO:0005886	960	hsa-miR-1246	CD44	cellular_component	plasma membrane
GO:0005886	9752	hsa-miR-1246	PCDHA9	cellular_component	plasma membrane
GO:0005886	9863	hsa-miR-1246	MAGI2	cellular_component	plasma membrane
GO:0005886	10134	hsa-miR-4734	BCAP31	cellular_component	plasma membrane
GO:0005886	10154	hsa-miR-4734	PLXNC1	cellular_component	plasma membrane
GO:0005886	10268	hsa-miR-4734	RAMP3	cellular_component	plasma membrane
GO:0005886	10332	hsa-miR-4734	CLEC4M	cellular_component	plasma membrane
GO:0005886	10397	hsa-miR-4734	NDRG1	cellular_component	plasma membrane
GO:0005886	10718	hsa-miR-4734	NRG3	cellular_component	plasma membrane
GO:0005886	115	hsa-miR-4734	ADCY9	cellular_component	plasma membrane
GO:0005886	116535	hsa-miR-4734	MRGPRF	cellular_component	plasma membrane
GO:0005886	119	hsa-miR-4734	ADD2	cellular_component	plasma membrane
GO:0005886	126014	hsa-miR-4734	OSCAR	cellular_component	plasma membrane
GO:0005886	1435	hsa-miR-4734	CSF1	cellular_component	plasma membrane
GO:0005886	145270	hsa-miR-4734	PRIMA1	cellular_component	plasma membrane
GO:0005886	146760	hsa-miR-4734	RTN4RL1	cellular_component	plasma membrane
GO:0005886	153201	hsa-miR-4734	SLC36A2	cellular_component	plasma membrane
GO:0005886	1735	hsa-miR-4734	DIO3	cellular_component	plasma membrane
GO:0005886	1889	hsa-miR-4734	ECE1	cellular_component	plasma membrane
GO:0005886	1896	hsa-miR-4734	EDA	cellular_component	plasma membrane
GO:0005886	1909	hsa-miR-4734	EDNRA	cellular_component	plasma membrane
GO:0005886	2064	hsa-miR-4734	ERBB2	cellular_component	plasma membrane
GO:0005886	221188	hsa-miR-4734	GPR114	cellular_component	plasma membrane
GO:0005886	22941	hsa-miR-4734	SHANK2	cellular_component	plasma membrane
GO:0005886	23162	hsa-miR-4734	MAPK8IP3	cellular_component	plasma membrane
GO:0005886	25844	hsa-miR-4734	YIPF3	cellular_component	plasma membrane
GO:0005886	26051	hsa-miR-4734	PPP1R16B	cellular_component	plasma membrane
GO:0005886	2675	hsa-miR-4734	GFRA2	cellular_component	plasma membrane
GO:0005886	2765	hsa-miR-4734	GML	cellular_component	plasma membrane
GO:0005886	2774	hsa-miR-4734	GNAL	cellular_component	plasma membrane
GO:0005886	2778	hsa-miR-4734	GNAS	cellular_component	plasma membrane
GO:0005886	2779	hsa-miR-4734	GNAT1	cellular_component	plasma membrane
GO:0005886	283383	hsa-miR-4734	GPR133	cellular_component	plasma membrane
GO:0005886	2902	hsa-miR-4734	GRIN1	cellular_component	plasma membrane
GO:0005886	2916	hsa-miR-4734	GRM6	cellular_component	plasma membrane
GO:0005886	3069	hsa-miR-4734	HDLBP	cellular_component	plasma membrane
GO:0005886	30835	hsa-miR-4734	CD209	cellular_component	plasma membrane
GO:0005886	340273	hsa-miR-4734	ABCB5	cellular_component	plasma membrane
GO:0005886	359	hsa-miR-4734	AQP2	cellular_component	plasma membrane
GO:0005886	3741	hsa-miR-4734	KCNA5	cellular_component	plasma membrane
GO:0005886	3753	hsa-miR-4734	KCNE1	cellular_component	plasma membrane
GO:0005886	4627	hsa-miR-4734	MYH9	cellular_component	plasma membrane
GO:0005886	4987	hsa-miR-4734	OPRL1	cellular_component	plasma membrane
GO:0005886	50636	hsa-miR-4734	ANO7	cellular_component	plasma membrane
GO:0005886	51150	hsa-miR-4734	SDF4	cellular_component	plasma membrane
GO:0005886	5256	hsa-miR-4734	PHKA2	cellular_component	plasma membrane
GO:0005886	5348	hsa-miR-4734	FXYD1	cellular_component	plasma membrane
GO:0005886	53635	hsa-miR-4734	PTOV1	cellular_component	plasma membrane
GO:0005886	54796	hsa-miR-4734	BNC2	cellular_component	plasma membrane
GO:0005886	5578	hsa-miR-4734	PRKCA	cellular_component	plasma membrane
GO:0005886	55803	hsa-miR-4734	ADAP2	cellular_component	plasma membrane
GO:0005886	56963	hsa-miR-4734	RGMA	cellular_component	plasma membrane
GO:0005886	57105	hsa-miR-4734	CYSLTR2	cellular_component	plasma membrane
GO:0005886	58191	hsa-miR-4734	CXCL16	cellular_component	plasma membrane
GO:0005886	5829	hsa-miR-4734	PXN	cellular_component	plasma membrane
GO:0005886	5996	hsa-miR-4734	RGS1	cellular_component	plasma membrane
GO:0005886	64284	hsa-miR-4734	RAB17	cellular_component	plasma membrane
GO:0005886	64386	hsa-miR-4734	MMP25	cellular_component	plasma membrane
GO:0005886	66004	hsa-miR-4734	LYNX1	cellular_component	plasma membrane
GO:0005886	6752	hsa-miR-4734	SSTR2	cellular_component	plasma membrane
GO:0005886	7094	hsa-miR-4734	TLN1	cellular_component	plasma membrane
GO:0005886	7099	hsa-miR-4734	TLR4	cellular_component	plasma membrane
GO:0005886	729359	hsa-miR-4734	PLIN4	cellular_component	plasma membrane
GO:0005886	7430	hsa-miR-4734	EZR	cellular_component	plasma membrane
GO:0005886	753	hsa-miR-4734	C18orf1	cellular_component	plasma membrane
GO:0005886	773	hsa-miR-4734	CACNA1A	cellular_component	plasma membrane
GO:0005886	79850	hsa-miR-4734	FAM57A	cellular_component	plasma membrane
GO:0005886	83464	hsa-miR-4734	APH1B	cellular_component	plasma membrane
GO:0005886	83692	hsa-miR-4734	CD99L2	cellular_component	plasma membrane
GO:0005886	84552	hsa-miR-4734	PARD6G	cellular_component	plasma membrane
GO:0005886	84866	hsa-miR-4734	TMEM25	cellular_component	plasma membrane
GO:0005886	8527	hsa-miR-4734	DGKD	cellular_component	plasma membrane
GO:0005886	8742	hsa-miR-4734	TNFSF12	cellular_component	plasma membrane
GO:0005886	886	hsa-miR-4734	CCKAR	cellular_component	plasma membrane
GO:0005886	9223	hsa-miR-4734	MAGI1	cellular_component	plasma membrane
GO:0005886	925	hsa-miR-4734	CD8A	cellular_component	plasma membrane
GO:0005886	9368	hsa-miR-4734	SLC9A3R1	cellular_component	plasma membrane
GO:0005886	953	hsa-miR-4734	ENTPD1	cellular_component	plasma membrane
GO:0005886	9649	hsa-miR-4734	RALGPS1	cellular_component	plasma membrane
GO:0005886	9856	hsa-miR-4734	KIAA0319	cellular_component	plasma membrane
GO:0005886	1006	hsa-miR-663	CDH8	cellular_component	plasma membrane
GO:0005886	10232	hsa-miR-663	MSLN	cellular_component	plasma membrane
GO:0005886	10297	hsa-miR-663	APC2	cellular_component	plasma membrane
GO:0005886	10333	hsa-miR-663	TLR6	cellular_component	plasma membrane
GO:0005886	10369	hsa-miR-663	CACNG2	cellular_component	plasma membrane
GO:0005886	10458	hsa-miR-663	BAIAP2	cellular_component	plasma membrane
GO:0005886	11021	hsa-miR-663	RAB35	cellular_component	plasma membrane
GO:0005886	11135	hsa-miR-663	CDC42EP1	cellular_component	plasma membrane
GO:0005886	11255	hsa-miR-663	HRH3	cellular_component	plasma membrane
GO:0005886	1137	hsa-miR-663	CHRNA4	cellular_component	plasma membrane
GO:0005886	1141	hsa-miR-663	CHRNB2	cellular_component	plasma membrane
GO:0005886	114784	hsa-miR-663	CSMD2	cellular_component	plasma membrane
GO:0005886	115362	hsa-miR-663	GBP5	cellular_component	plasma membrane
GO:0005886	117	hsa-miR-663	ADCYAP1R1	cellular_component	plasma membrane
GO:0005886	1230	hsa-miR-663	CCR1	cellular_component	plasma membrane
GO:0005886	1236	hsa-miR-663	CCR7	cellular_component	plasma membrane
GO:0005886	1238	hsa-miR-663	CCBP2	cellular_component	plasma membrane
GO:0005886	124925	hsa-miR-663	SEZ6	cellular_component	plasma membrane
GO:0005886	125111	hsa-miR-663	GJD3	cellular_component	plasma membrane
GO:0005886	129880	hsa-miR-663	BBS5	cellular_component	plasma membrane
GO:0005886	1435	hsa-miR-663	CSF1	cellular_component	plasma membrane
GO:0005886	1457	hsa-miR-663	CSNK2A1	cellular_component	plasma membrane
GO:0005886	1534	hsa-miR-663	CYB561	cellular_component	plasma membrane
GO:0005886	156	hsa-miR-663	ADRBK1	cellular_component	plasma membrane
GO:0005886	160622	hsa-miR-663	GRASP	cellular_component	plasma membrane
GO:0005886	1609	hsa-miR-663	DGKQ	cellular_component	plasma membrane
GO:0005886	161	hsa-miR-663	AP2A2	cellular_component	plasma membrane
GO:0005886	1742	hsa-miR-663	DLG4	cellular_component	plasma membrane
GO:0005886	187	hsa-miR-663	APLNR	cellular_component	plasma membrane
GO:0005886	1943	hsa-miR-663	EFNA2	cellular_component	plasma membrane
GO:0005886	1946	hsa-miR-663	EFNA5	cellular_component	plasma membrane
GO:0005886	1969	hsa-miR-663	EPHA2	cellular_component	plasma membrane
GO:0005886	2036	hsa-miR-663	EPB41L1	cellular_component	plasma membrane
GO:0005886	2272	hsa-miR-663	FHIT	cellular_component	plasma membrane
GO:0005886	22883	hsa-miR-663	CLSTN1	cellular_component	plasma membrane
GO:0005886	23025	hsa-miR-663	UNC13A	cellular_component	plasma membrane
GO:0005886	23048	hsa-miR-663	FNBP1	cellular_component	plasma membrane
GO:0005886	23109	hsa-miR-663	DDN	cellular_component	plasma membrane
GO:0005886	23129	hsa-miR-663	PLXND1	cellular_component	plasma membrane
GO:0005886	2316	hsa-miR-663	FLNA	cellular_component	plasma membrane
GO:0005886	2321	hsa-miR-663	FLT1	cellular_component	plasma membrane
GO:0005886	23237	hsa-miR-663	ARC	cellular_component	plasma membrane
GO:0005886	23371	hsa-miR-663	TENC1	cellular_component	plasma membrane
GO:0005886	23396	hsa-miR-663	PIP5K1C	cellular_component	plasma membrane
GO:0005886	23413	hsa-miR-663	FREQ	cellular_component	plasma membrane
GO:0005886	23428	hsa-miR-663	SLC7A8	cellular_component	plasma membrane
GO:0005886	23551	hsa-miR-663	RASD2	cellular_component	plasma membrane
GO:0005886	24146	hsa-miR-663	CLDN15	cellular_component	plasma membrane
GO:0005886	251	hsa-miR-663	ALPPL2	cellular_component	plasma membrane
GO:0005886	257629	hsa-miR-663	ANKS4B	cellular_component	plasma membrane
GO:0005886	25960	hsa-miR-663	GPR124	cellular_component	plasma membrane
GO:0005886	2619	hsa-miR-663	GAS1	cellular_component	plasma membrane
GO:0005886	266727	hsa-miR-663	MDGA1	cellular_component	plasma membrane
GO:0005886	2771	hsa-miR-663	GNAI2	cellular_component	plasma membrane
GO:0005886	2788	hsa-miR-663	GNG7	cellular_component	plasma membrane
GO:0005886	2812	hsa-miR-663	GP1BB	cellular_component	plasma membrane
GO:0005886	2814	hsa-miR-663	GP5	cellular_component	plasma membrane
GO:0005886	2817	hsa-miR-663	GPC1	cellular_component	plasma membrane
GO:0005886	2852	hsa-miR-663	GPER	cellular_component	plasma membrane
GO:0005886	285489	hsa-miR-663	DOK7	cellular_component	plasma membrane
GO:0005886	285613	hsa-miR-663	RELL2	cellular_component	plasma membrane
GO:0005886	286204	hsa-miR-663	CRB2	cellular_component	plasma membrane
GO:0005886	290	hsa-miR-663	ANPEP	cellular_component	plasma membrane
GO:0005886	2906	hsa-miR-663	GRIN2D	cellular_component	plasma membrane
GO:0005886	2911	hsa-miR-663	GRM1	cellular_component	plasma membrane
GO:0005886	2914	hsa-miR-663	GRM4	cellular_component	plasma membrane
GO:0005886	30835	hsa-miR-663	CD209	cellular_component	plasma membrane
GO:0005886	3265	hsa-miR-663	HRAS	cellular_component	plasma membrane
GO:0005886	3315	hsa-miR-663	HSPB1	cellular_component	plasma membrane
GO:0005886	348	hsa-miR-663	APOE	cellular_component	plasma membrane
GO:0005886	3566	hsa-miR-663	IL4R	cellular_component	plasma membrane
GO:0005886	3611	hsa-miR-663	ILK	cellular_component	plasma membrane
GO:0005886	3691	hsa-miR-663	ITGB4	cellular_component	plasma membrane
GO:0005886	3728	hsa-miR-663	JUP	cellular_component	plasma membrane
GO:0005886	375	hsa-miR-663	ARF1	cellular_component	plasma membrane
GO:0005886	3767	hsa-miR-663	KCNJ11	cellular_component	plasma membrane
GO:0005886	388	hsa-miR-663	RHOB	cellular_component	plasma membrane
GO:0005886	394263	hsa-miR-663	MUC21	cellular_component	plasma membrane
GO:0005886	4035	hsa-miR-663	LRP1	cellular_component	plasma membrane
GO:0005886	4046	hsa-miR-663	LSP1	cellular_component	plasma membrane
GO:0005886	4059	hsa-miR-663	BCAM	cellular_component	plasma membrane
GO:0005886	4064	hsa-miR-663	CD180	cellular_component	plasma membrane
GO:0005886	4088	hsa-miR-663	SMAD3	cellular_component	plasma membrane
GO:0005886	409	hsa-miR-663	ARRB2	cellular_component	plasma membrane
GO:0005886	4137	hsa-miR-663	MAPT	cellular_component	plasma membrane
GO:0005886	4185	hsa-miR-663	ADAM11	cellular_component	plasma membrane
GO:0005886	4359	hsa-miR-663	MPZ	cellular_component	plasma membrane
GO:0005886	4684	hsa-miR-663	NCAM1	cellular_component	plasma membrane
GO:0005886	4771	hsa-miR-663	NF2	cellular_component	plasma membrane
GO:0005886	4774	hsa-miR-663	NFIA	cellular_component	plasma membrane
GO:0005886	4804	hsa-miR-663	NGFR	cellular_component	plasma membrane
GO:0005886	482	hsa-miR-663	ATP1B2	cellular_component	plasma membrane
GO:0005886	492	hsa-miR-663	ATP2B3	cellular_component	plasma membrane
GO:0005886	5032	hsa-miR-663	P2RY11	cellular_component	plasma membrane
GO:0005886	50632	hsa-miR-663	CALY	cellular_component	plasma membrane
GO:0005886	5064	hsa-miR-663	PALM	cellular_component	plasma membrane
GO:0005886	5133	hsa-miR-663	PDCD1	cellular_component	plasma membrane
GO:0005886	5156	hsa-miR-663	PDGFRA	cellular_component	plasma membrane
GO:0005886	5287	hsa-miR-663	PIK3C2B	cellular_component	plasma membrane
GO:0005886	535	hsa-miR-663	ATP6V0A1	cellular_component	plasma membrane
GO:0005886	53826	hsa-miR-663	FXYD6	cellular_component	plasma membrane
GO:0005886	53834	hsa-miR-663	FGFRL1	cellular_component	plasma membrane
GO:0005886	5413	hsa-miR-663	2013-09-05	cellular_component	plasma membrane
GO:0005886	54328	hsa-miR-663	GPR173	cellular_component	plasma membrane
GO:0005886	54756	hsa-miR-663	IL17RD	cellular_component	plasma membrane
GO:0005886	54923	hsa-miR-663	LIME1	cellular_component	plasma membrane
GO:0005886	55361	hsa-miR-663	PI4K2A	cellular_component	plasma membrane
GO:0005886	55679	hsa-miR-663	LIMS2	cellular_component	plasma membrane
GO:0005886	56134	hsa-miR-663	PCDHAC2	cellular_component	plasma membrane
GO:0005886	56135	hsa-miR-663	PCDHAC1	cellular_component	plasma membrane
GO:0005886	56136	hsa-miR-663	PCDHA13	cellular_component	plasma membrane
GO:0005886	56137	hsa-miR-663	PCDHA12	cellular_component	plasma membrane
GO:0005886	56138	hsa-miR-663	PCDHA11	cellular_component	plasma membrane
GO:0005886	56139	hsa-miR-663	PCDHA10	cellular_component	plasma membrane
GO:0005886	56140	hsa-miR-663	PCDHA8	cellular_component	plasma membrane
GO:0005886	56141	hsa-miR-663	PCDHA7	cellular_component	plasma membrane
GO:0005886	56142	hsa-miR-663	PCDHA6	cellular_component	plasma membrane
GO:0005886	56143	hsa-miR-663	PCDHA5	cellular_component	plasma membrane
GO:0005886	56144	hsa-miR-663	PCDHA4	cellular_component	plasma membrane
GO:0005886	56145	hsa-miR-663	PCDHA3	cellular_component	plasma membrane
GO:0005886	56146	hsa-miR-663	PCDHA2	cellular_component	plasma membrane
GO:0005886	56147	hsa-miR-663	PCDHA1	cellular_component	plasma membrane
GO:0005886	56963	hsa-miR-663	RGMA	cellular_component	plasma membrane
GO:0005886	57048	hsa-miR-663	PLSCR3	cellular_component	plasma membrane
GO:0005886	57104	hsa-miR-663	PNPLA2	cellular_component	plasma membrane
GO:0005886	57192	hsa-miR-663	MCOLN1	cellular_component	plasma membrane
GO:0005886	5733	hsa-miR-663	PTGER3	cellular_component	plasma membrane
GO:0005886	57468	hsa-miR-663	SLC12A5	cellular_component	plasma membrane
GO:0005886	57706	hsa-miR-663	DENND1A	cellular_component	plasma membrane
GO:0005886	57716	hsa-miR-663	PRX	cellular_component	plasma membrane
GO:0005886	5792	hsa-miR-663	PTPRF	cellular_component	plasma membrane
GO:0005886	5819	hsa-miR-663	PVRL2	cellular_component	plasma membrane
GO:0005886	5864	hsa-miR-663	RAB3A	cellular_component	plasma membrane
GO:0005886	5871	hsa-miR-663	MAP4K2	cellular_component	plasma membrane
GO:0005886	5878	hsa-miR-663	RAB5C	cellular_component	plasma membrane
GO:0005886	59339	hsa-miR-663	PLEKHA2	cellular_component	plasma membrane
GO:0005886	64072	hsa-miR-663	CDH23	cellular_component	plasma membrane
GO:0005886	64386	hsa-miR-663	MMP25	cellular_component	plasma membrane
GO:0005886	6529	hsa-miR-663	SLC6A1	cellular_component	plasma membrane
GO:0005886	6556	hsa-miR-663	SLC11A1	cellular_component	plasma membrane
GO:0005886	66008	hsa-miR-663	TRAK2	cellular_component	plasma membrane
GO:0005886	6624	hsa-miR-663	FSCN1	cellular_component	plasma membrane
GO:0005886	6751	hsa-miR-663	SSTR1	cellular_component	plasma membrane
[truncated: 25,853 more rows]
